# Supplementary material
Source: PubMed Central journal article supplement (PMC3116711)
Supplement: NIHMS298691-supplement-1_si_001.pdf [file NIHMS298691-supplement-1_si_001.pdf]

## A Convergent and Stereodivergent Synthesis of Complex 1-Aza-7-Oxabicyclo[2.2.1]heptanes

Dexi Yang and Glenn C. Micalizio\*

Department of Chemistry, The Scripps Research Institute, Scripps Florida, Jupiter,  
Florida 33458

### Supporting Information

**General Information:** All reactions were carried out in flame-dried flasks under an atmosphere of dry argon unless otherwise specified. Toluene and dichloromethane were dried over activated alumina columns and sparged with argon prior to use. Diethyl ether and tetrahydrofuran were dried and distilled from sodium-benzophenone. Ti(O*i*-Pr)<sub>4</sub> (Aldrich, 97%) was distilled prior to use (69-70 °C, < 1 Torr). Butyllithium and *c*-C<sub>5</sub>H<sub>9</sub>MgCl (Aldrich) were titrated by the method of Love *et al.*<sup>1</sup> Chiral allylic alcohols (–)-**9** and (+)-**11** were prepared according to the literature procedures for similar compounds.<sup>2,3</sup> Enantiomeric excess of chiral alcohols (–)-**9** and (+)-**11** was determined by using Mosher's ester analysis.<sup>4</sup> Enantiomeric excess of homoallylic amines **52** and **56** was determined by using Mosher's amide analysis.<sup>5</sup> All other solvents and reagents were used as received from commercial suppliers. Thin-layer chromatography was performed on 250 μm E. Merck silica gel plates (60F-254). Flash column chromatography was performed using Silicycle SiliaFlash P60 silica gel, 40-63 μm particle size. <sup>1</sup>H NMR data were recorded at 400 MHz on a Bruker AM-400 in CD<sub>3</sub>Cl or CD<sub>2</sub>Cl<sub>2</sub>. <sup>13</sup>C NMR data were recorded at 100 MHz on a Bruker AM-400. <sup>13</sup>C NMR data are reported by listing the chemical shift along with a parenthetical description of the substitution (q = three attached protons, t = two attached protons, d = one attached proton, s = no attached proton). Infrared spectra were recorded on a PerkinElmer SpectrumOne FT-IR instrument. LRMS spectra were acquired on a Varian 500-MS mass spectrometer under soft ionization mode. HRMS (ESI-TOF-MS) was performed on Thermo LTQ Orbitrap Mass Spectrometry at Scripps Florida. Optical rotations were measured using a quartz cell with a 0.5 mL capacity and a 10 cm path length.

**Procedure for the preparation of primary amines listed in Table 1:**

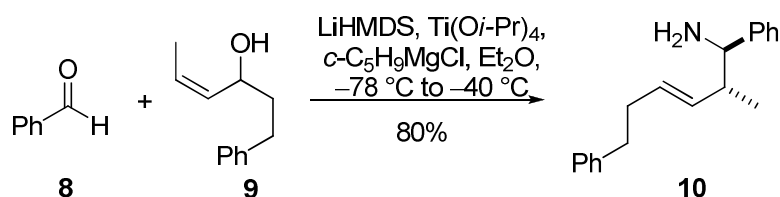

**Preparation of (±)-(1*S*,2*S*,*E*)-2-methyl-1,6-diphenylhex-3-en-1-amine (10):** To a solution of 530 mg (5.0 mmol) of benzaldehyde in 10 mL of anhydrous ether was added 5.0 mL (5.0 mmol) of 1.0 M LiHMDS in THF at -10 °C under argon. The reaction mixture initially appeared milky, then quickly became a clear pale yellow solution. After 20 min, a solution of 1.56 mL (1.42 g, 5.0 mmol) of Ti(O*i*-Pr)<sub>4</sub> in 10 mL of anhydrous ether was added via a syringe. After stirring for 5 min, the solution was cooled to -78 °C, and 5.0 mL (10.0 mmol) of 2.0 M *c*-C<sub>5</sub>H<sub>9</sub>MgCl in diethyl ether was added via a syringe over 2 min. The temperature of the solution was raised to -40 °C over 30 min, then the mixture was stirred at -40 °C for an additional 1.5 h, resulting in a dark brown suspension. Next, a solution of lithium alkoxide of alcohol **9** in 4 mL of THF, prepared by deprotonation of 440 mg (2.5 mmol) of alcohol **9** at -78 °C with 1.1 mL (2.75 mmol) of 2.5 M *n*-BuLi in hexanes followed by 10 min stirring, was added to the brown solution via cannula.<sup>6</sup> The mixture was warmed to room temperature over 2 h, then stirred for 12 h. Finally, sequential addition of 10 mL of diethyl ether and 5 mL of sat. aq. NaHCO<sub>3</sub> was followed by vigorous stirring for 1 h. The aqueous phase was separated and extracted with 10 mL of diethyl ether (2×). The organic extracts were combined, dried (MgSO<sub>4</sub>), and concentrated *in vacuo* to afford a pale yellow oil. The residue was purified by chromatography over 50 g of silica gel (CH<sub>2</sub>Cl<sub>2</sub>:MeOH:NH<sub>4</sub>OH = 400:10:1) to give 534 mg (80%, d.r. ≥ 20:1, *E*:*Z* ≥ 20:1) of homoallylic amine **10** as a colorless oil.

Data for amine **10**: IR (neat) 3584, 3366, 2958, 1603, 1495, 1454 cm<sup>-1</sup>; <sup>1</sup>H NMR (CDCl<sub>3</sub>, 400 MHz) δ 0.79 (d, *J* = 6.8 Hz, 3H, CH<sub>3</sub>), 1.70 (br, 2H, NH<sub>2</sub>), 2.31 (qd, *J* = 8.0, 6.8 Hz, 1H, CHCH<sub>3</sub>), 2.42 (m, 2H, PhCH<sub>2</sub>CH<sub>2</sub>-), 2.75 (m, 2H, PhCH<sub>2</sub>), 3.53 (d, *J* = 8.8 Hz, 1H, CHNH), 5.32 (m, 1H, -CH<sub>2</sub>CH=CH-), 5.53 (td, *J* = 13.6, 6.4 Hz, 1H, CH<sub>2</sub>CH=CH), 7.21-

7.29 (m, 10H, Ph-);  $^{13}\text{C}$  NMR ( $\text{CDCl}_3$ , 100 MHz)  $\delta$  18.13 (q), 34.44 (t), 35.87 (t), 45.24 (d), 60.96 (d), 125.83 (d), 126.99 (d), 127.37 (d), 128.27 (d), 128.32 (d), 128.58 (d), 131.00 (d), 134.13 (d), 141.87 (s), 144.67 (s); LRMS  $\text{C}_{19}\text{H}_{23}\text{N} + \text{H}^+$  calcd  $m/z$  266.2, found  $m/z$  266.5.

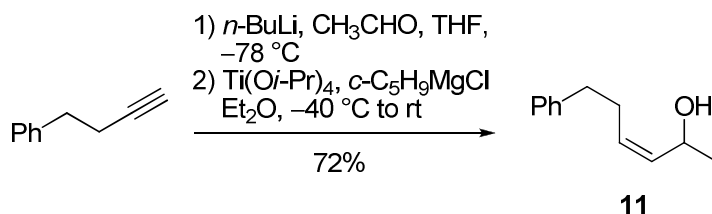

**Preparation of (Z)-6-phenylhex-3-en-2-ol (11):** To a solution of 5.0 g (38.5 mmol) of 4-phenyl-1-butyne in 40 mL of anhydrous THF at  $-78\text{ }^\circ\text{C}$  was added 16.9 mL of  $n\text{-BuLi}$  (2.5 M in hexanes) dropwise via a syringe under argon. The mixture was stirred for 30 min before introduction of a cold ( $-78\text{ }^\circ\text{C}$ ) solution of acetaldehyde in 20 mL of THF via cannula. After stirring for 30 min, 25 mL of sat. aq.  $\text{NH}_4\text{Cl}$  was added. The aqueous phase was extracted with 50 mL of diethyl ether (2 $\times$ ). The combined organic extract was washed with 50 mL of brine, dried ( $\text{MgSO}_4$ ), and concentrated *in vacuo*. The crude product was purified by flash chromatography over 100 g of silica gel (10% ethyl acetate in hexanes) to afford 7.0 g (>99%) of 6-phenylhex-3-yn-2-ol as a colorless oil. 3.1 g (17.8 mmol) of 6-phenylhex-3-yn-2-ol was immediately added to a solution of 10.1 g (35.8 mmol) of  $\text{Ti}(\text{O}i\text{-Pr})_4$  in 60 mL of anhydrous ether under argon at  $-78\text{ }^\circ\text{C}$ , followed by dropwise addition of 44.5 mL (89.0 mmol) of  $c\text{-C}_5\text{H}_9\text{MgCl}$  (2.0 M in  $\text{Et}_2\text{O}$ ) over 20 min under argon. The mixture was stirred at  $-40\text{ }^\circ\text{C}$  for 2 h, then was slowly raised to  $0\text{ }^\circ\text{C}$  over 1 h before adding 30 mL of sat. aq.  $\text{NaHCO}_3$ . The resulting slurry was stirred rapidly for overnight and resulted in a biphasic mixture. The aqueous layer was extracted with 50 mL of diethyl ether (2 $\times$ ). The combined organic extract was dried ( $\text{MgSO}_4$ ) and concentrated *in vacuo*. The residue was purified by chromatography over 50 g of silica gel (10% ethyl acetate in hexanes) to give 2.26 g (72%, d.r.  $\geq 20:1$ ,  $Z:E \geq 20:1$ ) of alcohol **11** as a water white oil.

Data for alcohol **11**: IR (neat) 3368, 2968, 1709, 1603, 1496, 1368, 1257, 1058  $\text{cm}^{-1}$ ;  $^1\text{H}$  NMR ( $\text{CDCl}_3$ , 400 MHz)  $\delta$  1.12 (d,  $J = 6.4$  Hz, 3H,  $\text{CH}_3$ ), 1.59 (br, 1H, OH), 2.47 (m, 2H,  $\text{CH}_2$ ), 2.71 (m, 2H,  $\text{CH}_2$ ), 4.46 (qd,  $J = 8.0, 6.4$  Hz, 1H,  $\text{CHOH}$ ), 5.46 (m, 2H,  $-\text{CH}=\text{CH}-$ ), 7.19-7.33 (m, 5H, Ph-);  $^{13}\text{C}$  NMR ( $\text{CDCl}_3$ , 100 MHz)  $\delta$  23.09 (q), 29.54 (t), 35.71 (t), 63.61 (d), 126.07 (d), 128.34 (d), 128.68 (d), 129.70 (d), 134.71 (d), 141.54 (s); LRMS  $\text{C}_{12}\text{H}_{16}\text{O} + \text{Na}^+$  calcd  $m/z$  199.1, found  $m/z$  199.3.

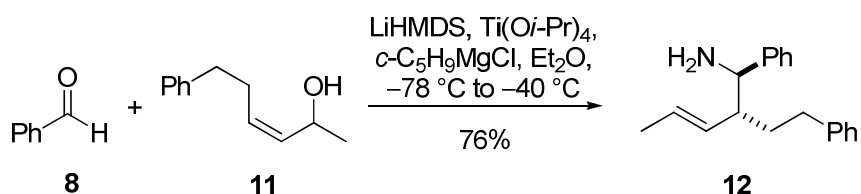

**Preparation of ( $\pm$ )-(1*R*,2*R*,*E*)-2-phenethyl-1-phenylpent-3-en-1-amine (**12**):** To a solution of 424 mg (4.0 mmol) of benzaldehyde in 10 mL of anhydrous ether was added 4.0 mL (4.0 mmol) of 1.0 M LiHMDS in THF at  $-10\text{ }^\circ\text{C}$  under argon. The reaction mixture initially appeared milky, then quickly became a clear pale yellow solution. After 20 min, a solution of 1.83 mL (1.70 g, 6.0 mmol) of  $\text{Ti}(\text{O}i\text{-Pr})_4$  in 10 mL of anhydrous ether was added via a syringe. After stirring for 5 min, the solution was cooled to  $-78\text{ }^\circ\text{C}$ , and 6.0 mL (12.0 mmol) of 2.0 M  $c\text{-C}_5\text{H}_9\text{MgCl}$  in diethyl ether was added via a syringe over 2 min. The temperature of the solution was raised to  $-40\text{ }^\circ\text{C}$  over 30 min, then the mixture was stirred at  $-40\text{ }^\circ\text{C}$  for an additional 1.5 h, resulting in a dark brown suspension. Next, a solution of lithium alkoxide of alcohol **11** in 4 mL of THF, prepared by deprotonation of 352 mg (2.0 mmol) of alcohol **11** at  $-78\text{ }^\circ\text{C}$  with 0.88 mL (2.2 mmol) of 2.5 M  $n\text{-BuLi}$  in hexanes followed by 10 min stirring, was added to the brown solution via cannula. The mixture was warmed to room temperature over 2 h, then was stirred for 12 h. Finally, sequential addition of 10 mL of diethyl ether and 5 mL of saturated aqueous  $\text{NaHCO}_3$  was followed by vigorous stirring for 1 h. The aqueous phase was separated and extracted with 10 mL of diethyl ether (2 $\times$ ). The organic extracts were combined, dried ( $\text{MgSO}_4$ ), and concentrated *in vacuo* to afford a pale yellow oil. The residue was purified by chromatography over 50 g of silica gel ( $\text{CH}_2\text{Cl}_2:\text{MeOH}:\text{NH}_4\text{OH} =$

400:10:1) to give 404 mg (76%, d.r.  $\geq$  20:1, *E:Z*  $\geq$  20:1) of homoallylic amine **12** as a colorless oil.

Data for amine **12**: IR (neat) 3584, 3233, 2918, 1584, 1495  $\text{cm}^{-1}$ ;  $^1\text{H}$  NMR ( $\text{CDCl}_3$ , 400 MHz)  $\delta$  1.30 and 1.38 (m, 2H,  $\text{PhCH}_2\text{CH}_2^-$ ), 1.50 (br, 2H,  $\text{NH}_2$ ), 1.69 (dd,  $J = 6.4, 1.6$  Hz, 3H,  $\text{CH}_3$ ), 2.08 (tdd,  $J = 8.8, 8.8, 3.6$  Hz, 1H,  $\text{CHCH}_2$ ), 2.25 and 2.54 (m, 2H,  $\text{PhCH}_2$ ), 3.57 (d,  $J = 8.8$  Hz, 1H,  $\text{CHNH}$ ), 5.20 (m, 1H,  $\text{CH}_3\text{CH}=\text{CH}^-$ ), 5.53 (qd,  $J = 12.4, 6.4$  Hz, 1H,  $\text{CH}_3\text{CH}=\text{CH}$ ), 7.10-7.23 (m, 10H, Ph-);  $^{13}\text{C}$  NMR ( $\text{CDCl}_3$ , 100 MHz)  $\delta$  18.16 (q), 33.18 (t), 35.53 (t), 50.79 (d), 59.88 (d), 125.53 (d), 127.05 (d), 127.48 (d), 128.15 (d), 128.28 (d), 128.38 (d), 128.97 (d), 132.57 (d), 142.45 (s), 144.71 (s); LRMS  $\text{C}_{19}\text{H}_{23}\text{N} + \text{H}^+$  calcd  $m/z$  266.2, found  $m/z$  266.4.

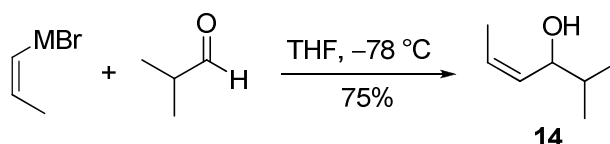

**Preparation of (Z)-2-methylhex-4-en-3-ol (**14**):** To a flame-dried 50 mL 3-neck round bottom flask was charged 600 mg (25.0 mmol) of magnesium turnings and 2 mg of iodine under argon. After introduction of 10 mL of anhydrous THF, the mixture was refluxed at 60 °C until it changed from brown to water white. A solution of 0.62 g (5.0 mmol) of (Z)-1-bromopropene in 20 mL of anhydrous THF was added via a syringe at a rate to maintain reflux. After stirring for an additional 2 h at 60 °C, the Grignard solution prepared was cooled to rt, and then was cannulated into a solution of 288 mg (4.0 mmol) of isobutyraldehyde in 10 mL of anhydrous THF at -78 °C under argon. After stirring for 2 h, 10 mL of sat. aq.  $\text{NH}_4\text{Cl}$  was added. The aqueous phase was extracted with 20 mL of diethyl ether (2 $\times$ ). The organic extracts were combined, dried ( $\text{MgSO}_4$ ), and concentrated *in vacuo* to afford a pale yellow oil. The residue was purified by chromatography over 50 g of silica gel (10% ethyl acetate in hexanes) to give 342 mg (75%, d.r.  $\geq$  20:1, *Z:E*  $\geq$  20:1) of alcohol **14** as a water white oil.

Data for alcohol **14**: IR (neat) 3367, 2958, 2874, 1659, 1469, 1381, 1006  $\text{cm}^{-1}$ ;  $^1\text{H}$  NMR ( $\text{CDCl}_3$ , 400 MHz)  $\delta$  0.80 (d,  $J = 6.8$  Hz, 3H,  $\text{CH}_3$ ), 0.89 (d,  $J = 6.8$  Hz, 3H,  $\text{CH}_3$ ), 1.46 (br, 1H, OH), 1.61 (dd,  $J = 7.2, 2.0$  Hz, 3H,  $\text{CH}_3$ ), 4.10 (m, 1H,  $\text{CH}_2\text{OH}$ ), 5.36 (m, 1H,  $\text{CH}=\text{CHCH}_3$ ), 5.76 (qd,  $J = 12.8, 6.8$  Hz, 1H,  $\text{CH}=\text{CHCH}_3$ );  $^{13}\text{C}$  NMR ( $\text{CDCl}_3$ , 100 MHz)  $\delta$  13.42 (q), 17.91 (q), 18.20 (q), 34.21 (d), 72.25 (d), 126.96 (d), 131.79 (d); LRMS  $\text{C}_7\text{H}_{14}\text{O} + \text{Na}^+$  calcd  $m/z$  137.1, found  $m/z$  137.3.

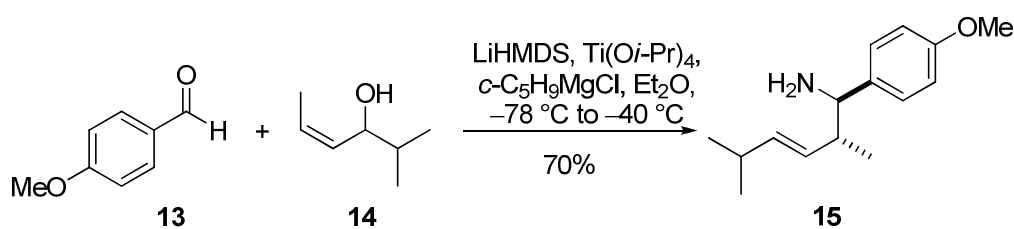

### Preparation of $(\pm)\text{-}(1R,2R,E)\text{-1-(4-methoxyphenyl)-2,5-dimethylhex-3-en-1-amine}$ (**15**):

To a stirred solution of 544 mg (4.0 mmol) of 4-methoxybenzaldehyde in 10 mL of anhydrous ether was added 4.0 mL (4.0 mmol) of 1.0 M LiHMDS in THF at  $-10\text{ }^\circ\text{C}$  under argon. The reaction mixture initially appeared milky, then quickly became a clear pale yellow solution. After 20 min, a solution of 1.83 mL (1.70 g, 6.0 mmol) of  $\text{Ti}(\text{O}i\text{-Pr})_4$  in 10 mL of anhydrous ether was added via a syringe. After stirring for 5 min, the solution was cooled to  $-78\text{ }^\circ\text{C}$ , and 6.0 mL (12.0 mmol) of 2.0 M  $c\text{-C}_5\text{H}_9\text{MgCl}$  in diethyl ether was added via a syringe over 2 min. The temperature of the solution was raised to  $-40\text{ }^\circ\text{C}$  over 30 min, then the mixture was stirred at  $-40\text{ }^\circ\text{C}$  for an additional 1.5 h, resulting in a dark brown suspension. Next, a solution of lithium alkoxide of alcohol **14** in 4 mL of THF, prepared by deprotonation of 228 mg (2.0 mmol) of alcohol **14** at  $-78\text{ }^\circ\text{C}$  with 0.88 mL (2.2 mmol) of 2.5 M  $n\text{-BuLi}$  in hexanes followed by 10 min stirring, was added to the brown solution via cannula. The mixture was warmed to room temperature over 2 h, then stirred for 16 h. Finally, sequential addition of 10 mL of diethyl ether and 10 mL of sat. aq.  $\text{NaHCO}_3$  was followed by vigorous stirring for 1 h. The aqueous phase was separated and extracted with 30 mL of diethyl ether (2 $\times$ ). The organic extracts were combined, dried ( $\text{MgSO}_4$ ), and concentrated *in vacuo* to afford a pale yellow oil. The residue was purified by chromatography over 50 g of silica gel ( $\text{CH}_2\text{Cl}_2\text{:MeOH:NH}_4\text{OH} =$

400:10:1) to give 326 mg (70%, d.r.  $\geq$  20:1, *E:Z*  $\geq$  20:1) of homoallylic amine **15** as a colorless oil.

Data for amine **15**: IR (neat) 3246, 2958, 2869, 1611, 1585, 1512, 1463  $\text{cm}^{-1}$ ;  $^1\text{H}$  NMR ( $\text{CDCl}_3$ , 400 MHz)  $\delta$  0.58 (d,  $J = 6.8$  Hz, 3H,  $\text{CH}_3$ ), 0.81 (d,  $J = 3.2$  Hz, 3H,  $\text{CH}(\text{CH}_3)_2$ ), 0.83 (d,  $J = 3.2$  Hz, 3H,  $\text{CH}(\text{CH}_3)_2$ ), 1.41 (br, 2H,  $\text{NH}_2$ ), 2.06 (qd,  $J = 8.0, 7.2$  Hz, 1H,  $\text{CHCH}_3$ ), 2.12 (m, 1H,  $\text{CH}(\text{CH}_3)_2$ ), 3.36 (d,  $J = 8.8$  Hz, 1H,  $\text{CHNH}$ ), 3.63 (s, 3H, OMe), 5.07 (dd,  $J = 15.6, 8.8$  Hz, 1H,  $\text{CH}=\text{CHCHCH}_3$ ), 5.39 (dd,  $J = 15.6, 6.8$  Hz, 1H, *i*-Pr $\text{CH}=\text{CH}$ ), 6.68 (dd,  $J = 6.4, 2.0$  Hz, 2H, Ph-), 7.07 (d,  $J = 8.8$  Hz, 2H, Ph-);  $^{13}\text{C}$  NMR ( $\text{CDCl}_3$ , 100 MHz)  $\delta$  18.23 (q), 22.69 (q), 22.73 (q), 31.14 (d), 45.36 (d), 55.25 (q), 60.42 (d), 113.56 (d), 128.36 (d), 130.18 (d), 136.89 (s), 139.38 (d), 158.59 (s); LRMS ( $\text{C}_{17}\text{H}_{23}\text{NO} + \text{H}^+ - \text{NH}_3$ ) calcd  $m/z$  217.2, found  $m/z$  217.4.

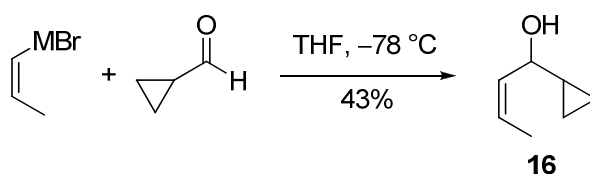

**Preparation of (Z)-1-cyclopropylbut-2-en-1-ol (**16**):** To a flame-dried 50 ml 3-neck round bottom flask was charged 0.72 g (30.0 mmol) of magnesium turnings and 2 mg of iodine under argon. After introduction of 10 mL of anhydrous THF, the mixture was refluxed at  $60\text{ }^\circ\text{C}$  until it changed from brown to water white. A solution of 1.68 g (12.0 mmol) of (Z)-1-bromopropene in 20 mL of anhydrous THF was added via a syringe at a rate to maintain reflux. After stirring for an additional 2 h at  $60\text{ }^\circ\text{C}$ , the Grignard solution prepared was cooled to rt, and was cannulated into a solution of 0.7 g (10.0 mmol) of cyclopropanecarbaldehyde in 10 mL of anhydrous THF at  $-78\text{ }^\circ\text{C}$  under argon. After stirring for 2 h, 10 mL of sat. aq.  $\text{NH}_4\text{Cl}$  was added. The aqueous phase was extracted with 20 mL of diethyl ether (2 $\times$ ). The organic extracts were combined, dried ( $\text{MgSO}_4$ ), and concentrated *in vacuo* to afford a pale yellow oil. The residue was purified by chromatography over 50 g of silica gel (20% ethyl acetate in hexanes) to give 480 mg (43%, d.r.  $\geq$  20:1, *Z:E*  $\geq$  20:1) of alcohol **16** as a water white oil.

Data for alcohol **16**: IR (neat) 3367, 3081, 3011, 2919, 1660, 1431, 1021  $\text{cm}^{-1}$ ;  $^1\text{H}$  NMR ( $\text{CDCl}_3$ , 400 MHz)  $\delta$  0.25 and 0.32 (m, 2H,  $\text{CH}(\text{CH}_2)_2$ ), 0.47 and 0.52 (m, 2H,  $\text{CH}(\text{CH}_2)_2$ ), 1.03 (m, 1H,  $\text{CH}(\text{CH}_2)_2$ ), 1.66 (dd,  $J = 6.8, 1.6$  Hz, 3H,  $\text{CH}_3$ ), 1.73 (br, 1H, OH), 3.95 (t,  $J = 8.0$  Hz, 1H,  $\text{CHOH}$ ), 5.51 (m, 1H,  $\text{CH}=\text{CHCH}_3$ ), 5.61 (qd,  $J = 12.8, 6.8$  Hz, 1H,  $\text{CH}=\text{CHCH}_3$ );  $^{13}\text{C}$  NMR ( $\text{CDCl}_3$ , 100 MHz)  $\delta$  0.00 (t), 1.15 (t), 11.73 (d), 16.05 (q), 69.53 (d), 124.64 (d), 130.23 (d); LRMS  $\text{C}_7\text{H}_{12}\text{O} + \text{Na}^+$  calcd  $m/z$  135.1, found  $m/z$  135.2.

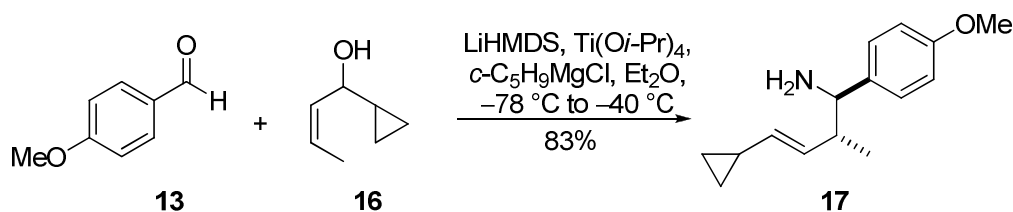

**Preparation of ( $\pm$ )-(1*R*,2*R*,*E*)-4-cyclopropyl-1-(4-methoxyphenyl)-2-methylbut-3-en-1-amine (**17**):** To a solution of 544 mg (4.0 mmol) of 4-methoxybenzaldehyde in 10 mL of anhydrous ether was added 4.0 mL (4.0 mmol) of 1.0 M LiHMDS in THF at  $-10^\circ\text{C}$  under argon. The reaction mixture initially appeared milky, then quickly became a clear pale yellow solution. After 20 min, a solution of 1.83 mL (1.70 g, 6.0 mmol) of  $\text{Ti}(\text{O}i\text{-Pr})_4$  in 10 mL of anhydrous ether was added via a syringe. After stirring for 5 min, the solution was cooled to  $-78^\circ\text{C}$ , and 6.0 mL (12.0 mmol) of 2.0 M  $c\text{-C}_5\text{H}_9\text{MgCl}$  in diethyl ether was added via a syringe over 2 min. The temperature of the solution was raised to  $-40^\circ\text{C}$  over 30 min, then was stirred at  $-40^\circ\text{C}$  for an additional 1.5 h, resulting in a dark brown suspension. Next, a solution of lithium alkoxide of alcohol **16** in 4 mL of THF, prepared by deprotonation of 224 mg (2.0 mmol) of alcohol **16** at  $-78^\circ\text{C}$  with 0.88 mL (2.2 mmol) of 2.5 M  $n\text{-BuLi}$  in hexanes followed by 10 min stirring, was added to the brown solution via cannula. The mixture was warmed to room temperature over 2 h, then was stirred for 16 h. Finally, sequential addition of 10 mL of diethyl ether and 10 mL of sat. aq.  $\text{NaHCO}_3$  was followed by vigorous stirring for 1 h. The aqueous phase was separated and extracted with 30 mL of diethyl ether (2 $\times$ ). The organic extracts were combined, dried ( $\text{MgSO}_4$ ), and concentrated *in vacuo* to afford a pale yellow oil. The residue was purified by chromatography over 50 g of silica gel ( $\text{CH}_2\text{Cl}_2:\text{MeOH}:\text{NH}_4\text{OH} =$



400:10:1) to give 384 mg (83%, d.r.  $\geq$  20:1, *E:Z*  $\geq$  20:1) of homoallylic amine **17** as a colorless oil.

Data for amine **17**: IR (neat) 3585, 3247, 2958, 2838, 1614, 1594, 1515, 1455  $\text{cm}^{-1}$ ;  $^1\text{H}$  NMR ( $\text{CDCl}_3$ , 400 MHz)  $\delta$  0.20 (m, 2H,  $\text{CH}(\underline{\text{CH}_2})_2$ ), 0.53 (m, 2H,  $\text{CH}(\underline{\text{CH}_2})_2$ ), 0.61 (d,  $J = 6.8$  Hz, 3H,  $\text{CH}_3$ ), 1.23 (m, 1H,  $\text{CH}(\underline{\text{CH}_2})_2$ ), 1.42 (br, 2H,  $\text{NH}_2$ ), 2.08 (qd,  $J = 8.0, 6.8$  Hz, 1H,  $\text{CHCH}_3$ ), 3.38 (d,  $J = 8.0$  Hz, 1H,  $\text{CHNH}$ ), 3.65 (s, 3H, OMe), 4.96 (dd,  $J = 15.2, 8.8$  Hz, 1H,  $\text{CH}=\underline{\text{CH}}\text{CH}(\text{CH}_2)_2$ ), 5.24 (dd,  $J = 15.2, 8.8$  Hz, 1H,  $\text{CH}_3\text{CH}=\underline{\text{CH}}$ ), 6.70 (d,  $J = 8.8$  Hz, 2H, Ph-), 7.07 (d,  $J = 8.8$  Hz, 2H, Ph-);  $^{13}\text{C}$  NMR ( $\text{CDCl}_3$ , 100 MHz)  $\delta$  6.58 (t), 6.61 (t), 13.67 (d), 18.24 (q), 45.37 (d), 55.26 (q), 60.53 (d), 113.57 (d), 128.33 (d), 130.60 (d), 135.60 (d), 136.95 (s), 158.60 (s); LRMS ( $\text{C}_{15}\text{H}_{17}\text{NO} + \text{H}^+ - \text{NH}_3$ ) calcd  $m/z$  215.1, found  $m/z$  215.3.

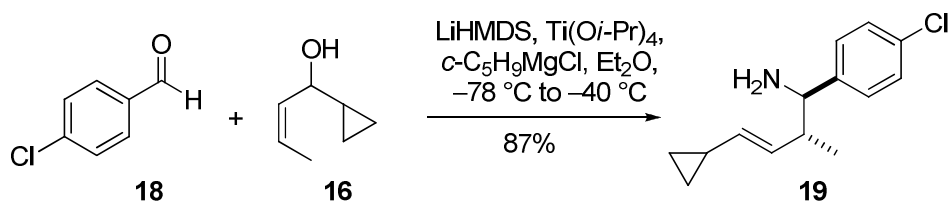

**Preparation of (±)-(1*R*,2*R*,*E*)-1-(4-chlorophenyl)-4-cyclopropyl-2-methylbut-3-en-1-amine (**19**):** To a stirred solution of 564 mg (4.0 mmol) of 4-chlorobenzaldehyde in 10 mL of anhydrous ether was added 4.0 mL (4.0 mmol) of 1.0 M LiHMDS in THF at  $-10$   $^\circ\text{C}$  under argon. The reaction mixture initially appeared milky, then quickly became a clear pale yellow solution. After 20 min, a solution of 1.83 mL (1.70 g, 6.0 mmol) of  $\text{Ti(O}i\text{-Pr)}_4$  in 10 mL of anhydrous ether was added via a syringe. After stirring for 5 min, the solution was cooled to  $-78$   $^\circ\text{C}$ , and 6.0 mL (12.0 mmol) of 2.0 M  $c\text{-C}_5\text{H}_9\text{MgCl}$  in diethyl ether was added via a syringe over 2 min. The temperature of the solution was raised to  $-40$   $^\circ\text{C}$  over 30 min, then the mixture was stirred at  $-40$   $^\circ\text{C}$  for an additional 1.5 h, resulting in a dark brown suspension. Next, a solution of lithium alkoxide of alcohol **16** in 4 mL of THF, prepared by deprotonation of 224 mg (2.0 mmol) of alcohol **16** at  $-78$   $^\circ\text{C}$  with 0.88 mL (2.2 mmol) of 2.5 M *n*-BuLi in hexanes followed by 10 min

stirring, was added to the brown solution via cannula. The mixture was warmed to room temperature over 2 h, then was stirred for 16 h. Finally, sequential addition of 10 mL of diethyl ether and 10 mL of sat. aq. NaHCO<sub>3</sub> was followed by vigorous stirring for 1 h. The aqueous phase was separated and extracted with 30 mL of diethyl ether (2×). The organic extracts were combined, dried (MgSO<sub>4</sub>), and concentrated *in vacuo* to afford a pale yellow oil. The residue was purified by chromatography over 50 g of silica gel (CH<sub>2</sub>Cl<sub>2</sub>:MeOH:NH<sub>4</sub>OH = 400:10:1) to give 410 mg (87%, d.r. ≥ 20:1, *E:Z* ≥ 20:1) of homoallylic amine **19** as a colorless oil.

Data for amine **19**: IR (neat) 3711, 3368, 2962, 1662, 1594, 1489, 1455 cm<sup>-1</sup>; <sup>1</sup>H NMR (CDCl<sub>3</sub>, 400 MHz) δ 0.21 (m, 2H, CH(CH<sub>2</sub>)<sub>2</sub>), 0.54 (m, 2H, CH(CH<sub>2</sub>)<sub>2</sub>), 0.63 (d, *J* = 6.8 Hz, 3H, CH<sub>3</sub>), 1.22 (m, 1H, CH(CH<sub>2</sub>)<sub>2</sub>), 1.42 (br, 2H, NH<sub>2</sub>), 2.06 (qd, *J* = 8.0, 6.8 Hz, 1H, CHCH<sub>3</sub>), 3.42 (d, *J* = 8.0 Hz, 1H, CHNH), 4.95 (dd, *J* = 15.2, 8.8 Hz, 1H, CH=CHCH(CH<sub>2</sub>)<sub>2</sub>), 5.21 (dd, *J* = 15.2, 8.8 Hz, 1H, CH<sub>3</sub>CH=CH), 7.12 (m, 4H, Ph-); <sup>13</sup>C NMR (CDCl<sub>3</sub>, 100 MHz) δ 6.61 (t), 6.65 (t), 13.67 (d), 18.09 (q), 45.17 (d), 60.53 (d), 128.30 (d), 128.75 (d), 130.27 (d), 132.54 (s), 136.08 (d), 143.31 (s); LRMS C<sub>14</sub>H<sub>18</sub>CIN + H<sup>+</sup> calcd *m/z* 236.1, found *m/z* 236.3.

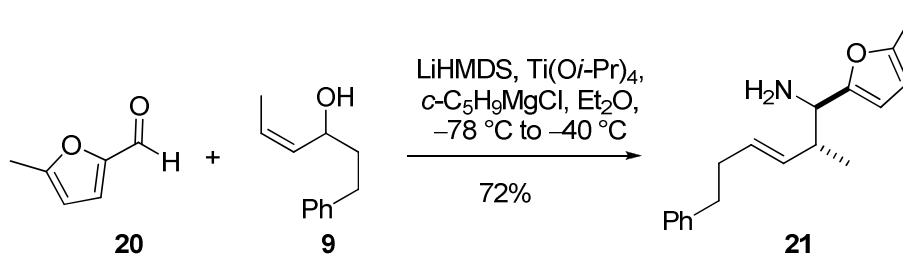

**Preparation of (±)-(1*R*,2*R*,*E*)-1-(5-methylfuran-2-yl)-2-phenethylpent-3-en-1-amine (**21**):** To a solution of 440 mg (4.0 mmol) of 5-methylfuran-2-carbaldehyde in 10 mL of anhydrous ether was added 4.0 mL (4.0 mmol) of 1.0 M LiHMDS in THF at -10 °C under argon. The reaction mixture initially appeared milky, then quickly became a clear pale yellow solution. After 20 min, a solution of 1.83 mL (1.70 g, 6.0 mmol) of Ti(Oi-Pr)<sub>4</sub> in 10 mL of anhydrous ether was added via a syringe. After stirring for 5 min, the

solution was cooled to  $-78\text{ }^{\circ}\text{C}$ , and 6.0 mL (12.0 mmol) of 2.0 M  $c\text{-C}_5\text{H}_9\text{MgCl}$  in diethyl ether was added via a syringe over 2 min. The temperature of the solution was raised to  $-40\text{ }^{\circ}\text{C}$  over 30 min, then the mixture was stirred at  $-40\text{ }^{\circ}\text{C}$  for an additional 1.5 h, resulting in a dark brown suspension. Next, a solution of lithium alkoxide of alcohol **11** in 4 mL of THF, prepared by deprotonation of 352 mg (2.0 mmol) of alcohol **11** at  $-78\text{ }^{\circ}\text{C}$  with 0.88 mL (2.2 mmol) of 2.5 M  $n\text{-BuLi}$  in hexanes followed by 10 min stirring, was added to the brown solution via cannula. The mixture was warmed to room temperature over 2 h, then was stirred for 12 h. Finally, sequential addition of 10 mL of diethyl ether and 5 mL of sat. aq.  $\text{NaHCO}_3$  was followed by vigorous stirring for 1 h. The aqueous phase was separated and extracted with 10 mL of diethyl ether (2 $\times$ ). The organic extracts were combined, dried ( $\text{MgSO}_4$ ), and concentrated *in vacuo* to afford a pale yellow oil. The residue was purified by chromatography over 50 g of silica gel ( $\text{CH}_2\text{Cl}_2\text{:MeOH:NH}_4\text{OH} = 200\text{:}10\text{:}1$ ) to give 388 mg (72%, d.r.  $\geq 20\text{:}1$ ,  $E\text{:}Z \geq 20\text{:}1$ ) of homoallylic amine **21** as a colorless oil.

Data for amine **21**: IR (neat) 3300, 2953, 1714, 1248, 824  $\text{cm}^{-1}$ ;  $^1\text{H}$  NMR ( $\text{CDCl}_3$ , 400 MHz)  $\delta$  1.30 and 1.44 (m, 2H,  $\text{PhCH}_2\text{CH}_2^-$ ), 1.50 (br, 2H,  $\text{NH}_2$ ), 1.62 (dd,  $J = 6.4, 1.6$  Hz, 3H,  $\text{CH}_3$ ), 2.10 (s, 3H,  $\text{CH}_3$ ), 2.18 (m, 1H,  $\text{CHCH}_2\text{Bn}$ ), 2.31 and 2.49 (m, 2H,  $\text{PhCH}_2$ ), 3.51 (d,  $J = 8.4$  Hz, 1H,  $\text{CHNH}_2$ ), 5.11 (m, 1H,  $\text{CH}_3\text{CH}=\text{CH}-$ ), 5.45 (qd,  $J = 12.4, 6.4$  Hz, 1H,  $\text{CH}_3\text{CH}=\text{CH}$ ), 5.70 (s, 1H, furan), 5.82 (s, 1H, furan), 7.10-7.23 (m, 5H, Ph-);  $^{13}\text{C}$  NMR ( $\text{CDCl}_3$ , 100 MHz)  $\delta$  13.56 (q), 18.17 (q), 33.33 (t), 33.42 (t), 48.70 (d), 53.50 (d), 105.70 (d), 106.68 (d), 125.56 (d), 128.18 (d), 128.27 (d), 128.40 (d), 128.96 (d), 132.10 (d), 142.51 (s), 150.87 (s), 155.43 (s); LRMS  $\text{C}_{18}\text{H}_{23}\text{NO} + \text{H}^+$  calcd  $m/z$  270.2, found  $m/z$  270.4.

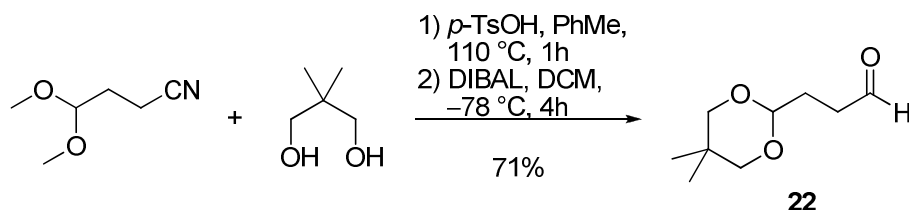

**Preparation of 3-(5,5-dimethyl-1,3-dioxan-2-yl)propanal (22):** To a solution of 6.4 g (50 mmol) of 4,4-dimethoxybutanenitrile (from TCI) in 50 mL of toluene was added 5.5 g (52.5 mmol) of 2,2-dimethylpropane-1,3-diol and 0.2 g (1.2 mmol) of *p*-TsOH. The mixture was refluxed at 110 °C for 1 h. The solution was concentrated, then was diluted with 50 mL of dichloromethane. The resulting solution was washed with 20 mL of sat. aq. NaHCO<sub>3</sub>, dried (MgSO<sub>4</sub>), and concentrated *in vacuo*. 3.4 g of the crude product was dissolved in 100 mL of dichloromethane. To the resulting solution was added 34 mL (34 mmol) of 1.0 M DIBAL in hexanes at –78 °C under argon. After stirring for 2 h, 2 mL of MeOH and 20 mL of sat. aq. Rochelle’s salt were sequentially added. The resulting white suspension was stirred overnight. The aqueous phase was extracted with 50 mL of dichloromethane (2×). The combined organic phases were dried (MgSO<sub>4</sub>), concentrated, and chromatographed over 100 g of silica gel with 20% ethyl acetate-hexanes as eluent. 2.4 g (71%) of aldehyde **22** was isolated as a water white oil.

Data for aldehyde **22**: IR (neat) 2955, 2848, 1724, 1472, 1394, 1139 cm<sup>-1</sup>; <sup>1</sup>H NMR (CDCl<sub>3</sub>, 400 MHz) δ 0.71 (s, 3H, CH<sub>3</sub>), 1.17 (s, 3H, CH<sub>3</sub>), 1.99 (td, *J* = 7.2, 4.4 Hz, 2H, CH<sub>2</sub>), 2.59 (td, *J* = 7.2, 1.6 Hz, 2H, CH<sub>2</sub>CHO), 3.42 and 3.58 (ABq, *J* = 10.8 Hz, 4H, 2× OCH<sub>2</sub>), 4.51 (t, *J* = 4.4 Hz, 1H, CH(OR)<sub>2</sub>), 9.77 (t, *J* = 1.6 Hz, 1H, CHO); <sup>13</sup>C NMR (CDCl<sub>3</sub>, 100 MHz) δ 21.77 (q), 22.92 (q), 27.41 (t), 30.05 (s), 38.04 (t), 77.20 (t), 100.41 (d), 202.10 (d); LRMS C<sub>9</sub>H<sub>16</sub>O<sub>3</sub> + H<sup>+</sup> calcd *m/z* 173.1, found *m/z* 173.3.

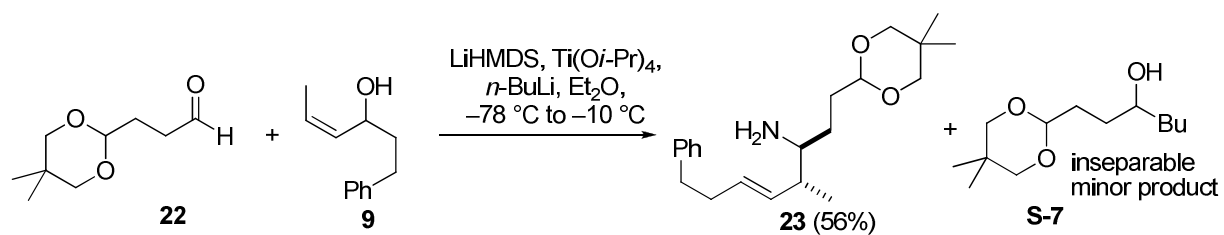

**Preparation of (±)-(3*S*,4*R*,*E*)-1-(5,5-dimethyl-1,3-dioxan-2-yl)-4-methyl-8-phenyloct-5-en-3-amine (**23**):**

Flask A: To a solution of 688 mg (4.0 mmol) of aldehyde **22** in 10 mL of anhydrous ether was added 4.0 mL (4.0 mmol) of 1.0 M LiHMDS in THF at -78 °C under argon. The resulting pale yellow solution was stirred for 20 min, then was cannulated into flask B. (see below)

Flask B: To a solution of 1.22 mL (1.14 g, 4.0 mmol) of Ti(O*i*-Pr)<sub>4</sub> in 16 mL of anhydrous ether was added 3.2 mL (8.0 mmol) of 2.5 M *n*-BuLi in hexanes at -78 °C under argon. The temperature of the reaction was allowed to raise to -40 °C over 20 min, resulting in an orange solution. To the reaction mixture was introduced *N*-TMS imine prepared in flask A (described above) via cannula. The temperature of the reaction was raised to -10 °C over 1 h, then was kept at -10 °C for 20 min, resulting in a wine-red solution. Next, a solution of lithium alkoxide of alcohol **9** in 4 mL of THF, prepared by deprotonation of 352 mg (2.0 mmol) of alcohol **9** at -78 °C with 0.88 mL (2.2 mmol) of 2.5 M *n*-BuLi in hexanes followed by 10 min stirring, was added to the wine-red solution via cannula. The mixture was warmed to room temperature over 2 h, then was stirred at room temperature for 12 h. Finally, 10 mL of diethyl ether and 5 mL of sat. aq. NaHCO<sub>3</sub> were added sequentially and the resulting solution was stirred vigorously for 1 h. The aqueous phase was separated and extracted with 10 mL of diethyl ether (2×). The organic extracts were combined, dried (MgSO<sub>4</sub>), and concentrated *in vacuo* to afford a pale yellow oil. The residue was purified by chromatography over 50 g of silica gel (CH<sub>2</sub>Cl<sub>2</sub>:MeOH:NH<sub>4</sub>OH = 100:10:1) to give an inseparable mixture containing 370 mg (56%) of homoallylic amine **23** and 64 mg of amine **S-7** as a colorless oil.

Data for amine **23**:  $^1\text{H}$  NMR ( $\text{CDCl}_3$ , 400 MHz)  $\delta$  0.72 (s, 3H,  $\text{CH}_3$ ), 0.99 (d,  $J = 6.8$  Hz, 3H,  $\text{CHCH}_3$ ), 1.19 (s, 3H,  $\text{CH}_3$ ), 1.68 (m, 4H,  $(\text{CH}_2)_2$ ), 2.03 (m, 1H,  $\text{CHCH}_3$ ), 2.34 (td,  $J = 8.0, 7.2$  Hz, 2H,  $\text{BnCH}_2$ ), 2.44 (m, 1H,  $\text{CHNH}_2$ ), 2.68 (t,  $J = 7.2$  Hz, 2H,  $\text{PhCH}_2$ ), 3.42 and 3.50 (ABq,  $J = 10.4$  Hz, 4H, 2 x  $\text{OCH}_2$ ), 4.41 (t,  $J = 4.8$  Hz, 1H,  $\text{CH}(\text{OR})_2$ ), 5.27 (m, 1H,  $-\text{CH}_2\text{CH}=\text{CH}$ ), 5.84 (td,  $J = 13.2, 6.8$  Hz, 1H,  $-\text{CH}_2\text{CH}=\text{CH}$ ), 7.15 - 7.26 (m, 5H, Ph-).

Data for the minor product **S-7**:  $^1\text{H}$  NMR ( $\text{CDCl}_3$ , 400 MHz)  $\delta$  0.72 (s, 3H,  $\text{CH}_3$ ), 0.90 (t,  $J = 7.2$  Hz, 3H,  $\text{CH}_3$ ), 1.19 (s, 3H,  $\text{CH}_3$ ), 1.57 (m, 8H,  $(\text{CH}_2)_4\text{CH}_3$ ), 1.71 (m, 4H,  $(\text{CH}_2)_2$ ), 2.69 (m, 1H,  $\text{CHNH}$ ), 3.42 and 3.50 (ABq,  $J = 10.4$  Hz, 4H,  $\text{OCH}_2$ ), 4.30 (t,  $J = 4.8$  Hz,  $\text{CH}(\text{OR})_2$ );  $^{13}\text{C}$  NMR ( $\text{CDCl}_3$ , 100 MHz)  $\delta$  14.10 (q), 21.85 (q), 22.84 (t), 23.00 (q), 28.33 (t), 30.15 (s), 31.54 (t), 32.31 (t), 37.76 (t), 51.06 (d), 77.23 (t), 102.27 (d); LRMS  $\text{C}_{13}\text{H}_{27}\text{NO}_2 + \text{H}^+$  calcd  $m/z$  230.2 found  $m/z$  230.4.

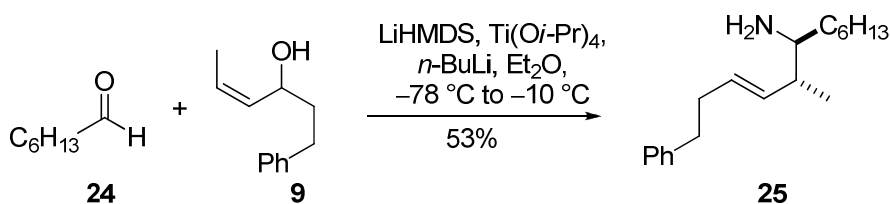

### Preparation of (±)-(5*R*,6*S*,*E*)-5-methyl-1-phenyldodec-3-en-6-amine (**25**):

Flask A: To a solution of 456 mg (4.0 mmol) of heptaldehyde in 10 mL of anhydrous ether was added 4.0 mL (4.0 mmol) of 1.0 M LiHMDS in THF at  $-78$  °C under argon. The resulting pale yellow solution was stirred for 20 min, then was cannulated into flask B. (see below)

Flask B: To a solution of 1.22 mL (1.14 g, 4.0 mmol) of Ti(O*i*-Pr)<sub>4</sub> in 16 mL of anhydrous ether was added 3.2 mL (8.0 mmol) of 2.5 M *n*-BuLi in hexanes at  $-78$  °C under argon. The temperature of the reaction was allowed to rise to  $-50$  °C over 20 min, resulting in an orange solution. To the reaction mixture was introduced the *N*-TMS imine prepared in flask A (described above) via cannula. The temperature of the reaction was raised to  $-10$  °C over 1 h, and then was kept at  $-10$  °C for 20 min, resulting in a wine-red solution.

Next, a solution of lithium alkoxide of alcohol **9** in 4 mL of THF, prepared by deprotonation of 352 mg (2.0 mmol) of alcohol **9** at  $-78\text{ }^{\circ}\text{C}$  with 0.88 mL (2.2 mmol) of 2.5 M *n*-BuLi in hexanes followed by 10 min stirring, was added to the wine-red solution via cannula. The mixture was warmed to room temperature over 2 h, then stirred for 12 h. Finally, 10 mL of diethyl ether and 5 mL of sat. aq.  $\text{NaHCO}_3$  were added and the resulting solution was stirred vigorously for 1 h. The aqueous phase was separated and extracted with 10 mL of diethyl ether (2 $\times$ ). The organic extracts were combined, dried ( $\text{MgSO}_4$ ), and concentrated *in vacuo* to afford a pale yellow oil. The residue was purified by chromatography over 50 g of silica gel ( $\text{CH}_2\text{Cl}_2:\text{MeOH}:\text{NH}_4\text{OH} = 200:10:1$ ) to give 270 mg (53%, d.r.  $\geq 20:1$ , *E:Z*  $\geq 20:1$ ) of homoallylic amine **25** as a colorless oil.

Data for amine **25**: IR (neat) 3027, 2927, 1603, 1497, 1455, 1377  $\text{cm}^{-1}$ ;  $^1\text{H}$  NMR ( $\text{CDCl}_3$ , 400 MHz)  $\delta$  0.74 (t,  $J = 6.8$  Hz, 3H,  $\text{CH}_3(\text{CH}_2)_5$ ), 0.81 (dd,  $J = 6.4, 1.2$  Hz, 3H,  $\text{CH}_3$ ), 1.13 (br, 10 H,  $\text{CH}_3(\text{CH}_2)_5$ ), 1.24 (br, 2H,  $\text{NH}_2$ ), 1.88 (m, 1H,  $\text{CHCH}_3$ ), 2.20 (td,  $J = 7.2, 6.8$  Hz, 2H,  $\text{BnCH}_2$ ), 2.30 (m, 1H,  $\text{C}_6\text{H}_{13}\text{CH}$ ), 2.55 (t,  $J = 7.6$  Hz, 2H,  $\text{PhCH}_2$ ), 5.12 (dd,  $J = 14.4, 7.2$  Hz, 1H,  $-\text{CH}_2\text{CH}=\text{CH}-$ ), 5.32 (td,  $J = 15.2, 6.8$  Hz, 1H,  $-\text{CH}_2\text{CH}=\text{CH}$ ), 7.03-7.12 (m, 5H, Ph-);  $^{13}\text{C}$  NMR ( $\text{CDCl}_3$ , 100 MHz)  $\delta$  14.11 (q), 17.35 (q), 22.66 (t), 26.27 (t), 29.51 (t), 31.88 (t), 34.47 (t), 34.79 (t), 35.99 (t), 42.68 (d), 55.55 (d), 125.75 (d), 128.25 (d), 128.53 (d), 130.38 (d), 133.33 (d), 141.91 (s); LRMS  $\text{C}_{19}\text{H}_{31}\text{N} + \text{H}^+$  calcd  $m/z$  274.3, found  $m/z$  274.5.

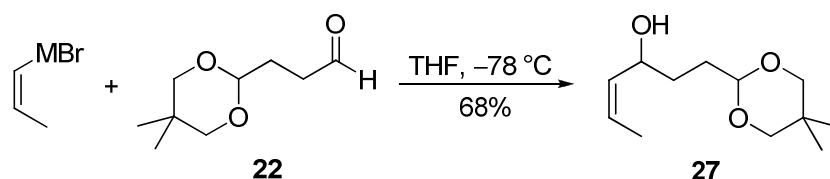

**Preparation of (*Z*)-1-(5,5-dimethyl-1,3-dioxan-2-yl)hex-4-en-3-ol (**27**):** To a flame-dried 50 mL 3-neck round bottom flask was charged 600 mg (25.0 mmol) of magnesium turnings and 2 mg of iodine under argon. After introduction of 10 mL of anhydrous THF, the mixture was heated with a heat gun until the color changed from brown to water white. A solution of 0.62 g (5.0 mmol) of (*Z*)-1-bromopropene in 20 mL of anhydrous

THF was added via a syringe at a rate to maintain reflux. After stirring for an additional 2 h at 60 °C, the Grignard solution prepared was cooled to rt, and then was cannulated into a solution of 688 mg (4.0 mmol) of aldehyde **22** in 10 mL of anhydrous THF at -78 °C under argon. After stirring for 2 h, 10 mL of sat. aq. NH<sub>4</sub>Cl was added. The aqueous phase was extracted with 10 mL of diethyl ether (2×). The organic extracts were combined, dried (MgSO<sub>4</sub>), and concentrated *in vacuo* to afford a pale yellow oil. The residue was purified by chromatography over 50 g of silica gel (10% ethyl acetate in hexanes) to give 580 mg (68%, d.r. ≥ 20:1, *Z:E* ≥ 20:1) of alcohol **27** as a water white oil.

Data for alcohol **27**: IR (neat) 3418, 2593, 2849, 1659, 1471, 1394 cm<sup>-1</sup>; <sup>1</sup>H NMR (CDCl<sub>3</sub>, 400 MHz) δ 0.74 (s, 3H, CH<sub>3</sub>), 1.21 (s, 3H, CH<sub>3</sub>), 1.72 (m, 4H, (CH<sub>2</sub>)<sub>2</sub>), 1.73 (d, *J* = 6.8 Hz, 3H, CH<sub>3</sub>), 2.01 (d, *J* = 4.0 Hz, 1H, OH), 3.44 and 3.63 (ABq, *J* = 10.4 Hz, 4H, 2× OCH<sub>2</sub>), 4.51 (t, *J* = 4.4 Hz, 1H, CH(OR)<sub>2</sub>), 4.53 (m, 1H, CHOH), 5.43 (m, 1H, CH=CHCH<sub>3</sub>), 5.59 (qd, 1H, CH=CHCH<sub>3</sub>); <sup>13</sup>C NMR (CDCl<sub>3</sub>, 100 MHz) δ 13.31 (q), 21.83 (q), 23.01 (q), 30.12 (s), 30.82 (t), 31.66 (t), 67.22 (d), 101.99 (d), 126.16 (d), 133.31 (d); LRMS C<sub>12</sub>H<sub>22</sub>O<sub>3</sub> + H<sup>+</sup> calcd *m/z* 215.2, found *m/z* 215.4.

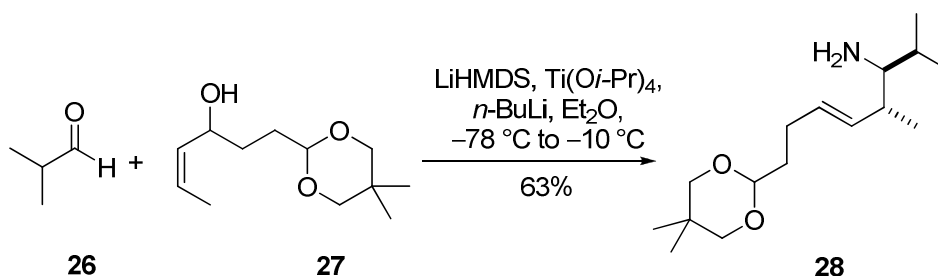

### Preparation of (±)-(3*S*,4*R*,*E*)-8-(5,5-dimethyl-1,3-dioxan-2-yl)-2,4-dimethyloct-5-en-3-amine (**28**):

Flask A: To a solution of 288 mg (4.0 mmol) of isobutyraldehyde in 10 mL of anhydrous ether was added 4.0 mL (4.0 mmol) of 1.0 M LiHMDS in THF at -78 °C under argon. The resulting pale yellow solution was stirred for 20 min, then was cannulated into flask B. (see below)



Flask B: To a solution of 1.22 mL (1.14 g, 4.0 mmol) of  $\text{Ti}(\text{O}i\text{-Pr})_4$  in 16 mL of anhydrous ether was added 3.2 mL (8.0 mmol) of 2.5 M *n*-BuLi in hexanes at  $-78\text{ }^\circ\text{C}$  under argon. The temperature of the reaction was allowed to rise to  $-40\text{ }^\circ\text{C}$  over 20 min, resulting in an orange solution. To the reaction mixture was introduced the *N*-TMS imine prepared in flask A (discussed above) via cannula. The temperature of the reaction was raised to  $-10\text{ }^\circ\text{C}$  over 1 h, and then was kept at  $-10\text{ }^\circ\text{C}$  for 20 min, resulting in a wine-red solution. Next, a solution of lithium alkoxide of alcohol **27** in 4 mL of THF, prepared by deprotonation of 428 mg (2.0 mmol) of alcohol **27** at  $-78\text{ }^\circ\text{C}$  with 0.88 mL (2.2 mmol) of 2.5 M *n*-BuLi in hexanes followed by 10 min stirring, was added to the wine-red solution via cannula. The mixture was warmed to room temperature over 2 h, and then was stirred for 12 h. Finally, 10 mL of diethyl ether and 5 mL of saturated aqueous  $\text{NaHCO}_3$  were added and the resulting solution was stirred vigorously for 1 h. The aqueous phase was separated and extracted with 10 mL of diethyl ether (2 $\times$ ). The organic extracts were combined, dried ( $\text{MgSO}_4$ ), and concentrated *in vacuo* to afford a pale yellow oil. The residue was purified by chromatography over 50 g of silica gel ( $\text{CH}_2\text{Cl}_2:\text{MeOH}:\text{NH}_4\text{OH} = 200:10:1$ ) to give 343 mg (63%, d.r.  $\geq 20:1$ , *E:Z*  $\geq 20:1$ ) of homoallylic amine **28** as a colorless oil.

Data for amine **28**: IR (neat) 3391, 2956, 2847, 1615, 1471  $\text{cm}^{-1}$ ;  $^1\text{H}$  NMR ( $\text{CDCl}_3$ , 400 MHz)  $\delta$  0.65 (s, 3H,  $\text{CH}_3$ ), 0.79 (d,  $J = 6.8$  Hz, 3H,  $\text{CH}_3$ ), 0.87 (d,  $J = 6.8$  Hz, 3H,  $\text{CH}(\text{CH}_3)_2$ ), 0.90 (d,  $J = 6.8$  Hz, 3H,  $\text{CH}(\text{CH}_3)_2$ ), 1.05 (br, 2H,  $\text{NH}_2$ ), 1.12 (s, 3H,  $\text{CH}_3$ ), 1.62 (m, 1H,  $\text{CHCH}_3$ ), 1.65 (m, 2H,  $\text{CH}_2\text{CH}(\text{OR})_2$ ), 2.08 (m, 2H,  $=\text{CHCH}_2$ ), 2.09 (m, 1H,  $\text{CH}(\text{CH}_3)_2$ ), 2.18 (d,  $J = 8.8$  Hz, 1H,  $\text{CHNH}$ ), 3.34 and 3.53 (ABq,  $J = 12.8$  Hz, 4H,  $(-\text{OCH}_2)_2$ ), 4.35 (t,  $J = 4.8$  Hz, 1H,  $\text{CH}(\text{OR})_2$ ), 5.26 (dd,  $J = 15.2, 8.4$  Hz, 1H,  $-\text{CH}=\text{CHCHCH}_3$ ), 5.39 (td,  $J = 15.2, 6.4$  Hz, 1H,  $\text{CH}_2\text{CH}=\text{CH}$ );  $^{13}\text{C}$  NMR ( $\text{CDCl}_3$ , 100 MHz)  $\delta$  16.31 (q), 18.22 (q), 20.74 (q), 21.86 (q), 22.98 (q), 27.14 (t), 29.92 (d), 30.17 (s), 34.70 (t), 40.59 (d), 60.72 (d), 77.24 (t), 101.67 (d), 130.32 (d), 133.52 (d); LRMS  $\text{C}_{16}\text{H}_{31}\text{NO}_2 + \text{H}^+$  calcd  $m/z$  270.4, found  $m/z$  270.4.

**Procedure for the preparation of nitron cyclization products in Figure 3:**

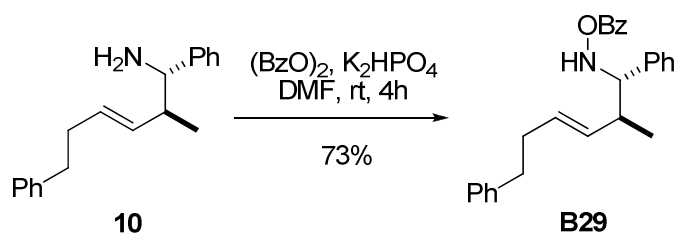

**Preparation of (±)-O-benzoyl-N-((1S,2S,E)-2-methyl-1,6-diphenylhex-3-enyl)-hydroxylamine (B29):** The general procedure of *N*-oxidation was based on work reported by Johnson *et al.*<sup>7</sup> To a suspension of 309 mg (1.28 mmol) of dibenzoyl peroxide and 277 mg (1.59 mmol) of dipotassium hydrogen phosphate in 10 mL of DMF was added a solution of 282 mg (1.14 mmol) of amine **10** in 2 mL of DMF under argon. The suspension was stirred at room temperature for 16 h. When the reaction appeared complete by TLC, 21 mg (0.26 mmol) of piperidine was added and stirred for 10 min to remove excess dibenzoyl peroxide. (Note: Dibenzoyl peroxide and benzoylamine **B29** are inseparable via column chromatography.) The mixture was poured into 50 mL of deionized water and stirred for 30 min until the suspension turned clear. The mixture was extracted with 50 mL of ethyl acetate (2×). The organic phase was washed with 50 mL of sat. aq. NaHCO<sub>3</sub> solution and 50 mL of brine, dried (MgSO<sub>4</sub>), and concentrated *in vacuo*. The residue was purified by flash chromatography over 50 g of silica gel, eluting with 5% ethyl acetate in hexanes to give 299 mg (73%) of benzoylamine **B29** as a colorless oil.

Data for benzoylamine **B29**: IR (neat) 3233, 3028, 1721, 1602, 1495, 1453 cm<sup>-1</sup>; <sup>1</sup>H NMR (CDCl<sub>3</sub>, 400 MHz) δ 0.73 (d, *J* = 6.8 Hz, 3H, CH<sub>3</sub>), 2.36 (m, 2H, -CH<sub>2</sub>CH<sub>2</sub>Ph), 1.51 (br, 1H, NH), 2.45 (qd, *J* = 9.2, 7.2 Hz, 1H, CH<sub>3</sub>CH), 2.69 (t, *J* = 7.6 Hz, 2H, -CH<sub>2</sub>Ph), 3.70 (dd, *J* = 9.2, 2.8 Hz, 1H, CHNH), 5.38 (m, 1H, CH<sub>2</sub>CH=CH-), 5.65 (td, *J* = 15.6, 6.4 Hz, 1H, CH<sub>2</sub>CH=CH), 7.07-7.29 (m, 10H, Ph-), 7.43, 7.74 and 7.95 (m, 5H, C<sub>6</sub>H<sub>5</sub>CO); <sup>13</sup>C NMR (CDCl<sub>3</sub>, 100 MHz) δ 18.13 (q), 34.38 (t), 35.81 (t), 41.14 (d), 70.13 (d), 125.79 (d), 127.59 (d), 128.10 (d), 128.26 (d), 128.30 (s), 128.40 (d), 128.54 (d), 129.26 (d), 132.11 (d), 132.89 (d), 133.14 (d), 139.91 (s), 141.83 (s), 166.75 (s); LRMS C<sub>26</sub>H<sub>27</sub>NO<sub>2</sub> + H<sup>+</sup> calcd *m/z* 386.2, found *m/z* 386.4.

Note: All benzoylamines prepared in this paper could be quantitatively hydrolyzed to their corresponding hydroxylamines (monitored by  $^1\text{H}$  NMR) upon treatment with hydrazine hydrate in ethanol at ambient temperature for 2-12 h.<sup>8</sup> However, as hydroxylamines were easily oxidized to oximes by air, or decomposed on silica gel, all of them were prepared and used immediately without purification. Each benzoylamine of corresponding hydroxylamine # is labeled as **B#**.

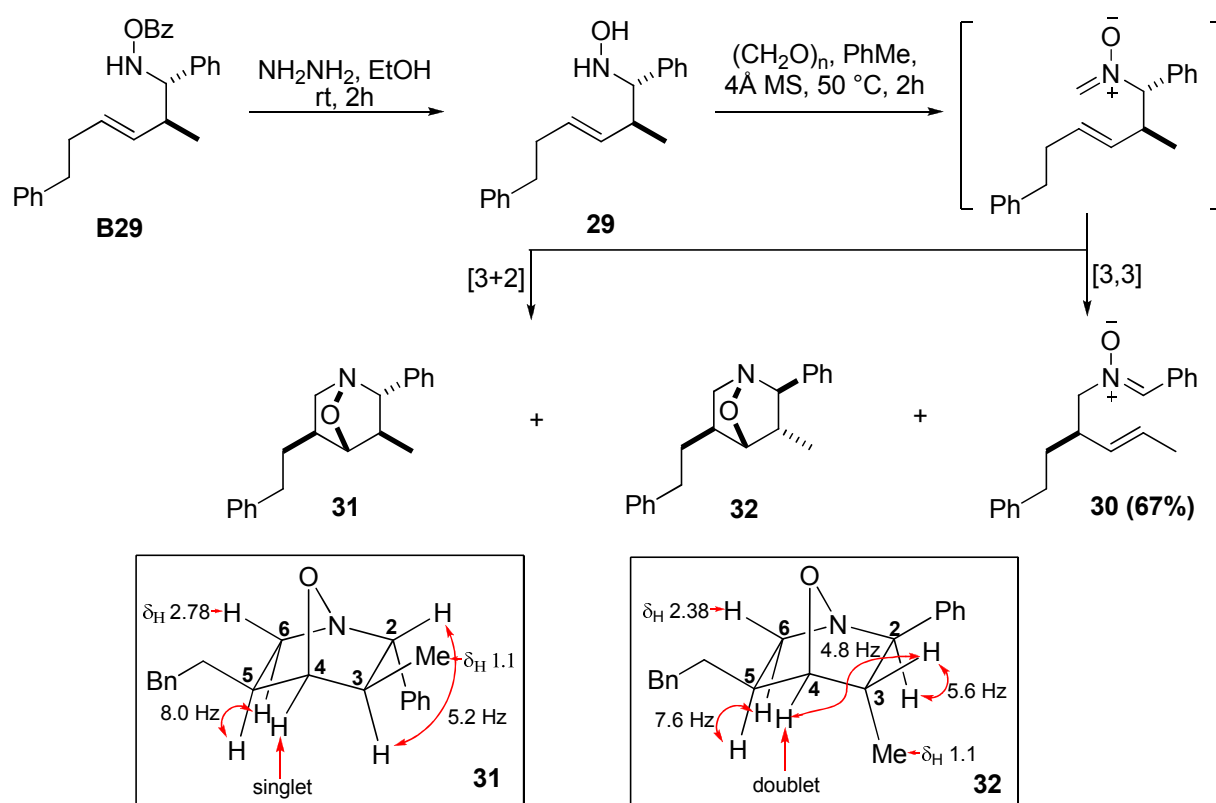

**Preparation of (*R*,3*E*,*NZ*)-*N*-benzylidene-2-phenethylpent-3-en-1-amine oxide (**30**), ( $\pm$ )-(2*S*,3*R*,4*S*,5*S*)-3-methyl-5-phenethyl-2-phenyl-7-oxa-1-azabicyclo[2.2.1]-heptanes (**31**) and ( $\pm$ )-(2*R*,3*S*,4*S*,5*S*)-3-methyl-5-phenethyl-2-phenyl-7-oxa-1-azabicyclo[2.2.1]heptanes (**32**):** To a solution of 100 mg (0.27 mmol) of benzoylamine **B29** in 10 mL of degassed anhydrous ethanol was added 0.5 mL of hydrazine hydrate under argon. After stirring for 4 h, the crude solution was concentrated *in vacuo*, then dissolved in 10 mL of dichloromethane under argon. The dichloromethane solution was

concentrated *in vacuo* again, then was dissolved in 10 mL of anhydrous toluene under argon. The prepared solution of hydroxylamine in toluene was added into a 25 mL sealed tube with 0.5 g of activated 4 Å molecular sieves and 42 mg (1.4 mmol) of paraformaldehyde. The reaction was heated at 50 °C for 2 h before cooling down to room temperature. The crude solution was concentrated *in vacuo*. The residue was purified by chromatography over 10 g of silica gel (20% ethyl acetate in hexanes) to give 53 mg (67%, *E:Z* ≥ 20:1) of **30** together with 13 mg (17%) of an inseparable mixture of **31** and **32** (**31** : **32** = 2.5 : 1).

Data for nitrone (**30**): IR (neat) 3060, 2935, 2855, 1670, 1566, 1494, 1454 cm<sup>-1</sup>; <sup>1</sup>H NMR (CDCl<sub>3</sub>, 400 MHz) δ 1.59 and 1.83 (m, 2H, PhCH<sub>2</sub>CH<sub>2</sub>), 1.58 (dd, *J* = 6.4, 1.6 Hz, 3H, CH<sub>3</sub>), 2.59 and 2.75 (m, 2H, PhCH<sub>2</sub>), 2.99 (m, 1H, CHCH<sub>3</sub>), 3.67 (ABq, *J* = 12.0, 8.0 Hz, 1H, CH<sub>2</sub>NO), 3.87 (ABq, *J* = 12.0, 6.4 Hz, 1H, CH<sub>2</sub>NO), 5.27 (m, 1H, CH=CHCHR), 5.65 (qd, *J* = 15.2, 6.4 Hz, 1H, CH<sub>3</sub>CH=CH), 7.17 (s, 1H, ClC<sub>6</sub>H<sub>4</sub>CH=N), 7.19-7.28 (m, 5H, Ph-), 7.43 and 8.22 (m, 5H, C<sub>6</sub>H<sub>5</sub>CH=N); <sup>13</sup>C NMR (CDCl<sub>3</sub>, 100 MHz) δ 18.06 (q), 33.42 (t), 34.18 (t), 40.95 (d), 72.01 (t), 125.85 (d), 128.38 (d), 128.40 (s), 128.46 (d), 128.54 (d), 129.15 (d), 130.26 (d), 130.39 (s), 130.43 (d), 134.72 (d), 142.04 (s); LRMS C<sub>20</sub>H<sub>23</sub>NO + H<sup>+</sup> calcd *m/z* 294.2, found *m/z* 294.5.

Data for oxazabicyclo[2.2.1]heptanes **31**: <sup>1</sup>H NMR (CDCl<sub>3</sub>, 400 MHz) δ 1.10 (d, *J* = 7.2 Hz, 3H, CH<sub>3</sub>), 1.51 and 1.74 (m, 2H, PhCH<sub>2</sub>CH<sub>2</sub>), 1.78 (m, 1H, C(5)H), 2.02 (dq, *J* = 7.2, 5.2 Hz, 1H, C(3)HCH<sub>3</sub>), 2.38 (ABq, *J* = 12.0, 3.2 Hz, 1H, C(6)H<sub>2</sub>), 2.52 (t, *J* = 8.0 Hz, 2H, PhCH<sub>2</sub>), 2.92 (ABq, *J* = 11.6, 7.6 Hz, 1H, C(6)H<sub>2</sub>), 4.04 (d, *J* = 5.2 Hz, 1H, C(2)H), 4.14 (s, 1H, C(4)H), 7.10-7.23 (m, 10H, Ph-).

Data for oxazabicyclo[2.2.1]heptanes **32**: <sup>1</sup>H NMR (CDCl<sub>3</sub>, 400 MHz) δ 1.10 (d, *J* = 7.2 Hz, 3H, CH<sub>3</sub>), 1.62 and 1.82 (m, 2H, PhCH<sub>2</sub>CH<sub>2</sub>), 2.23 (dq, *J* = 7.2, 5.2 Hz, 1H, C(3)HCH<sub>3</sub>), 2.27 (m, 1H, C(5)H), 2.59 (m, 2H, PhCH<sub>2</sub>), 2.76 (ABq, *J* = 11.6, 4.8 Hz, 1H, C(6)H<sub>2</sub>), 3.00 (ABq, *J* = 11.2, 8.0 Hz, 1H, C(6)H<sub>2</sub>), 3.06 (d, *J* = 5.6 Hz, 1H, C(2)H), 4.39 (d, *J* = 4.8 Hz, 1H, C(4)H), 7.10-7.23 (m, 10H, Ph-).

Note: As the minor products **31** and **32** were inseparable, only <sup>1</sup>H NMR and <sup>1</sup>H-<sup>1</sup>H COSY were conducted. The structures were assigned based on their coupling constants and comparison with similar compounds.

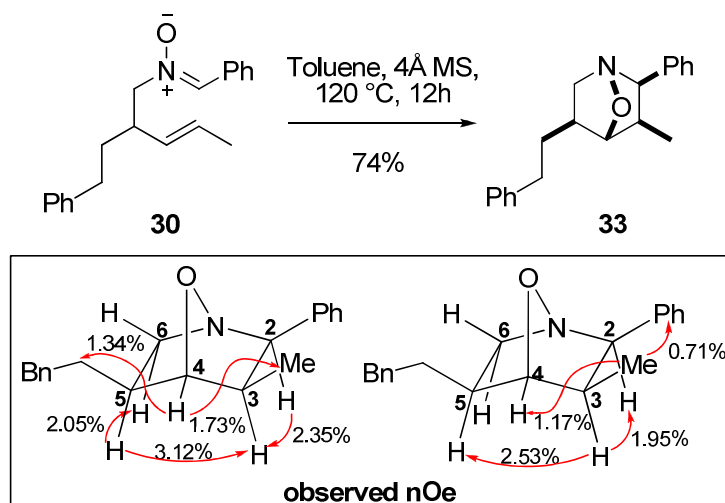

**Preparation of (±)-(2*S*,3*S*,4*R*,5*R*)-3-methyl-5-phenethyl-2-phenyl-7-oxa-1-azabicyclo-[2.2.1]-heptanes (33):** To a 25 mL sealed tube with 0.5 g of activated 4 Å molecular sieves was added a solution of 50 mg (0.19 mmol) of nitron **30** in 10 mL of anhydrous toluene. The reaction was heated at 120 °C for 12 h before cooled down to room temperature. The crude was concentrated *in vacuo*. The residue was purified by chromatography over 10 g of silica gel (5% ethyl acetate in hexanes) to give 37 mg (74%, d.r. ≥ 20:1) of oxazabicyclo[2.2.1]heptane **33** as a colorless oil. No evidence were found for the production of other isomeric product.

Data for oxazabicyclo[2.2.1]heptane **33**: IR (neat) 3061, 2929, 1657, 1494, 1452 cm<sup>-1</sup>; <sup>1</sup>H NMR (CDCl<sub>3</sub>, 400 MHz) δ 0.45 (d, *J* = 7.2 Hz, 3H, CH<sub>3</sub>), 1.57 and 1.82 (m, 2H, PhCH<sub>2</sub>CH<sub>2</sub>), 1.93 (m, 1H, C(5)H), 2.26 (dq, *J* = 8.0, 7.2 Hz, 1H, C(3)HCH<sub>3</sub>), 2.58 (m, 2H, PhCH<sub>2</sub>), 2.74 (ABq, *J* = 11.6, 4.8 Hz, 1H, C(6)H<sub>2</sub>NO), 3.00 (ABq, *J* = 11.6, 8.0 Hz, 1H, C(6)H<sub>2</sub>NO), 3.88 (d, *J* = 8.0 Hz, 1H, C(2)HNO), 4.08 (s, 1H, C(4)H), 7.10-7.23 (m, 10H, Ph-); <sup>13</sup>C NMR (CDCl<sub>3</sub>, 100 MHz) δ 16.13 (q), 34.13 (t), 35.63 (t), 45.27 (d), 45.27 (d), 63.37 (t), 74.13 (d), 89.03 (d), 125.97 (d), 126.48 (d), 127.60 (d), 127.82 (d), 128.44 (d), 128.46 (s), 139.44 (s), 141.70 (s); HRMS C<sub>20</sub>H<sub>23</sub>NO + H<sup>+</sup> calcd *m/z* 294.1858, found *m/z* 294.1856.

**Procedure for the preparation of substituted 1-aza-7-oxabicyclo[2.2.1]heptanes listed in Table 2:**

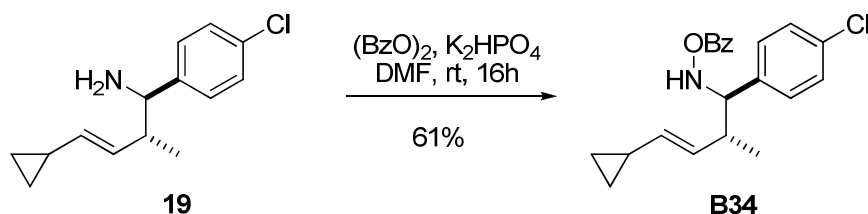

**Preparation of (±)-O-benzoyl-N-((1*R*,2*R*,*E*)-1-(4-chlorophenyl)-4-cyclopropyl-2-methylbut-3-enyl)hydroxylamine (**B34**):** To a suspension of 510 mg (2.1 mmol) of dibenzoyl peroxide and 454 mg (2.61 mmol) of dipotassium hydrogen phosphate in 15 mL of DMF was added a solution of 350 mg (1.48 mmol) of amine **19** in 3 mL of DMF under argon. The suspension was stirred at room temperature for 16 h. When the reaction was judged complete by TLC, 26 mg (0.3 mmol) of piperidine was added and the resulting solution was stirred for 10 min to remove excess dibenzoyl peroxide. (Note: Dibenzoyl peroxide benzoylamine **B34** are inseparable via column chromatography.) The mixture was poured into 50 mL of deionized water and stirred for 30 min until the suspension turned clear. The mixture was extracted with 50 mL of ethyl acetate (2×). The organic phase was washed with 50 mL of sat. aq. NaHCO<sub>3</sub> solution and 50 mL of brine, dried (MgSO<sub>4</sub>), and concentrated *in vacuo*. The residue was purified by flash chromatography with 50 g of silica gel, eluting with 2.5% ethyl acetate in hexanes to give 320 mg (61%) of benzoylamine **B34** as a colorless oil.

Data for benzoylamine **B34**: IR (neat) 3229, 3063, 2858, 1720, 1585, 1451 cm<sup>-1</sup>; <sup>1</sup>H NMR (CDCl<sub>3</sub>, 400 MHz) δ 0.34 (m, 2H, CH(CH<sub>2</sub>)<sub>2</sub>), 0.66 (m, 2H, CH(CH<sub>2</sub>)<sub>2</sub>), 0.74 (d, *J* = 6.8 Hz, 3H, CH<sub>3</sub>), 1.37 (m, 1H, CH(CH<sub>2</sub>)<sub>2</sub>), 1.50 (s, 1H, NH), 2.39 (qd, *J* = 8.0, 6.0 Hz, 1H, CHCH<sub>3</sub>), 3.69 (dd, *J* = 13.2, 3.6 Hz, 1H, CHNH), 5.14 (dd, *J* = 15.2, 8.4 Hz, 1H, CH=CHCH(CH<sub>2</sub>)<sub>2</sub>), 5.41 (dd, *J* = 15.2, 8.8 Hz, 1H, CH<sub>3</sub>CH=CH), 7.12 (m, 4H, Ph-), 7.46, 7.74 and 8.04 (m, 5H, C<sub>6</sub>H<sub>5</sub>CO); <sup>13</sup>C NMR (CDCl<sub>3</sub>, 100 MHz) δ 6.73 (t), 6.77 (t), 13.59 (d), 18.16 (q), 41.14 (d), 69.63 (d), 128.36 (d), 128.45 (s), 128.46 (d), 128.98 (d), 129.25 (d), 129.41 (d), 133.26 (d), 137.14 (d), 138.70 (s), 166.76 (s); LRMS C<sub>21</sub>H<sub>23</sub>ClNO<sub>2</sub> + H<sup>+</sup> calcd *m/z* 356.1, found *m/z* 356.4.

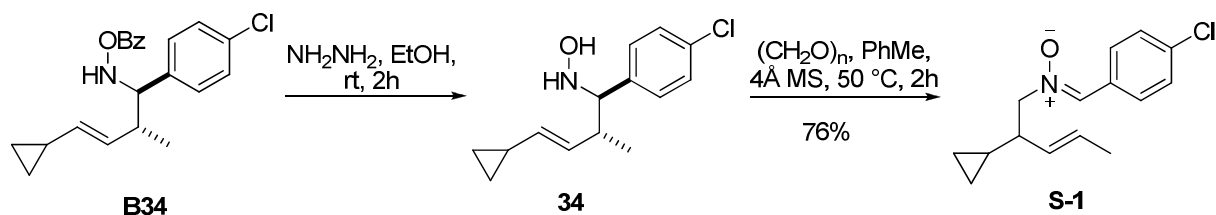

**Preparation of (3*E*,*NZ*)-*N*-(4-chlorobenzylidene)-2-cyclopropylpent-3-en-1-amine oxide (S-1):**

To a solution of 114 mg (0.32 mmol) of benzoylamine **B34** in 10 mL of degassed anhydrous ethanol was added 0.2 mL of hydrazine hydrate under argon. After stirring for 4 h, the crude solution was concentrated *in vacuo*, then dissolved in 10 mL of dichloromethane under argon. The dichloromethane solution was concentrated *in vacuo* again, then was diluted by 10 mL of anhydrous toluene under argon. The solution of hydroxylamine in toluene was added into a 25 mL sealed tube with 0.5 g of activated 4 Å molecular sieves and 45 mg (1.6 mmol) of paraformaldehyde. The reaction was heated at 50 °C for 2 h, then was cooled down to room temperature. The crude was concentrated *in vacuo*. The residue was purified by chromatography over 10 g of silica gel (20% ethyl acetate in hexanes) to give 64 mg (76%, d.r.  $\geq$  20:1, *E*:*Z*  $\geq$  20:1) of nitron **S-1** as a colorless oil.

Data for nitron **S-1**: IR (neat) 3584, 3401, 2940, 1669, 1588, 1487  $\text{cm}^{-1}$ ;  $^1\text{H}$  NMR ( $\text{CDCl}_3$ , 400 MHz)  $\delta$  0.13 (m, 1H,  $\text{CH}(\text{CH}_2)_2$ ), 0.35 (m, 3H,  $\text{CH}(\text{CH}_2)_2$ ), 0.48 (m, 1H,  $\text{CH}(\text{CH}_2)_2$ ), 1.56 (d,  $J = 6.4$  Hz, 3H,  $\text{CH}_3$ ), 2.44 (m, 1H,  $\text{CHCH}_3$ ), 3.52 (ABq,  $J = 11.6, 7.6$  Hz, 1H,  $\text{CH}_2\text{NO}$ ), 3.63 (ABq,  $J = 11.6, 7.6$  Hz, 1H,  $\text{CH}_2\text{NO}$ ), 5.29 (dd,  $J = 15.6, 7.6$  Hz, 1H,  $\text{CH}=\text{CHCHR}$ ), 5.51 (qd,  $J = 15.2, 6.4$  Hz, 1H,  $\text{CH}_3\text{CH}=\text{CH}$ ), 6.76 (s, 1H,  $\text{CH}=\text{NO}$ ), 7.21 (d,  $J = 8.4$  Hz, 2H,  $\text{ClC}_6\text{H}_4\text{CH}=\text{NO}$ ), 8.23 (d,  $J = 8.8$  Hz, 2H,  $\text{ClC}_6\text{H}_4\text{CH}=\text{N}$ );  $^{13}\text{C}$  NMR ( $\text{C}_6\text{D}_6$ , 100 MHz)  $\delta$  2.83 (t), 3.42 (t), 13.45 (d), 17.82 (q), 44.75 (d), 71.70 (t), 127.00 (d), 128.57 (d), 129.24 (d), 129.86 (s), 130.29 (d), 131.85 (d), 134.82 (s); LRMS  $\text{C}_{15}\text{H}_{18}\text{ClNO} + \text{H}^+$  calcd  $m/z$  264.1, found  $m/z$  264.5.

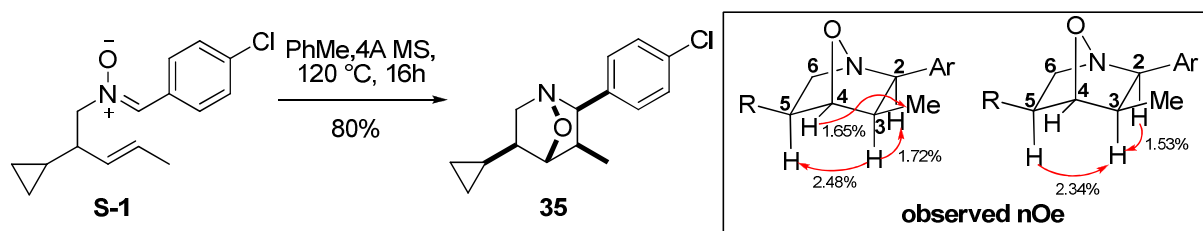

**Preparation of (±)-(2*R*,3*R*,4*S*,5*S*)-2-(4-chlorophenyl)-5-cyclopropyl-3-methyl-7-oxa-1-azabicyclo[2.2.1]heptane (35):** To a 25 mL sealed tube with 0.5 g of activated 4 Å molecular sieves was added a solution of 30 mg (0.11 mmol) of nitrone (**S-1**) in 10 mL of anhydrous toluene. The reaction was heated at 120 °C for 12 h, then was cooled down to room temperature. The crude solution was concentrated *in vacuo*. The residue was purified by chromatography over 10 g of silica gel (5% ethyl acetate in hexanes) to give 24 mg (80%, d.r. ≥ 20:1) of oxazabicyclo[2.2.1]heptane **35** as a colorless oil. No evidence were found for the presence of other isomeric product.

Data for oxazabicyclo[2.2.1]heptane **35**: IR (neat) 3585, 3084, 2980, 1596, 1493, 1454  $\text{cm}^{-1}$ ;  $^1\text{H}$  NMR ( $\text{CDCl}_3$ , 400 MHz)  $\delta$  0.05 (m, 1H,  $\text{CH}(\text{CH}_2)_2$ ), 0.15 (m, 1H,  $\text{CH}(\text{CH}_2)_2$ ), 0.44 (m, 2H,  $\text{CH}(\text{CH}_2)_2$ ), 0.46 (d,  $J = 7.2$  Hz, 3H,  $\text{CH}_3$ ), 0.76 (m, 1H,  $\text{CH}(\text{CH}_2)_2$ ), 1.32 (m, 1H, C(5)H), 2.21 (dq,  $J = 8.0, 7.2$  Hz, 1H, C(3)H $\text{CH}_3$ ), 2.91 (ABq,  $J = 11.6, 4.8$  Hz, 1H, C(6)H $_2$ NO), 3.01 (ABq,  $J = 11.2, 7.6$  Hz, 1H, C(6)H $_2$ NO), 3.82 (d,  $J = 8.0$  Hz, 1H, C(2)HNO), 4.23 (s, 1H, C(4)H), 7.18 (s, 4H, Ph-);  $^{13}\text{C}$  NMR ( $\text{CDCl}_3$ , 100 MHz)  $\delta$  3.43 (t), 4.21 (t), 14.92 (d), 16.12 (q), 45.31 (d), 51.43 (d), 63.22 (t), 73.64 (d), 89.75 (d), 127.96 (d), 129.02 (d), 132.20 (s), 138.09 (s); HRMS  $\text{C}_{15}\text{H}_{18}\text{ClNO} + \text{H}^+$  calcd  $m/z$  264.1155, found  $m/z$  264.1154.

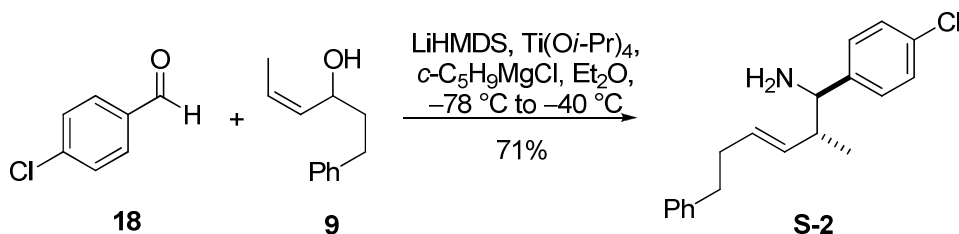

**Preparation of (±)-(1*R*,2*R*,*E*)-1-(4-chlorophenyl)-2-methyl-6-phenylhex-3-en-1-amine (S-2):** To a solution of 563 mg (4.0 mmol) of 4-chlorobenzaldehyde in 10 mL of



anhydrous ether was added 4.0 mL (4.0 mmol) of 1.0 M LiHMDS in THF at  $-10\text{ }^{\circ}\text{C}$  under argon. The reaction mixture initially appeared milky, then quickly became a clear pale yellow solution. After 20 min, a solution of 1.83 mL (1.70 g, 6.0 mmol) of  $\text{Ti}(\text{O}i\text{-Pr})_4$  in 10 mL of anhydrous ether was added via a syringe. After stirring for 5 min, the solution was cooled to  $-78\text{ }^{\circ}\text{C}$ , and 6.0 mL (12.0 mmol) of 2.0 M *c*- $\text{C}_5\text{H}_9\text{MgCl}$  in diethyl ether was added via a syringe over 2 min. The temperature of the solution was raised to  $-40\text{ }^{\circ}\text{C}$  over 30 min, then stirred at  $-40\text{ }^{\circ}\text{C}$  for an additional 1.5 h, resulting in a dark brown suspension. Next, a solution of lithium alkoxide of alcohol **9** in 4 mL of THF, prepared by deprotonation of 352 mg (2.0 mmol) of alcohol **9** at  $-78\text{ }^{\circ}\text{C}$  with 0.88 mL (2.2 mmol) of 2.5 M *n*-BuLi in hexanes followed by 10 min stirring, was added to the brown solution via cannula. The mixture was warmed to room temperature over 2 h, and then was stirred for an additional 12 h. Finally, sequential addition of 10 mL of diethyl ether and 5 mL of sat. aq.  $\text{NaHCO}_3$  was followed by vigorous stirring for 1 h. The aqueous phase was separated and extracted with 10 mL of diethyl ether (2 $\times$ ). The organic extracts were combined, dried ( $\text{MgSO}_4$ ), and concentrated *in vacuo* to afford a pale yellow oil. The residue was purified by chromatography over 50 g of silica gel ( $\text{CH}_2\text{Cl}_2$ :MeOH: $\text{NH}_4\text{OH}$  = 400:10:1) to give 425 mg (71%, d.r.  $\geq$  20:1, *E:Z*  $\geq$  20:1) of homoallylic amine **S-2** as a colorless oil.

Data for amine **S-2**: IR (neat) 3367, 3026, 2926, 1602, 1487, 1454  $\text{cm}^{-1}$ ;  $^1\text{H}$  NMR ( $\text{CDCl}_3$ , 400 MHz)  $\delta$  0.68 (d,  $J$  = 6.8 Hz, 3H,  $\text{CH}_3$ ), 1.34 (br, 2H,  $\text{NH}_2$ ), 2.16 (qd,  $J$  = 8.0, 7.2 Hz, 1H,  $\text{CHCH}_3$ ), 2.31 (m, 2H,  $\text{CH}_2$ ), 2.62 (m, 2H,  $\text{CH}_2$ ), 3.43 (d,  $J$  = 8.0 Hz, 1H,  $\text{CHNH}$ ), 5.17 (m, 1H,  $\text{CH}=\text{CHCH}(\text{CH}_3)$ ), 5.50 (td,  $J$  = 15.2, 6.8 Hz, 1H,  $\text{CH}_2\text{CH}=\text{CH}$ ), 7.10-7.22 (m, 9H, Ph-);  $^{13}\text{C}$  NMR ( $\text{CDCl}_3$ , 100 MHz)  $\delta$  17.96 (q), 34.37 (t), 35.79 (t), 45.20 (d), 60.30 (d), 125.84 (d), 128.29 (d), 128.31 (d), 128.57 (d), 128.72 (d), 131.25 (d), 132.52 (s), 133.74 (d), 141.78(s), 143.21 (s); LRMS  $\text{C}_{19}\text{H}_{22}\text{ClN} + \text{H}^+$  calcd  $m/z$  300.2, found  $m/z$  300.5.

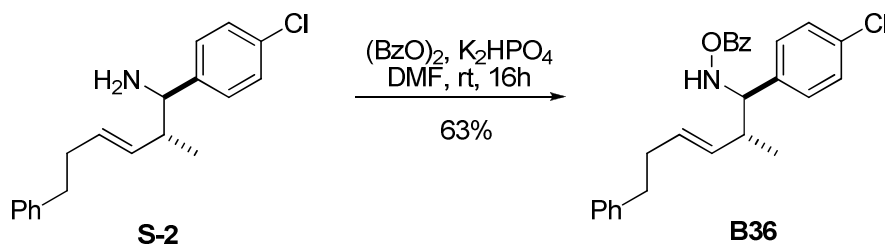

**Preparation of (±)-O-benzoyl-N-((1R,2R,E)-1-(4-chlorophenyl)-2-methyl-6-phenylhex-3-enyl)-hydroxylamine (B36):** To a suspension of 290 mg (1.2 mmol) of dibenzoyl peroxide and 261 mg (1.5 mmol) of dipotassium hydrogen phosphate in 10 mL of DMF was added a solution of 300 mg (1.0 mmol) of amine **S-2** in 2 mL of DMF under argon. The suspension was stirred at room temperature for 16 h. When the reaction was judged complete by TLC, 17 mg (0.2 mmol) of piperidine was added and the resulting solution was stirred for 10 min to remove excess dibenzoyl peroxide. (Note: Dibenzoyl peroxide and benzoylamine **B36** are inseparable via column chromatography.) The mixture was poured into 50 mL of deionized water and stirred for 30 min until the suspension turned clear. The mixture was extracted with 50 mL of ethyl acetate (2×). The organic phase was washed with 50 mL of sat. aq.  $\text{NaHCO}_3$  solution and 50 mL of brine, dried ( $\text{MgSO}_4$ ), and concentrated *in vacuo*. The residue was purified by flash chromatography with 50 g of silica gel, eluting with 2.5% ethyl acetate in hexanes to give 265 mg (63%) of benzoylamine **B36** as a water white oil.

Data for amine **B36**: IR (neat) 3230, 3026, 2929, 1718, 1601, 1490, 1451  $\text{cm}^{-1}$ ;  $^1\text{H}$  NMR ( $\text{CDCl}_3$ , 400 MHz)  $\delta$  0.72 (d,  $J = 6.8$  Hz, 3H,  $\text{CH}_3$ ), 1.49 (br, 1H, NH), 2.35 (m, 2H,  $\text{CH}_2$ ), 2.36 (m, 1H,  $\text{CHCH}_3$ ), 2.68 (t,  $J = 7.6$  Hz, 2H,  $\text{PhCH}_2$ ), 3.67 (dd,  $J = 9.2, 3.6$  Hz, 1H,  $\text{CHNH}$ ), 5.34 (m, 1H,  $\text{CH=CHCH}(\text{CH}_3)$ ), 5.63 (td,  $J = 15.2, 6.8$  Hz, 1H,  $\text{CH}_2\text{CH=CH}$ ), 7.10-7.44 (m, 9H, Ph-), 7.32, 7.74 and 7.91 (m, 5H,  $\text{C}_6\text{H}_5\text{CO}$ );  $^{13}\text{C}$  NMR ( $\text{CDCl}_3$ , 100 MHz)  $\delta$  17.98 (q), 34.32 (t), 35.74 (t), 41.15 (d), 69.41 (d), 125.82 (d), 128.32 (d), 128.38 (d), 128.46 (d), 128.53 (d), 129.25 (d), 129.41 (d), 132.49 (d), 133.25 (s), 133.26 (d), 138.56 (s), 141.73 (s), 166.69 (s); LRMS  $\text{C}_{26}\text{H}_{26}\text{ClNO}_2 + \text{H}^+$  calcd  $m/z$  420.2 found  $m/z$  420.4.

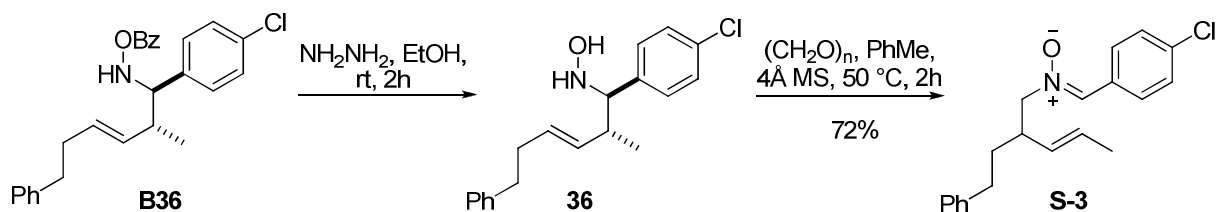

**Preparation of (3E,NZ)-N-(4-chlorobenzylidene)-2-phenethylpent-3-en-1-amine oxide (S-3):** To a solution of 91 mg (0.21 mmol) of benzoylamine **B36** in 10 mL of degassed anhydrous ethanol was added 0.2 mL of hydrazine hydrate under argon. After stirring for 4 h, the crude solution was concentrated *in vacuo*, then dissolved in 10 mL of dichloromethane under argon. The dichloromethane solution was concentrated *in vacuo* again, and then was dissolved in 10 mL of anhydrous toluene under argon. The solution of hydroxylamine in toluene was added into a 25 mL sealed tube with 0.5 g of activated 4 Å molecular sieves and 31.5 mg (1.05 mmol) of paraformaldehyde. The reaction was heated at 50 °C for 2 h, then was cooled down to room temperature. The crude was concentrated *in vacuo*. The residue was purified by chromatography over 10 g of silica gel (20% ethyl acetate in hexanes) to give 51 mg (72%, d.r.  $\geq$  20:1, *E:Z*  $\geq$  20:1) of nitron **S-3** as a colorless oil.

Data for nitron **S-3**: IR (neat) 3026, 2935, 1587, 1486, 1454  $\text{cm}^{-1}$ ;  $^1\text{H}$  NMR ( $\text{CDCl}_3$ , 400 MHz)  $\delta$  1.53 and 1.71 (m, 2H,  $\text{PhCH}_2\text{CH}_2$ ), 1.58 (dd,  $J = 6.4, 1.6$  Hz, 3H,  $\text{CH}_3$ ), 2.52 and 2.65 (m, 2H,  $\text{PhCH}_2$ ), 2.87 (m, 1H,  $\text{CHCH}_3$ ), 3.67 (ABq,  $J = 12.0, 8.0$  Hz, 1H,  $\text{CH}_2\text{NO}$ ), 3.78 (ABq,  $J = 12.0, 6.4$  Hz, 1H,  $\text{CH}_2\text{NO}$ ), 5.17 (m, 1H,  $\text{CH}=\text{CHCHR}$ ), 5.51 (qd,  $J = 15.2, 6.4$  Hz, 1H,  $\text{CH}_3\text{CH}=\text{CH}$ ), 7.09 (s, 1H,  $\text{ClC}_6\text{H}_4\text{CH}=\text{N}$ ), 7.09-7.21 (m, 5H, Ph-), 7.29 (d,  $J = 8.8$  Hz, 2H,  $\text{ClC}_6\text{H}_4\text{CH}=\text{N}$ ), 8.09 (d,  $J = 8.8$  Hz, 2H,  $\text{ClC}_6\text{H}_4\text{CH}=\text{N}$ );  $^{13}\text{C}$  NMR ( $\text{CDCl}_3$ , 100 MHz)  $\delta$  18.05 (q), 33.40 (t), 34.16 (t), 41.00 (d), 72.07 (d), 125.89 (d), 128.39 (d), 128.72 (s), 128.83 (s), 129.27 (d), 129.66 (d), 130.30 (d), 133.56 (d), 135.66 (s), 141.96 (s); LRMS  $\text{C}_{20}\text{H}_{22}\text{ClNO} + \text{H}^+$  calcd  $m/z$  328.1, found  $m/z$  328.5.

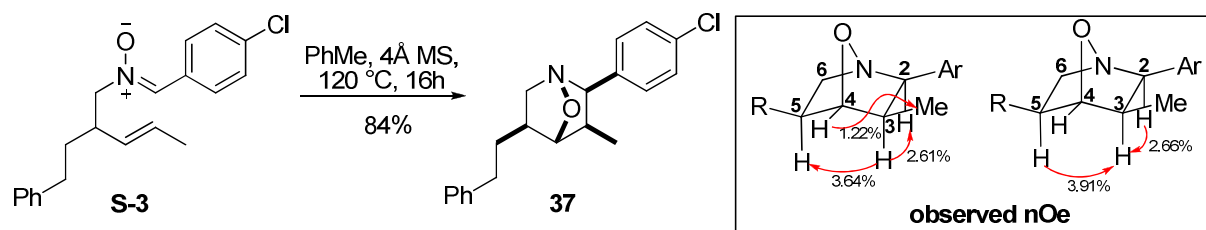

**Preparation of (±)-(2*R*,3*R*,4*S*,5*S*)-2-(4-chlorophenyl)-3-methyl-5-phenethyl-7-oxa-1-azabicyclo-[2.2.1]heptane (37):** To a 25 mL sealed tube loaded with 0.5 g of activated 4 Å molecular sieves was added a solution of 25 mg of nitron **S-3** in 10 mL of anhydrous toluene. The reaction was heated at 120 °C for 12 h, then was cooled down to room temperature. The crude was concentrated *in vacuo*. The residue was purified by chromatography over 10 g of silica gel (5 % ethyl acetate in hexanes) to give 21 mg (84%, d.r. ≥ 20:1) of oxazabicyclo[2.2.1]heptane **37** as a colorless oil. No evidence was found for the presence of other isomeric product.

Data for oxazabicyclo[2.2.1]heptane **37**: IR (neat) 3085, 2968, 2930, 1602, 1493, 1454, 1091  $\text{cm}^{-1}$ ;  $^1\text{H}$  NMR ( $\text{CDCl}_3$ , 400 MHz)  $\delta$  0.44 (d,  $J = 7.2$  Hz, 3H,  $\text{CH}_3$ ), 1.58 and 1.79 (m, 2H,  $\text{PhCH}_2\text{CH}_2$ ), 1.92 (m, 1H, C(5)H), 2.25 (dq,  $J = 8.0, 7.2$  Hz, 1H, C(3)H $\text{CH}_3$ ), 2.57 (m, 2H,  $\text{PhCH}_2$ ), 2.73 (ABq,  $J = 11.2, 5.2$  Hz, 1H, C(6)H $_2$ NO), 3.00 (ABq,  $J = 11.2, 7.6$  Hz, 1H, C(6)H $_2$ NO), 3.84 (d,  $J = 8.4$  Hz, 1H, C(2)HNO), 4.07 (s, 1H, C(4)H), 7.10-7.23 (m, 9H, Ph-);  $^{13}\text{C}$  NMR ( $\text{CDCl}_3$ , 100 MHz)  $\delta$  16.16 (q), 34.09 (t), 35.59 (t), 45.25 (d), 45.48 (d), 63.26 (t), 73.52 (d), 89.03 (d), 126.00 (d), 127.97 (d), 128.43 (d), 128.48 (d), 129.00 (d), 132.22 (s), 138.02 (s), 141.61 (s); HRMS  $\text{C}_{20}\text{H}_{22}\text{ClNO} + \text{H}^+$  calcd  $m/z$  328.1468, found  $m/z$  328.1468.

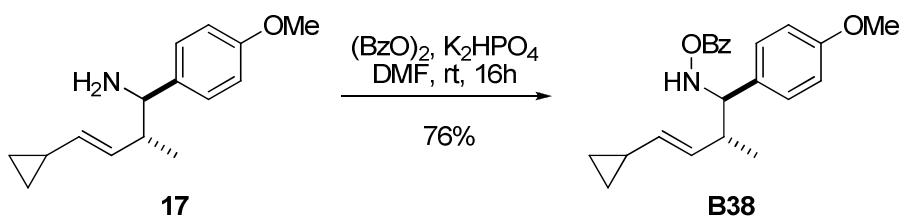

**Preparation of (±)-O-benzoyl-N-((1*R*,2*R*,*E*)-4-cyclopropyl-1-(4-methoxyphenyl)-2-methylbut-3-enyl)hydroxylamine (B38):** To a suspension of 484 mg (2.0 mmol) of dibenzoyl peroxide and 436 mg (2.5 mmol) of dipotassium hydrogen phosphate in 10

mL of DMF was added a solution of 384 mg (1.67 mmol) of amine **17** in 5 mL of DMF under argon. The suspension was stirred at room temperature for 16 h. When the reaction was judged complete by TLC, 28 mg (0.33 mmol) of piperidine was added and the resulting solution was stirred for 10 min to remove excess dibenzoyl peroxide. (Note: Dibenzoyl peroxide and benzoylamine **B38** are inseparable via column chromatography.) The mixture was poured into 50 mL of deionized water and stirred for 30 min until the suspension turned clear. The mixture was extracted with 50 mL of ethyl acetate (2×). The organic phase was washed with 50 mL of sat. aq. NaHCO<sub>3</sub> solution and 50 mL of brine, dried (MgSO<sub>4</sub>), and concentrated *in vacuo*. The residue was purified by flash chromatography with 50 g of silica gel, eluting with 2.5% ethyl acetate in hexanes to give 445 mg (76%) of benzoylamine **B38** as a colorless oil.

Data for benzoylamine **B38**: IR (neat) 3233, 3069, 2962, 1721, 1612, 1513, 1452 cm<sup>-1</sup>; <sup>1</sup>H NMR (CDCl<sub>3</sub>, 400 MHz) δ 0.34 (m, 2H, CH(CH<sub>2</sub>)<sub>2</sub>), 0.64 (m, 2H, CH(CH<sub>2</sub>)<sub>2</sub>), 0.74 (d, *J* = 6.8 Hz, 3H, CH<sub>3</sub>), 1.35 (m, 1H, CH(CH<sub>2</sub>)<sub>2</sub>), 1.60 (br, 1H, NH), 2.41 (m, 1H, CHCH<sub>3</sub>), 3.67 (dd, *J* = 9.2, 2.8 Hz, 1H, CHNH), 3.73 (s, 3H, OMe), 5.15 (dd, *J* = 15.2, 8.4 Hz, 1H, CH=CHCH(CH<sub>2</sub>)<sub>2</sub>), 5.43 (dd, *J* = 15.2, 8.8 Hz, 1H, CH<sub>3</sub>CH=CH), 6.80 and 7.22 (m, 4H, -C<sub>6</sub>H<sub>4</sub>OMe), 7.43, 7.76 and 8.01 (m, 5H, C<sub>6</sub>H<sub>5</sub>CO); <sup>13</sup>C NMR (CDCl<sub>3</sub>, 100 MHz) δ 6.69 (t), 6.73 (t), 13.62 (d), 18.28 (q), 41.18 (d), 55.22 (q), 69.75 (d), 113.66 (d), 128.38 (d), 129.10 (d), 129.28 (d), 129.68 (d), 132.04 (s), 133.11 (d), 136.48 (d), 159.02 (s), 166.81 (s); LRMS C<sub>22</sub>H<sub>25</sub>NO<sub>3</sub> + Na<sup>+</sup> calcd *m/z* 374.2, found *m/z* 374.3.

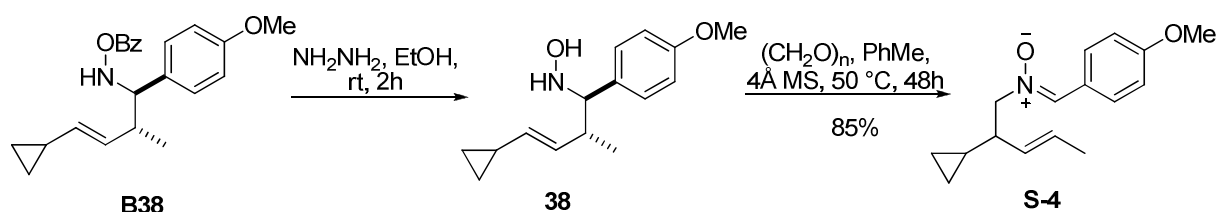

**Preparation of (3*E*,*NZ*)-2-cyclopropyl-*N*-(4-methoxybenzylidene)pent-3-en-1-amine oxide (S-4):** To a solution of 176 mg (0.50 mmol) of benzoylamine **B38** in 10 mL of degassed anhydrous ethanol was added 0.5 mL of hydrazine hydrate under argon. After stirring for 4 h, the crude solution was concentrated *in vacuo*, then dissolved in 10 mL of

dichloromethane under argon. The dichloromethane solution was concentrated *in vacuo* again, then was dissolved in 10 mL of anhydrous toluene under argon. The solution of hydroxylamine in toluene was added into a 25 mL sealed tube loaded with 0.5 g of activated 4 Å molecular sieves and 30 mg (1.0 mmol) of paraformaldehyde. The reaction was heated at 50 °C for 48 h, then was cooled down to room temperature. The crude was concentrated *in vacuo*. The residue was purified by chromatography over 10 g of silica gel (20% ethyl acetate in hexanes) to give 110 mg (85%, d.r. ≥ 20:1, *E:Z* ≥ 20:1) of nitrone **S-4** as a colorless oil.

Data for nitrone **S-4**: IR (neat) 3400, 3077, 3001, 2937, 1737, 1603, 1507, 1454 cm<sup>-1</sup>; <sup>1</sup>H NMR (CDCl<sub>3</sub>, 400 MHz) δ 0.09 and 0.14 (m, 2H, CH(CH<sub>2</sub>)<sub>2</sub>), 0.28 (m, 2H, CH(CH<sub>2</sub>)<sub>2</sub>), 0.51 (m, 1H, CH(CH<sub>2</sub>)<sub>2</sub>), 1.47 (d, *J* = 6.4 Hz, 3H, CH<sub>3</sub>), 2.11 (qd, *J* = 7.6 Hz, 1H, CHCH<sub>3</sub>), 3.65 (ABq, *J* = 12.0, 8.0 Hz, 1H, CH<sub>2</sub>NO), 3.76 (ABq, *J* = 11.6, 6.8 Hz, 1H, CH<sub>2</sub>NO), 3.68 (s, 3H, OMe), 5.19 (dd, *J* = 15.2, 7.6 Hz, 1H, CH=CHCHR), 5.40 (qd, *J* = 15.2, 6.4 Hz, 1H, CH<sub>3</sub>CH=CH), 6.76 (d, *J* = 9.2 Hz, 2H, MeOC<sub>6</sub>H<sub>4</sub>), 7.10 (s, 1H, CH=NO), 8.05 (d, *J* = 9.2 Hz, 2H, MeOC<sub>6</sub>H<sub>4</sub>-); <sup>13</sup>C NMR (C<sub>6</sub>D<sub>6</sub>, 100 MHz) δ 2.80 (t), 3.45 (t), 13.51 (d), 18.09 (q), 44.70 (d), 55.34 (q), 71.62 (t), 113.82 (d), 123.57 (s), 127.52 (d), 129.97 (d), 130.46 (d), 134.44 (d), 160.91 (s); LRMS C<sub>16</sub>H<sub>21</sub>NO<sub>2</sub> + H<sup>+</sup> calcd *m/z* 260.2, found *m/z* 260.4.

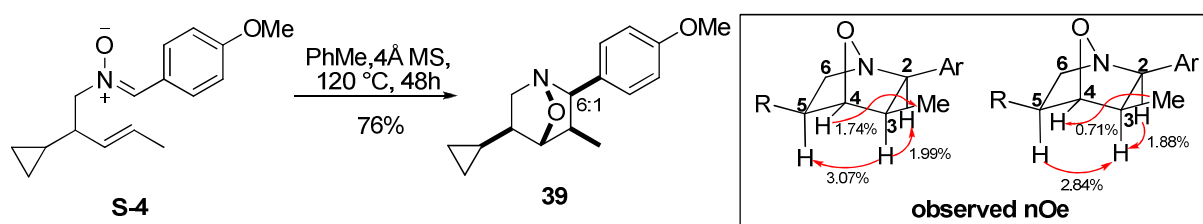

**Preparation of (±)-(2*R*,3*R*,4*S*,5*S*)-5-cyclopropyl-2-(4-methoxyphenyl)-3-methyl-7-oxa-1-azabicyclo[2.2.1]heptane (39):** To a 25 mL sealed tube loaded with 0.5 g of activated 4 Å molecular sieves was added a solution of 46 mg (0.18 mmol) of nitrone **S-4** in 10 mL of anhydrous toluene. The reaction was heated at 120 °C for 48 h, then was cooled down to room temperature. The crude solution was concentrated *in vacuo*. The

residue was purified by chromatography over 10 g of silica gel (5% ethyl acetate in hexanes) to give 35 mg (76%, d.r. = 6:1) of oxazabicyclo[2.2.1]heptane **39** as a colorless oil.

Data for oxazabicyclo[2.2.1]heptane **39**: IR (neat) 3583, 3077, 2965, 1614, 1583, 1514, 1463  $\text{cm}^{-1}$ ;  $^1\text{H}$  NMR ( $\text{CDCl}_3$ , 400 MHz)  $\delta$  0.11 (m, 1H,  $\text{CH}(\text{CH}_2)_2$ ), 0.23 (m, 1H,  $\text{CH}(\text{CH}_2)_2$ ), 0.52 (m, 2H,  $\text{CH}(\text{CH}_2)_2$ ), 0.56 (d,  $J = 7.2$  Hz, 3H,  $\text{CH}_3$ ), 0.85 (m, 1H,  $\text{CH}(\text{CH}_2)_2$ ), 1.39 (m, 1H, C(5)H), 2.28 (dq,  $J = 8.0, 7.6$  Hz, 1H, C(3)HCH<sub>3</sub>), 3.00 (ABq,  $J = 11.6, 4.8$  Hz, 1H, C(6)H<sub>2</sub>NO), 3.10 (ABq,  $J = 11.6, 8.0$  Hz, 1H, C(6)H<sub>2</sub>NO), 3.81 (s, 3H, OMe), 3.91 (d,  $J = 8.4$  Hz, 1H, C(2)HNO), 4.31 (s, 1H, C(4)H), 6.84 (d,  $J = 8.8$  Hz, 2H,  $\text{MeOC}_6\text{H}_4$ -), 7.25 (d,  $J = 8.4$  Hz, 2H,  $\text{MeOC}_6\text{H}_4$ -);  $^{13}\text{C}$  NMR ( $\text{CDCl}_3$ , 100 MHz)  $\delta$  3.42 (t), 4.20 (t), 14.96 (d), 16.14 (q), 45.51 (d), 51.45 (d), 55.21 (q), 63.31 (t), 73.82 (d), 89.73 (d), 113.20 (d), 128.66 (d), 131.78 (s), 158.17 (s); HRMS  $\text{C}_{16}\text{H}_{21}\text{NO}_2 + \text{H}^+$  calcd  $m/z$  260.1651, found  $m/z$  260.1648.

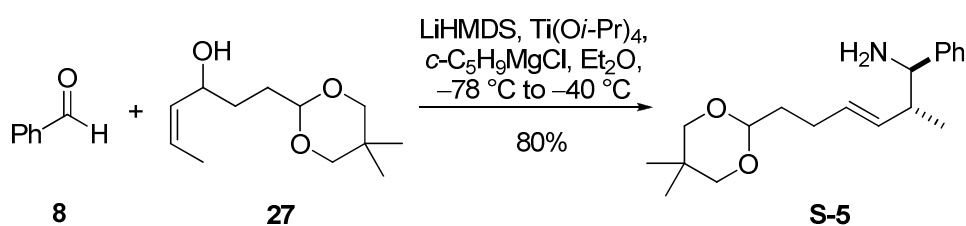

**Preparation of (±)-(1R,2R,E)-6-(5,5-dimethyl-1,3-dioxan-2-yl)-2-methyl-1-phenylhex-3-en-1-amine (S-5):** To a solution of 201 mg (1.9 mmol) of benzaldehyde in 10 mL of anhydrous ether was added 1.9 mL (1.9 mmol) of 1.0 M LiHMDS in THF at  $-10$   $^\circ\text{C}$  under argon. The reaction mixture initially appeared milky, then quickly became a clear pale yellow solution. After 20 min, a solution of 0.88 mL (0.81 g, 2.85 mmol) of  $\text{Ti}(\text{O}i\text{-Pr})_4$  in 10 mL of anhydrous ether was added via a syringe. After stirring for 5 min, the solution was cooled to  $-78$   $^\circ\text{C}$ , and 2.95 mL (5.7 mmol) of 2.0 M  $c\text{-C}_5\text{H}_9\text{MgCl}$  in diethyl ether was added via a syringe over 2 min. The temperature of the reaction was raised to  $-40$   $^\circ\text{C}$  over 30 min, then was stirred at  $-40$   $^\circ\text{C}$  for an additional 1.5 h, resulted in a dark brown suspension. Next, a solution of lithium alkoxide of alcohol **27** in 4 mL of

THF, prepared by deprotonation of 203 mg (0.95 mmol) of alcohol **27** at  $-78\text{ }^{\circ}\text{C}$  with 0.42 mL (1.05 mmol) of 2.5 M *n*-BuLi in hexanes followed by 10 min stirring, was added to the brown solution via cannula. The mixture was warmed to room temperature over 2 h, then was stirred for 12 h. Finally, sequential addition of 10 mL of diethyl ether and 5 mL of sat. aq. NaHCO<sub>3</sub> was followed by vigorous stirring for 1 h. The aqueous phase was separated and extracted with 10 mL of diethyl ether (2×). The organic extracts were combined, dried (MgSO<sub>4</sub>), and concentrated *in vacuo* to afford a pale yellow oil. The residue was purified by chromatography over 50 g of silica gel (CH<sub>2</sub>Cl<sub>2</sub>:MeOH:NH<sub>4</sub>OH = 400:10:1) to give 230 mg (80%, d.r.  $\geq$  20:1, *E:Z*  $\geq$  20:1) of homoallylic amine **S-5** as a colorless oil.

Data for amine **S-5**: IR (neat) 3379, 2953, 1603, 1493, 1470, 1454 cm<sup>-1</sup>; <sup>1</sup>H NMR (CDCl<sub>3</sub>, 400 MHz)  $\delta$  0.61 (s, 3H, CH<sub>3</sub>), 0.66 (d, *J* = 6.8 Hz, 3H, CH<sub>3</sub>), 1.08 (s, 3H, CH<sub>3</sub>), 1.43 (br, 2H, NH<sub>2</sub>), 1.63 (m, 2H, =CHCH<sub>2</sub>), 2.06 (td, *J* = 7.6, 6.8 Hz, 2H, CH<sub>2</sub>CH(OR)<sub>2</sub>), 2.19 (m, 1H, CH<sub>3</sub>CH), 3.30 and 3.49 (ABq, *J* = 10.4 Hz, 4H, (OCH<sub>2</sub>)<sub>2</sub>), 3.46 (d, *J* = 8.4 Hz, 1H, PhCH-), 4.32 (t, *J* = 5.2 Hz, 1H, CH(OR)<sub>2</sub>), 5.22 (m, 1H, CH<sub>3</sub>CH=CH-), 5.47 (td, *J* = 14.8, 6.4 Hz, 1H, CH<sub>2</sub>CH=CH), 7.12-7.21 (m, 5H, Ph-); <sup>13</sup>C NMR (CDCl<sub>3</sub>, 100 MHz)  $\delta$  18.17 (q), 21.85 (q), 23.00 (q), 27.09 (t), 30.17 (s), 34.63 (t), 45.30 (d), 61.01 (d), 77.34 (d), 101.67 (d), 126.97 (d), 127.38 (d), 128.20 (d), 131.21 (d), 133.64 (d), 144.76 (s); LRMS C<sub>19</sub>H<sub>29</sub>NO<sub>2</sub> + H<sup>+</sup> calcd *m/z* 304.2, found *m/z* 304.3.

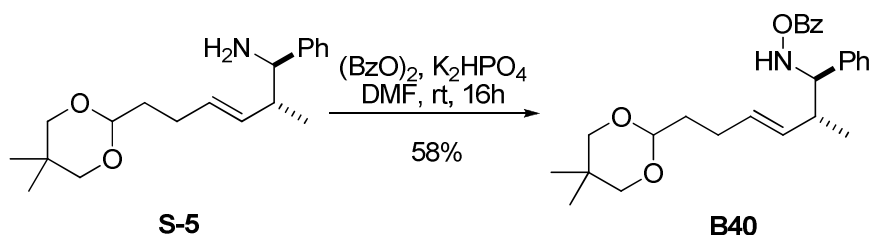

**Preparation of (±)-O-benzoyl-N-((1*R*,2*R*,*E*)-6-(5,5-dimethyl-1,3-dioxan-2-yl)-2-methyl-1-phenylhex-3-enyl)hydroxylamine (**B40**):** To a suspension of 152 mg (0.63 mmol) of dibenzoyl peroxide and 138 mg (0.80 mmol) of dipotassium hydrogen phosphate in 10 mL of DMF was added a solution of 160 mg (0.53 mmol) of amine **S-5**



in 2 mL of DMF under argon. The suspension was stirred at room temperature for 16 h. The mixture was poured into 50 mL of deionized water and stirred for 30 min until it turned clear. The mixture was extracted with 50 mL of ethyl acetate (2×). The organic phase was washed with 50 mL of sat. aq. NaHCO<sub>3</sub> solution and 50 mL of brine, dried (MgSO<sub>4</sub>), and concentrated *in vacuo*. The residue was purified by flash chromatography with 50 g of silica gel, eluting with 20% ethyl acetate in hexanes to give 130 mg (58%) of benzoylamine **B40** as a colorless oil.

Data for benzoylamine **B40**: IR (neat) 3228, 2954, 2848, 1718, 1602, 1494, 1452, 1266 cm<sup>-1</sup>; <sup>1</sup>H NMR (CDCl<sub>3</sub>, 400 MHz) δ 0.64 (s, 3H, CH<sub>3</sub>), 0.75 (d, *J* = 6.8 Hz, 3H, CH<sub>3</sub>), 1.12 (s, 3H, CH<sub>3</sub>), 1.70 (m, 2H, =CHCH<sub>2</sub>), 2.17 (td, *J* = 7.6, 6.8 Hz, 2H, CH<sub>2</sub>CH(OR)<sub>2</sub>), 2.48 (m, 1H, CH<sub>3</sub>CH), 3.38 (dd, *J* = 10.4, 6.8 Hz, 2H, (OCH<sub>2</sub>)<sub>2</sub>), 3.52 (d, *J* = 10.4 Hz, 2H, (OCH<sub>2</sub>)<sub>2</sub>), 3.72 (dd, *J* = 9.2, 3.6 Hz, 1H, PhCH-), 4.42 (t, *J* = 5.2 Hz, 1H, CH(OR)<sub>2</sub>), 5.41 (m, 1H, CH<sub>3</sub>CH=CH-), 5.62 (td, *J* = 15.2, 6.8 Hz, 1H, CH<sub>2</sub>CH=CH), 7.10-7.29 (m, 5H, Ph-), 7.43, 7.72 and 8.07 (m, 5H, C<sub>6</sub>H<sub>5</sub>CO); <sup>13</sup>C NMR (CDCl<sub>3</sub>, 100 MHz) δ 18.16 (q), 21.85 (q), 23.03 (q), 27.01 (t), 30.17 (s), 34.32 (t), 41.16 (d), 70.16 (d), 77.17 (d), 101.49 (d), 127.58 (d), 128.09 (d), 128.26 (d), 128.39 (d), 128.51 (s), 129.25 (d), 132.23 (d), 132.57 (d), 133.12 (d), 139.96 (s), 166.71 (s); LRMS C<sub>26</sub>H<sub>33</sub>NO<sub>2</sub> + H<sup>+</sup> calcd *m/z* 424.2, found *m/z* 424.2.

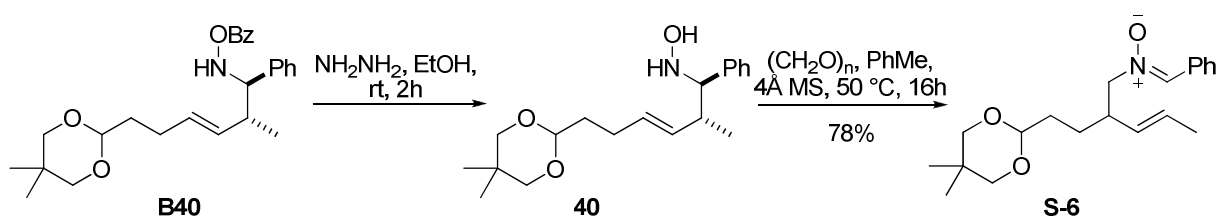

**Preparation of (±)-(3*E*,*NZ*)-*N*-benzylidene-2-(2-(5,5-dimethyl-1,3-dioxan-2-yl)ethyl)pent-3-en-1-amine oxide (S-6):** To a solution of 130 mg (0.31 mmol) of benzoylamine **B40** in 10 mL of degassed anhydrous ethanol was added 0.3 mL of hydrazine hydrate under argon. After stirring for 8 h, the crude solution was concentrated *in vacuo*, then dissolved in 10 mL of dichloromethane under argon. The dichloromethane solution was concentrated *in vacuo* again, then dissolved in 10 mL of anhydrous toluene under argon. The solution of hydroxylamine in toluene was added

into a 25 mL sealed tube with 0.5 g of activated 4 Å molecular sieves and 30 mg (1.0 mmol) of paraformaldehyde. The reaction was heated at 50 °C for 16 h, and then was cooled down to room temperature. The crude solution was concentrated *in vacuo*. The residue was purified by flash chromatography over 10 g of silica gel (20% to 50% ethyl acetate in hexanes) to give 80 mg (78%, d.r.  $\geq$  20:1, *E:Z*  $\geq$  20:1) of nitrone **S-6** as a colorless oil.

Data for nitrone **S-6**: IR (neat) 3060, 2936, 1670, 1582, 1567, 1495, 1455  $\text{cm}^{-1}$ ;  $^1\text{H}$  NMR ( $\text{CDCl}_3$ , 400 MHz)  $\delta$  0.63 (s, 3H,  $\text{CH}_3$ ), 1.10 (d,  $J = 6.8$  Hz, 3H,  $\text{CH}_3$ ), 1.53 (d,  $J = 6.4$  Hz, 3H,  $\text{CH}_3$ ), 1.31, 1.53 and 1.67 (m, 4H,  $=\text{CHCH}(\text{CH}_2)_2-$ ), 2.82 (m, 1H,  $\text{C}(2)\text{HCH}=\text{}$ ), 3.33 and 3.50 (ABq,  $J = 10.8$  Hz, 4H,  $(\text{OCH}_2)_2$ ), 3.66 (ABq,  $J = 11.6, 8.4$  Hz, 1H,  $\text{CH}_2\text{NO}$ ), 3.77 (ABq,  $J = 11.6, 6.4$  Hz, 1H,  $\text{CH}_2\text{NO}$ ), 4.34 (t,  $J = 5.6$  Hz, 1H,  $\text{CH}(\text{OR})_2$ ), 5.11 (m, 1H,  $\text{CH}_3\text{CH}=\text{CH}-$ ), 5.51 (qd,  $J = 15.2, 6.8$  Hz, 1H,  $\text{CH}_2\text{CH}=\text{CH}-$ ), 7.33 and 8.15 (m, 5H,  $\text{C}_6\text{H}_5-$ ), 8.14 (m, 1H,  $\text{CH}=\text{NO}$ );  $^{13}\text{C}$  NMR ( $\text{C}_6\text{D}_6$ , 100 MHz)  $\delta$  17.99 (q), 21.83 (q), 22.98 (q), 26.42 (t), 32.45 (t), 40.99 (d), 72.00 (t), 77.22 (t), 101.86 (d), 128.43 (d), 128.54 (d), 129.01 (d), 130.20 (d), 130.28 (d), 130.45 (d), 134.68 (s); LRMS:  $\text{C}_{20}\text{H}_{29}\text{NO}_3 + \text{H}^+$  calcd  $m/z$  332.2, found  $m/z$  332.4.

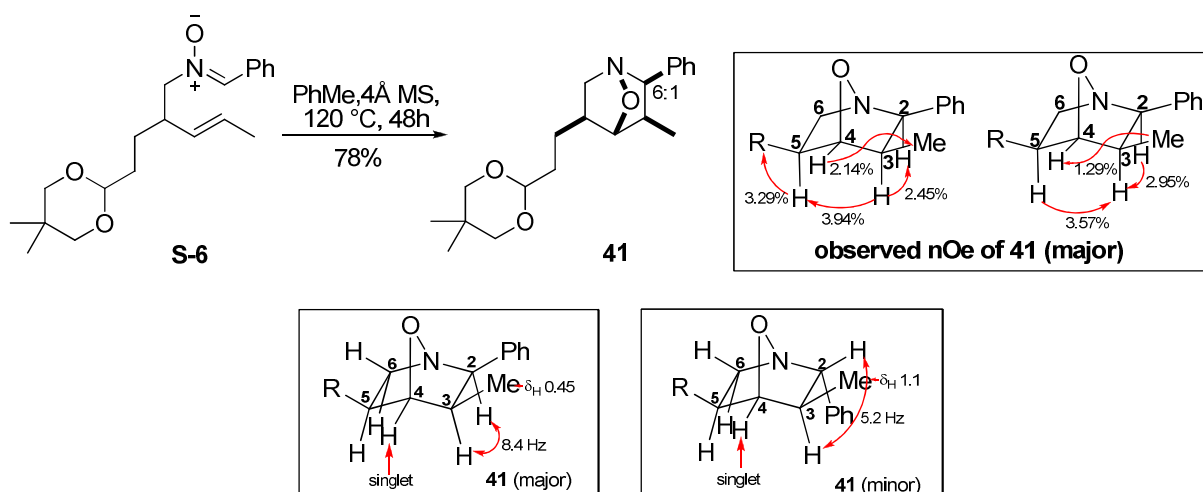

**Preparation of ( $\pm$ )-(2*R*,3*R*,4*S*,5*S*)-5-(2-(5,5-dimethyl-1,3-dioxan-2-yl)ethyl)-3-methyl-2-phenyl-7-oxa-1-azabicyclo[2.2.1]heptane (**41**):** To a 25 mL sealed tube with 0.5 g of activated 4 Å molecular sieves was added a solution of 80 mg (0.24 mmol) of nitrone **S-**

**6** in 10 mL of anhydrous toluene. The reaction was heated at 120 °C for 48 h, then was cooled down to room temperature. The crude solution was concentrated *in vacuo*. The residue was purified by chromatography over 10 g of silica gel (5% ethyl acetate in hexanes) to give 62 mg (78%, d.r. = 6:1) of an inseparable mixture of oxazabicyclo[2.2.1]heptane **41** and its diastereomer in a ratio of 6:1 as a colorless oil.

Data for the major product oxazabicyclo[2.2.1]heptane **41**: IR (neat) 3584, 2953, 2850, 1603, 1495, 1471  $\text{cm}^{-1}$ ;  $^1\text{H}$  NMR ( $\text{CDCl}_3$ , 400 MHz)  $\delta$  0.45 (d,  $J = 7.2$  Hz, 3H,  $\text{CH}_3$ ), 0.65 (s, 3H,  $\text{CH}_3$ ), 1.11 (s, 3H,  $\text{CH}_3$ ), 1.59 (m, 4H,  $(\text{CH}_2)_2$ ), 1.93 (m, 1H, C(5)H), 2.30 (qd,  $J = 8.4, 7.6$  Hz, 1H, C(3)H $\text{CH}_3$ ), 2.69 (dd,  $J = 11.6, 4.8$  Hz, 1H, C(6)H $_2$ ), 3.00 (dd,  $J = 11.6, 7.6$  Hz, 1H, C(6)H $_2$ ), 3.35 and 3.53 (ABq,  $J = 10.4$  Hz, 4H,  $(\text{OCH}_2^-)_2$ ), 3.89 (d,  $J = 8.4$  Hz, 1H, C(2)H), 4.09 (s, 1H, C(4)H), 4.36 (t,  $J = 4.8$  Hz, 1H,  $\text{CH}(\text{OR})_2$ ), 7.11-7.29 (m, 5H, Ph-);  $^{13}\text{C}$  NMR ( $\text{CDCl}_3$ , 100 MHz)  $\delta$  16.14 (q), 21.85 (q), 23.00 (q), 28.16 (t), 30.15 (s), 33.20 (t), 45.62 (d), 45.80 (d), 63.41 (t), 74.13 (d), 77.35 (t), 89.00 (d), 101.82 (d), 126.45 (d), 127.62 (d), 127.80 (d), 128.58 (d), 139.49 (s); HRMS  $\text{C}_{20}\text{H}_{29}\text{NO}_3 + \text{H}^+$  calcd  $m/z$  332.2226, found  $m/z$  332.2223.

Data for the minor product:  $^1\text{H}$  NMR ( $\text{CDCl}_3$ , 400 MHz)  $\delta$  0.64 (s, 3H,  $\text{CH}_3$ ), 1.10 (d,  $J = 7.2$  Hz, 3H,  $\text{CH}_3$ ), 1.12 (s, 3H,  $\text{CH}_3$ ), 1.53 (m, 4H,  $(\text{CH}_2)_2$ ), 1.68 (m, 1H, C(5)H), 2.04 (qd,  $J = 6.8, 5.6$  Hz, 1H, C(3)H $\text{CH}_3$ ), 2.33 (dd,  $J = 11.6, 4.8$  Hz, 1H, C(6)H $_2$ ), 2.89 (dd,  $J = 11.6, 7.6$  Hz, 1H, C(6)H $_2$ ), 3.32 and 3.51 (ABq,  $J = 10.4$  Hz, 4H,  $(\text{OCH}_2^-)_2$ ), 4.05 (d,  $J = 5.2$  Hz, 1H, C(2)H), 4.14 (s, 1H, C(4)H), 4.31 (t,  $J = 4.8$  Hz, 1H,  $\text{CH}(\text{OR})_2$ ), 7.11-7.29 (m, 5H, Ph). (Note: Since the major product and minor product were inseparable, this data was based  $^1\text{H}$  NMR and COSY of the mixture. The structure of the minor was based on coupling constants of C(2)H, C(3)H, C(4)H and C(5)H as well as chemical shifts of C(6)H $_2$  and methyl group on C(3)H).

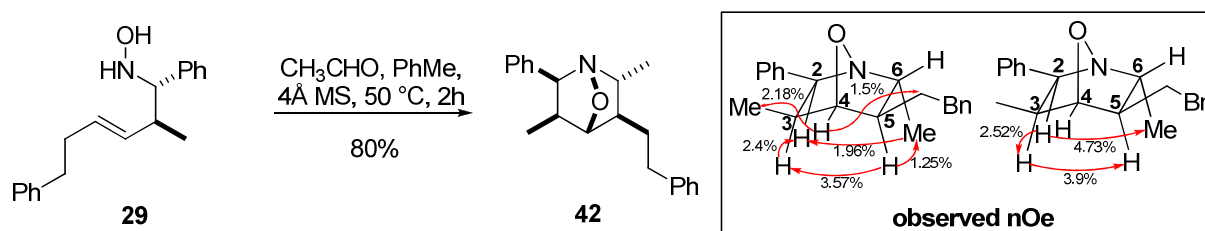

**Preparation of (±)-(2*R*,3*R*,4*S*,5*S*,6*S*)-3,6-dimethyl-5-phenethyl-2-phenyl-7-oxa-1-azabicyclo-[2.2.1]heptane (42):** To a 25 mL sealed tube with 0.5 g of activated 4 Å molecular sieves was added a solution of 79 mg (0.25 mmol) of hydroxylamine **29** in 10 mL of anhydrous toluene, followed by addition of 0.1 mL (1.8 mmol) of acetaldehyde via syringe. The reaction was heated at 120 °C for 72 h, then was cooled down to room temperature. The crude was concentrated *in vacuo*. The residue was purified by chromatography over 10 g of silica gel (5% ethyl acetate in hexanes) to give 65 mg (80%, d.r. = 4:1) of an inseparable mixture of oxazabicyclo[2.2.1]heptane **42** and its diastereomer as a colorless oil.

Data for oxazabicyclo[2.2.1]heptane **42**: IR (neat) 3583, 3077, 2965, 1614, 1583, 1514, 1463  $\text{cm}^{-1}$ ;  $^1\text{H}$  NMR ( $\text{CDCl}_3$ , 400 MHz)  $\delta$  0.45 (d,  $J = 7.2$  Hz, 3H, C(3)HCH<sub>3</sub>), 1.22 (d,  $J = 7.2$  Hz, 3H, C(6)HCH<sub>3</sub>), 1.35 (m, 1H, C(5)H), 1.64 and 1.75 (m, 2H, CH<sub>2</sub>Bn), 2.19 (qd,  $J = 8.6, 7.2$  Hz, 1H, C(3)H), 2.60 (m, 2H, PhCH<sub>2</sub>-), 3.09 (qd,  $J = 8.6, 7.2$  Hz, 1H, C(6)HCH<sub>3</sub>), 3.98 (s, 1H, C(4)H), 4.33 (d,  $J = 8.4$  Hz, 1H, C(2)H), 7.11-7.29 (m, 10H, Ph-);  $^{13}\text{C}$  NMR ( $\text{CDCl}_3$ , 100 MHz)  $\delta$  15.58 (q), 16.46 (q), 34.41 (t), 35.39 (t), 46.29 (d), 53.02 (d), 65.06 (d), 68.58 (d), 91.37 (d), 125.96 (d), 126.02 (d), 126.43 (d), 126.46 (d), 126.83 (d), 128.50 (d), 139.63 (s), 141.79 (s); HRMS  $\text{C}_{21}\text{H}_{26}\text{NO} + \text{H}^+$  calcd  $m/z$  308.2014, found  $m/z$  308.2013.

**Procedure for the preparation of nitron cyclization products listed in Table 3:**

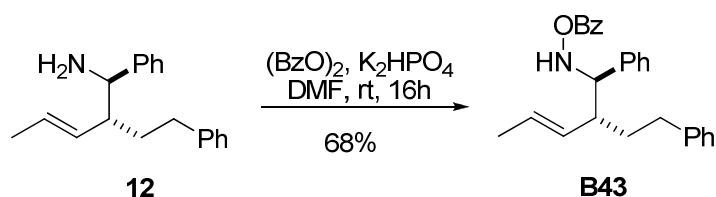

**Preparation of (±)-O-benzoyl-N-((1R,2R,E)-2-phenethyl-1-phenylpent-3-enyl)-hydroxylamine (B43):** To a suspension of 331 mg (1.4 mmol) of dibenzoyl peroxide and 298 mg (1.71 mmol) of dipotassium hydrogen phosphate in 10 mL of DMF was added a solution of 301 mg (1.14 mmol) of amine **12** in 2 mL of DMF under argon. The suspension was stirred at room temperature for 16 h. When the reaction was judged complete by TLC, 18 mg (0.23 mmol) of piperidine was added and the resulting solution was stirred for 10 min to remove excess dibenzoyl peroxide. (Note: Dibenzoyl peroxide and benzoylamine **B43** are inseparable via column chromatography.) The mixture was poured into 50 mL of deionized water and stirred for 30 min until the suspension turned clear. The mixture was extracted with 50 mL of ethyl acetate (2×). The organic phase was washed with 50 mL of sat. aq. NaHCO<sub>3</sub> solution and 50 mL of brine, dried (MgSO<sub>4</sub>), and concentrated *in vacuo*. The residue was purified by flash chromatography with 50 g of silica gel, eluting with 2.5% ethyl acetate in hexanes to give 297 mg (68%) of benzoylamine **B43** as a colorless oil.

Data for benzoylamine **B43**: IR (neat) 3226, 2919, 1719, 1602, 1585, 1452 cm<sup>-1</sup>; <sup>1</sup>H NMR (CDCl<sub>3</sub>, 400 MHz) δ 1.42 and 1.56 (m, 2H, -CH<sub>2</sub>CH<sub>2</sub>Ph), 1.58 (br, 1H, NH), 1.86 (dd, *J* = 6.4, 1.6 Hz, 3H, CH<sub>3</sub>), 2.38 and 2.66 (m, 2H, -CH<sub>2</sub>Ph), 2.46 (m, 1H, CHCH<sub>2</sub>Bn), 3.90 (dd, *J* = 9.6, 3.6 Hz, 1H, CHNH), 5.43 (m, 1H, CH<sub>3</sub>CH=CH-), 5.74 (qd, *J* = 13.2, 6.8 Hz, 1H, CH<sub>3</sub>CH=CH), 7.01-7.40 (m, 10H, Ph-), 7.52, 7.82 and 8.18 (m, 5H, C<sub>6</sub>H<sub>5</sub>CO); <sup>13</sup>C NMR (CDCl<sub>3</sub>, 100 MHz) δ 18.16 (q), 32.69 (t), 33.02 (t), 46.18 (d), 69.15 (d), 125.67 (d), 127.67 (d), 128.21 (d), 128.22 (d), 128.33 (s), 128.40 (d), 129.25 (d), 130.20 (d), 131.30 (d), 133.15 (s), 139.90 (s), 141.97 (s), 166.82 (s); LRMS C<sub>26</sub>H<sub>27</sub>NO<sub>2</sub> + H<sup>+</sup> calcd *m/z* 386.2, found *m/z* 386.4.

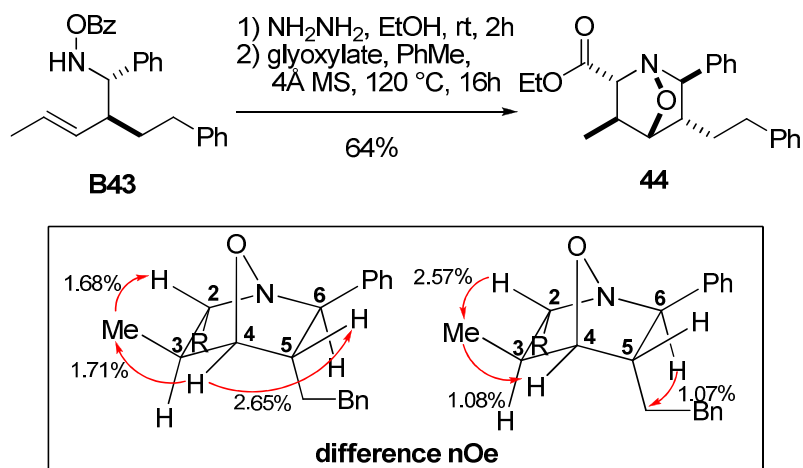

**Preparation of (±)-(2*R*,3*S*,4*S*,5*S*,6*R*)- ethyl 3-methyl-5-phenethyl-6-phenyl-7-oxa-1-azabicyclo-[2.2.1]heptane-2-carboxylate (**44**):** To a solution of 100 mg (0.26 mmol) of benzoylamine **B43** in 10 mL of degassed anhydrous ethanol was added 0.5 mL of hydrazine hydrate under argon. After stirring for 6 h, the crude solution was concentrated *in vacuo*, then dissolved in 10 mL of dichloromethane under argon. The dichloromethane solution was concentrated *in vacuo* again, and then was dissolved in 10 mL of anhydrous toluene under argon. The resulting solution of hydroxylamine in toluene was added into a 25 mL sealed tube with 0.5 g of activated 4 Å molecular sieves. A solution of 60 μL (60 mg, 0.29 mmol) of ethyl glyoxylate (50% wt in H<sub>2</sub>O) was added to the reaction mixture via a syringe. The temperature of the reaction was heated at 100 °C for 12 h, and then was cooled down to room temperature. The crude solution was concentrated *in vacuo*. The residue was purified by chromatography over 10 g of silica gel (5% ethyl acetate in hexanes) to give 61 mg (64%, d.r. ≥ 20:1) of oxazabicyclo[2.2.1]heptanes **44** as the a water white oil. No evidence was found for the presence of other isomeric product.

Data for oxazabicyclo[2.2.1]heptane **44**: IR (neat) 3436, 2931, 1732, 1455, 1031 cm<sup>-1</sup>; <sup>1</sup>H NMR (CDCl<sub>3</sub>, 400 MHz) δ 1.02 (d, *J* = 6.8 Hz, 3H, CH<sub>3</sub>), 1.22 (t, *J* = 7.2 Hz, 3H, OCH<sub>2</sub>CH<sub>3</sub>), 1.88 and 2.01 (m, 2H, PhCH<sub>2</sub>-), 2.37 (m, 1H, C(5)HCH<sub>2</sub>-), 2.42 and 2.62 (m, 2H, -CH<sub>2</sub>Bn), 2.58 (m, 1H, C(3)H), 3.56 (d, *J* = 6.0 Hz, 1H, C(6)HNO), 3.60 (d, *J* = 6.5 Hz, 1H, C(2)H), 4.16 (m, 2H, OCH<sub>2</sub>CH<sub>3</sub>), 4.23 (d, *J* = 7.2 Hz, 1H, C(4)H), 7.02-7.31 (m,

10H, Ph-);  $^{13}\text{C}$  NMR ( $\text{CDCl}_3$ , 100 MHz)  $\delta$  14.21 (q), 18.96 (q), 30.37 (t), 35.57 (t), 35.68 (d), 54.80 (d), 61.44 (t), 71.49 (d), 77.81 (d), 90.12 (d), 126.13 (d), 126.84 (d), 127.17 (d), 128.33 (d), 128.51 (d), 128.52 (d), 141.27 (s), 143.30 (s), 169.26 (s); HRMS  $\text{C}_{23}\text{H}_{27}\text{NO}_3 + \text{H}^+$  calcd  $m/z$  366.2069, found  $m/z$  366.2068.

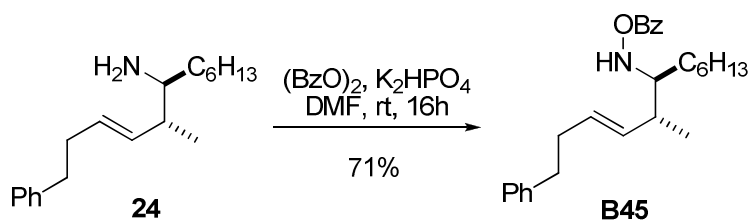

**Preparation of (±)-O-benzoyl-N-((5*R*,6*S*,*E*)-5-methyl-1-phenyldodec-3-en-6-yl)-hydroxylamine (B45):** To a suspension of 160 mg (0.66 mmol) of dibenzoyl peroxide and 144 mg (0.83 mmol) of dipotassium hydrogen phosphate in 10 mL of DMF was added a solution of 150 mg (0.55 mmol) of amine **24** in 2 mL of DMF under argon. The suspension was stirred at room temperature for 16 h, and then was poured into 50 mL of deionized water with stirring. After 30 min, the mixture was extracted with 50 mL of ethyl acetate (2×). The organic phase was washed with 50 mL of sat. aq.  $\text{NaHCO}_3$  solution and 50 mL of brine, dried ( $\text{MgSO}_4$ ), and concentrated *in vacuo*. The residue was purified by flash chromatography with 50 g of silica gel, eluting with 2.5% ethyl acetate in hexanes to give 152 mg (71%) of benzyolamine **B45** as a colorless oil.

Data for amine **B45**: IR (neat) 3229, 3028, 2919, 1720, 1496, 1452  $\text{cm}^{-1}$ ;  $^1\text{H}$  NMR ( $\text{CDCl}_3$ , 400 MHz)  $\delta$  0.81 (t,  $J = 6.8$  Hz, 3H,  $\text{CH}_3(\text{CH}_2)_5$ ), 0.99 (d,  $J = 6.8$  Hz, 3H,  $\text{CH}_3$ ), 1.22 and 1.37 (m, 10 H,  $\text{CH}_3(\text{CH}_2)_5$ ), 1.50 (br, 2H, NH), 2.26 (td,  $J = 7.2, 6.8$  Hz, 2H,  $\text{BnCH}_2$ ), 2.35 (qd,  $J = 7.2$  Hz, 1H,  $\text{CHCH}_3$ ), 2.63 (t,  $J = 7.2$  Hz, 2H,  $\text{PhCH}_2$ ), 2.80 (m, 1H,  $\text{C}_6\text{H}_{13}\text{CH}$ ), 5.33 (dd,  $J = 15.2, 7.2$  Hz, 1H,  $-\text{CH}_2\text{CH}=\text{CH}-$ ), 5.43 (td,  $J = 15.2, 6.8$  Hz, 1H,  $-\text{CH}_2\text{CH}=\text{CH}$ ), 7.09-7.40 (m, 5H, Ph-), 7.49, 7.79 and 7.92 (m, 5H,  $\text{C}_6\text{H}_5\text{CO}$ );  $^{13}\text{C}$  NMR ( $\text{CDCl}_3$ , 100 MHz)  $\delta$  14.09 (q), 16.67 (q), 22.63 (t), 26.09 (t), 29.03 (t), 29.52 (t), 31.75 (t), 34.41 (t), 35.90 (t), 38.52 (d), 65.18 (d), 125.73 (d), 128.24 (d), 128.48 (d), 128.51 (d), 129.26 (d), 130.85 (d), 132.78 (d), 133.15 (d), 141.91 (s), 167.0 (s); LRMS  $\text{C}_{26}\text{H}_{35}\text{NO}_2 + \text{H}^+$  calcd  $m/z$  394.3, found  $m/z$  394.5.

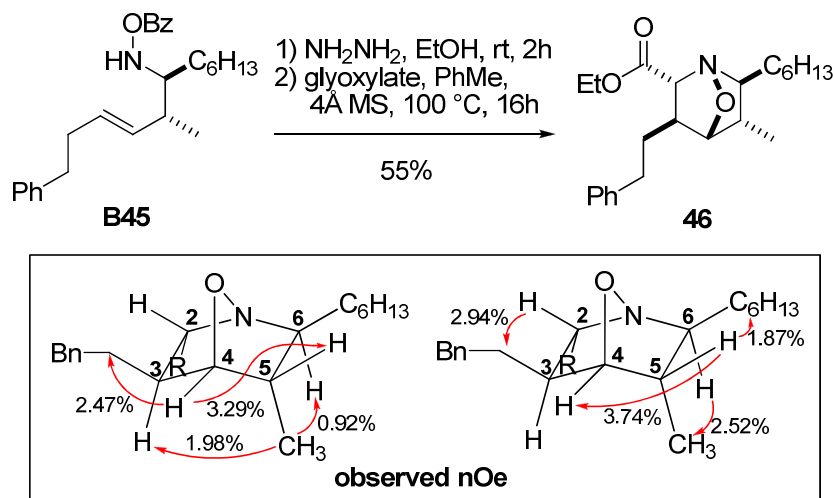

**Preparation of (±)-(2R,3S,4R,5S,6S)-ethyl 6-hexyl-5-methyl-3-phenethyl-7-oxa-1-azabicyclo-[2.2.1]heptane-2-carboxylate (46):** To a solution of 67 mg (0.17 mmol) of benzoylamine **B45** in 10 mL of degassed anhydrous ethanol was added 0.5 mL of hydrazine hydrate under argon. After stirring for 4 h, the crude solution was concentrated *in vacuo*, then dissolved in 10 mL of dichloromethane under argon. The dichloromethane solution was concentrated *in vacuo* again, and then was dissolved in 10 mL of anhydrous toluene under argon. The prepared solution of hydroxylamine in toluene was added into a 25 mL sealed tube with 0.5 g of activated 4 Å molecular sieves. A solution of 36 μL (36 mg, 0.18 mmol) of ethyl glyoxylate (50% wt in H<sub>2</sub>O) was added to the reaction mixture via a syringe. The reaction was heated at 100 °C for 2 h, and then was cooled down to room temperature. The crude was concentrated *in vacuo*. The residue was purified by chromatography over 10 g of silica gel (10% ethyl acetate in hexanes) to give 35 mg (55%, d.r. ≥ 20:1) of oxazabicyclo[2.2.1]heptanes **46** as a water white oil. No evidence was found for the presence of other isomeric product.

Data for oxazabicyclo[2.2.1]heptane **46**: IR (neat) 3438, 3063, 2957, 2928, 1733, 1496, 1455, 1207 cm<sup>-1</sup>; <sup>1</sup>H NMR (CDCl<sub>3</sub>, 400 MHz) δ 0.82 (t, *J* = 7.2 Hz, 3H, CH<sub>3</sub>), 0.97 (d, *J* = 7.2 Hz, 3H, CH<sub>3</sub>), 1.21 (m, 10H, (CH<sub>2</sub>)<sub>5</sub>), 1.68 and 1.78 (m, 2H, BnCH<sub>2</sub>-), 1.90 (m, 1H, C(5)HCH<sub>3</sub>), 2.23 (td, *J* = 8.4, 5.2 Hz, 1H, C(6)HNO), 2.50 (m, 1H, C(3)H), 2.54 (m, 2H, -CH<sub>2</sub>Ph), 3.62 (d, *J* = 5.2 Hz, 1H, C(2)H), 4.15 (m, 2H, OCH<sub>2</sub>CH<sub>3</sub>), 4.26 (d, *J* = 4.8 Hz, 1H, C(4)H), 7.10-7.22 (m, 5H, Ph-); <sup>13</sup>C NMR (CDCl<sub>3</sub>, 100 MHz) δ 12.39 (q), 14.09 (q),



14.12 (q), 22.63 (t), 26.97 (t), 29.23 (t), 31.82 (t), 34.18 (t), 35.30 (t), 35.93 (t), 40.31 (d), 45.52 (d), 61.32 (t), 70.02 (d), 76.51 (d), 89.75 (d), 125.98 (d), 128.36 (d), 128.42 (d), 141.51 (s), 169.12 (s); HRMS  $C_{23}H_{35}NO_3 + H^+$  calcd  $m/z$  374.2695, found  $m/z$  374.2692.

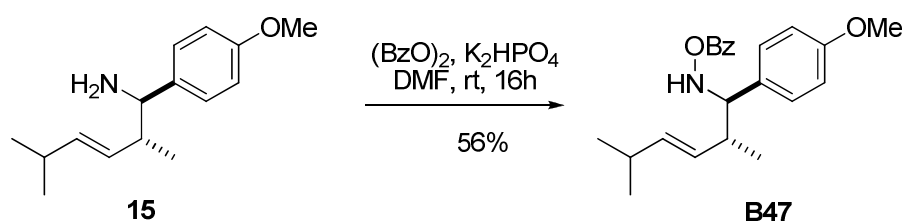

**Preparation of (±)-O-benzoyl-N-((1*R*,2*R*,*E*)-4-cyclopropyl-1-(4-methoxyphenyl)-2-**

**methylbut-3-enyl)hydroxylamine (**B47**):** To a suspension of 145 mg (0.60 mmol) of dibenzoyl peroxide and 131 mg (0.75 mmol) of dipotassium hydrogen phosphate in 10 mL of DMF was added a solution of 120 mg (0.51 mmol) of amine **15** in 2 mL of DMF under argon. The suspension was stirred at room temperature for 16 h, then was poured into 50 mL of deionized water and stirred for 30 min until it turned clear. The reaction mixture was extracted with 50 mL of ethyl acetate (2×). The organic phase was washed with 50 mL of sat. aq. NaHCO<sub>3</sub> solution and 50 mL of brine, dried (MgSO<sub>4</sub>), and concentrated *in vacuo*. The residue was purified by flash chromatography with 50 g of silica gel, eluting with 5% ethyl acetate in hexanes to give 102 mg (56%) of benzoylamine **B47** as a colorless oil.

Data for benzoylamine **B47**: IR (neat) 3232, 2959, 2869, 1721, 1612, 1512, 1453 cm<sup>-1</sup>; <sup>1</sup>H NMR (CDCl<sub>3</sub>, 400 MHz) δ 0.74 (d, *J* = 6.8 Hz, 3H, CH<sub>3</sub>), 0.96 (d, *J* = 6.8 Hz, 3H, CH(CH<sub>3</sub>)<sub>2</sub>), 0.99 (d, *J* = 6.8 Hz, 3H, CH(CH<sub>3</sub>)<sub>2</sub>), 1.50 (br, 1H, NH), 2.26 (m, 1H, CH(CH<sub>3</sub>)<sub>2</sub>), 2.42 (m, 1H, CHCH<sub>3</sub>), 3.65 (dd, *J* = 9.2, 3.6 Hz, 1H, CHNH), 3.75 (s, 3H, OMe), 5.29 (dd, *J* = 15.2, 8.8 Hz, 1H, -CH=CHCHCH<sub>3</sub>), 5.58 (dd, *J* = 15.2, 6.4 Hz, 1H, (CH<sub>3</sub>)<sub>2</sub>CHCH=CH), 6.81 and 7.21 (m, 4H, -C<sub>6</sub>H<sub>4</sub>OMe), 7.44, 7.75 and 8.12 (m, 5H, C<sub>6</sub>H<sub>5</sub>CO); <sup>13</sup>C NMR (CDCl<sub>3</sub>, 100 MHz) δ 18.18 (q), 22.52 (q), 22.57 (q), 31.16 (d), 41.20 (d), 55.23 (q), 69.67 (d), 113.64 (d), 128.38 (d), 128.59 (s), 129.10 (d), 129.12 (d), 129.27 (d), 132.15 (s), 133.10 (d), 140.31 (d), 159.00 (s), 166.83 (s); LRMS  $C_{22}H_{26}NO_3 + H^+$  calcd  $m/z$  352.2, found  $m/z$  352.4.

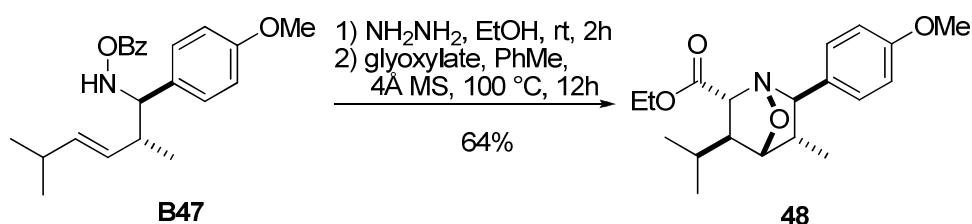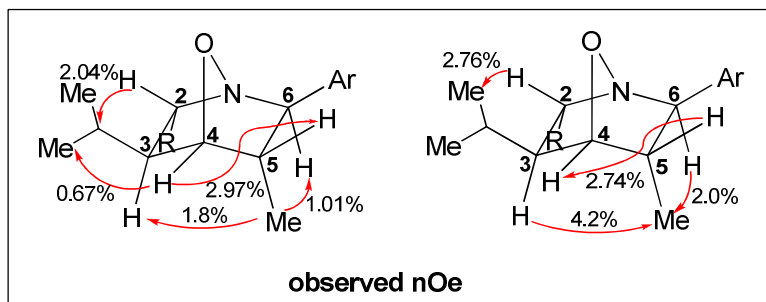

**Preparation of (±)-(2*R*,3*S*,4*R*,5*S*,6*R*)-ethyl-3-isopropyl-6-(4-methoxyphenyl)-5-methyl-7-oxa-1-azabicyclo[2.2.1]heptane-2-carboxylate (**48**):** To a solution of 60 mg (0.17 mmol) of benzoylamine **B47** in 10 mL of degassed anhydrous ethanol was added 0.5 mL of hydrazine hydrate under argon. After stirring for 4 h, the crude solution was concentrated *in vacuo*, then dissolved in 10 mL of dichloromethane under argon. The dichloromethane solution was concentrated *in vacuo* again, and then was dissolved in 10 mL of anhydrous toluene under argon. The resulting solution of hydroxylamine in toluene was added into a 25 mL sealed tube with 0.5 g of activated 4 Å molecular sieves. A solution of 40 μL (40 mg, 0.20 mmol) of ethyl glyoxylate (50% wt in H<sub>2</sub>O) was added to the reaction mixture via a syringe. The reaction was heated at 100 °C for 12 h, and then was cooled down to room temperature. The crude was concentrated *in vacuo*. The residue was purified by chromatography over 10 g of silica gel (5% ethyl acetate in hexanes) to give 36 mg (64%, d.r. ≥ 20:1) of oxazabicyclo[2.2.1]heptanes **48** as a water white oil. No evidence was found for the presence of other isomeric product.

Data for oxazabicyclo[2.2.1]heptane **48**: IR (neat) 3435, 2961, 1732, 1612, 1585, 1464 cm<sup>-1</sup>; <sup>1</sup>H NMR (CDCl<sub>3</sub>, 400 MHz) δ 0.92 (d, *J* = 6.8 Hz, 3H, CH<sub>3</sub>), 1.02 (d, *J* = 6.4 Hz, 3H, CH<sub>3</sub>), 1.23 (d, *J* = 7.2 Hz, 3H, CH<sub>3</sub>), 1.30 (t, *J* = 7.2 Hz, 3H, OCH<sub>2</sub>CH<sub>3</sub>), 1.71 (m, 1H, CH(CH<sub>3</sub>)<sub>2</sub>), 2.41 (dd, *J* = 8.8, 6.0 Hz, 1H, C(3)H<sub>*i*</sub>-Pr), 2.49 (m, 1H, CH<sub>3</sub>C(5)H-), 3.48 (d,

$J = 6.4$  Hz, 1H, C(6)H), 3.80 (s, 3H, OMe), 3.87 (d,  $J = 5.6$  Hz, 1H, C(2)HCO<sub>2</sub>Et), 4.25 (m, 2H, OCH<sub>2</sub>CH<sub>3</sub>), 4.65 (d,  $J = 4.4$  Hz, 1H, C(4)H), 6.86 (dd,  $J = 6.8, 2.0$  Hz, 2H, C<sub>6</sub>H<sub>4</sub>OMe), 7.31 (dd,  $J = 6.8, 2.0$  Hz, 2H, C<sub>6</sub>H<sub>4</sub>OMe); <sup>13</sup>C NMR (CDCl<sub>3</sub>, 100 MHz)  $\delta$  12.19 (q), 14.16 (q), 19.91 (q), 21.26 (d), 30.19 (d), 47.71 (d), 54.30 (q), 61.47 (t), 71.98 (d), 74.70 (d), 88.35 (d), 113.6 (d), 127.66 (d), 135.42 (s), 158.70 (s), 169.49 (s); HRMS C<sub>19</sub>H<sub>27</sub>NO<sub>4</sub> + H<sup>+</sup> calcd  $m/z$  334.2018, found  $m/z$  334.2017.

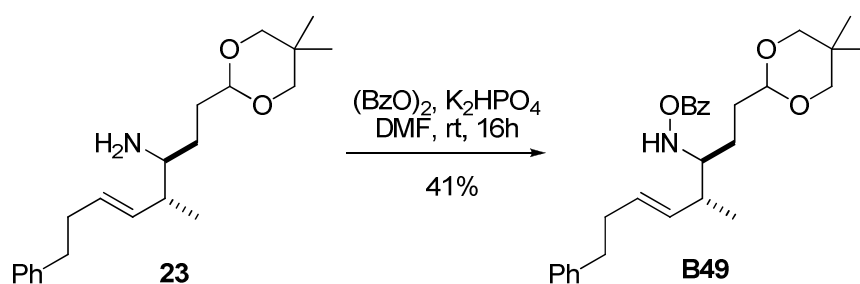

**Preparation of (±)-O-benzoyl-N-((3S,4R,E)-8-(5,5-dimethyl-1,3-dioxan-2-yl)-2,4-dimethyloct-5-en-3-yl)hydroxylamine (B49):** To a suspension of 324 mg (1.34 mmol) of dibenzoyl peroxide and 287 mg (1.65 mmol) of dipotassium hydrogen phosphate in 10 mL of DMF was added a solution of 370 mg (1.1 mmol) of amine **23** (contaminated by 64 mg of **S-7**) in 2 mL of DMF under argon. The suspension was stirred at room temperature for 16 h before pouring into 50 mL of deionized water with stirring. After 30 min, the mixture was extracted with 50 mL of ethyl acetate (2×). The organic phase was washed with 50 mL of sat. aq. NaHCO<sub>3</sub> solution and 50 mL of brine, dried (MgSO<sub>4</sub>), and concentrated *in vacuo*. The residue was purified by flash chromatography with 50 g of silica gel, eluting with 10% ethyl acetate in hexanes to give 190 mg (41%) of benzoylamine **B49** as a colorless oil (contaminated by inseparable benzoylamine DY-3-38A as noted on <sup>1</sup>H NMR spectrum).

Data for benzoylamine **B49**: IR (neat) 3234, 2956, 1721, 1602, 1495, 1452 cm<sup>-1</sup>; <sup>1</sup>H NMR (CDCl<sub>3</sub>, 400 MHz)  $\delta$  0.65 (s, 3H, CH<sub>3</sub>), 0.99 (d,  $J = 6.8$  Hz, 3H, CHCH<sub>3</sub>), 1.11 (s, 3H, CH<sub>3</sub>), 1.74 (m, 4H, (CH<sub>2</sub>)<sub>2</sub>), 2.25 (td,  $J = 8.0, 7.2$  Hz, 2H, BnCH<sub>2</sub>), 2.30 (m, 1H, CHCH<sub>3</sub>), 2.60 (t,  $J = 7.2$  Hz, 2H, PhCH<sub>2</sub>), 2.81 (m, 1H, CHNH<sub>2</sub>), 3.33 and 3.50 (ABq,  $J = 10.4$  Hz, 4H, OCH<sub>2</sub>), 4.38 (t,  $J = 4.8$  Hz, 1H, CH(OR)<sub>2</sub>), 5.31 (m, 1H, -CH<sub>2</sub>CH=CH), 5.45

(td,  $J = 13.2, 6.8$  Hz, 1H,  $-\text{CH}_2\text{CH}=\text{CH}$ ), 7.10-7.26 (m, 5H, Ph-), 7.50, 7.82 and 7.95 (m, 5H,  $\text{C}_6\text{H}_5\text{CO}$ );  $^{13}\text{C}$  NMR ( $\text{CDCl}_3$ , 100 MHz)  $\delta$  16.87 (q), 21.86 (q), 23.03 (q), 23.45 (t), 30.13 (s), 31.26 (t), 34.42 (t), 35.88 (t), 38.67 (d), 64.85 (d), 77.20 (t), 102.05 (d), 125.73 (d), 128.24 (d), 128.48 (d), 18.78 (s), 129.29 (d), 129.32 (d), 131.11 (d), 132.66 (d), 133.10 (d), 141.93 (s), 166.44 (s); LRMS  $\text{C}_{28}\text{H}_{27}\text{NO}_2 + \text{H}^+$  calcd  $m/z$  452.3, found  $m/z$  452.6.

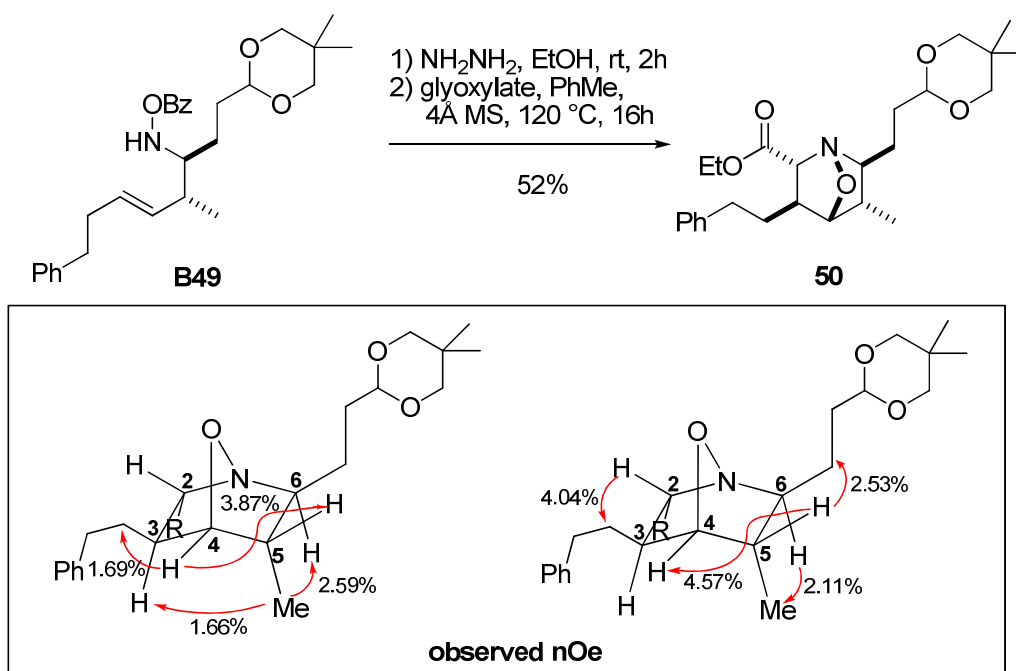

**Preparation of (±)-(2R,3S,4R,5S,6S)-ethyl-6-(2-(5,5-dimethyl-1,3-dioxan-2-yl)ethyl)-5-methyl-3-phenethyl-7-oxa-1-azabicyclo[2.2.1]heptane-2-carboxylate (50):** To a solution of 60 mg (0.14 mmol) of benzoylamine **B49** in 10 mL of degassed anhydrous ethanol was added 0.5 mL of hydrazine hydrate under argon. After stirring for 4 h, the crude solution was concentrated *in vacuo*, then dissolved in 10 mL of dichloromethane under argon. The dichloromethane solution was concentrated *in vacuo* again, and then was dissolved in 10 mL of anhydrous toluene under argon. The prepared solution of hydroxylamine in toluene was added into a 25 mL sealed tube with 0.5 g of activated 4 Å molecular sieves. A solution of 40  $\mu\text{L}$  (40 mg, 0.20 mmol) of ethyl glyoxylate (50% wt in  $\text{H}_2\text{O}$ ) was added to the reaction mixture via a syringe. The reaction was heated at

120 °C for 16 h, then was cooled down to room temperature. The crude was concentrated *in vacuo*. The residue was purified by chromatography over 10 g of silica gel (5% ethyl acetate in hexanes) to give 30 mg (52%, d.r.  $\geq$  20:1) of oxazabicyclo[2.2.1]heptanes **50** as the a water white oil. No evidence was found for the presence of other isomeric product.

Data for oxazabicyclo[2.2.1]heptane **50**: IR (neat) 2955, 2850, 1732, 1603, 1496, 1455  $\text{cm}^{-1}$ ;  $^1\text{H}$  NMR ( $\text{CDCl}_3$ , 400 MHz)  $\delta$  0.63 (s, 3H,  $\text{CH}_3$ ), 0.96 (d,  $J = 7.2$  Hz, 3H,  $\text{C}(5)\text{HCH}_3$ ), 1.10 (s, 3H,  $\text{CH}_3$ ), 1.22 (t,  $J = 7.2$  Hz, 3H,  $\text{OCH}_2\text{CH}_3$ ), 1.56 and 1.74 (m, 4H,  $(\text{CH}_2)_2$ ), 1.75 (m, 2H,  $\text{BnCH}_2$ ), 1.92 (qd,  $J = 7.2, 5.2$  Hz, 1H,  $\text{C}(5)\text{H}$ ), 2.28 (td,  $J = 8.0, 5.2$  Hz, 1H,  $\text{C}(6)\text{H}$ ), 2.50 (m, 1H,  $\text{C}(3)\text{H}$ ), 2.56 (m, 2H,  $\text{PhCH}_2$ ), 3.32 and 3.51 (ABq,  $J = 11.2$  Hz, 4H,  $-\text{OCH}_2$ ), 3.61 (d,  $J = 5.6$  Hz, 1H,  $\text{C}(2)\text{H}$ ), 4.14 (m, 2H,  $\text{OCH}_2\text{CH}_3$ ), 4.26 (d,  $J = 4.8$  Hz, 1H,  $\text{C}(4)\text{H}$ ), 4.34 (t,  $J = 4.8$  Hz, 1H,  $\text{CH}(\text{OR})_2$ );  $^{13}\text{C}$  NMR ( $\text{CDCl}_3$ , 100 MHz)  $\delta$  12.27 (q), 14.14 (q), 21.84 (q), 23.00 (q), 30.01 (t), 30.12 (s), 32.10 (t), 34.16 (t), 35.28 (t), 40.35 (d), 45.51 (d), 61.35 (t), 69.75 (d), 76.40 (d), 77.18 (t), 89.76 (d), 102.09 (d), 125.97 (d), 128.36 (d), 128.41 (d), 141.51 (s), 169.08 (s); HRMS  $\text{C}_{25}\text{H}_{37}\text{NO}_5 + \text{H}^+$  calcd  $m/z$  432.2750, found  $m/z$  432.2746.

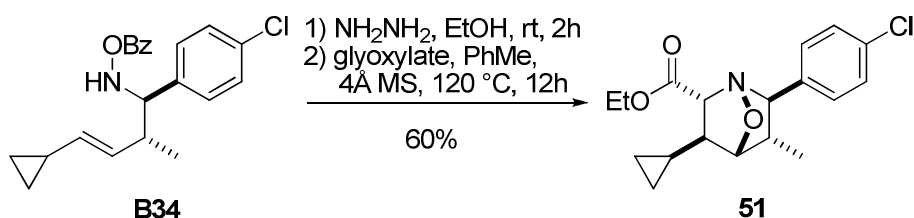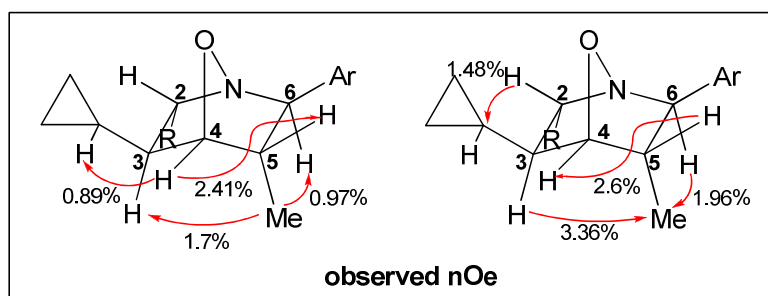

**Preparation of ( $\pm$ )-(2*R*,3*S*,4*R*,5*S*,6*R*)-ethyl-6-(4-chlorophenyl)-3-cyclopropyl-5-methyl-7-oxa-1-azabicyclo[2.2.1]heptane-2-carboxylate (**51**):** To a solution of 60 mg (0.17 mmol) of benzoylamine **B34** in 10 mL of degassed anhydrous ethanol was added

0.25 mL of hydrazine hydrate under argon. After stirring for 4 h, the crude solution was concentrated *in vacuo*, then dissolved in 10 mL of dichloromethane under argon. The dichloromethane solution was concentrated *in vacuo* again, and then was dissolved in 10 mL of anhydrous toluene under argon. The prepared solution of hydroxylamine in toluene was added into a 25 mL sealed tube with 0.5 g of activated 4 Å molecular sieves. A solution of 50  $\mu$ L (50 mg, 0.24 mmol) of ethyl glyoxylate (50% wt in H<sub>2</sub>O) was added to the reaction mixture via a syringe. The reaction was heated at 120 °C for 12 h, then cooled down to room temperature. The crude was concentrated *in vacuo*. The residue was purified by chromatography over 10 g of silica gel (10% ethyl acetate in hexanes) to give 32 mg (60%, d.r.  $\geq$  20:1) of oxazabicyclo[2.2.1]heptanes **51** as a water white oil. No evidence was found for the presence of other isomeric product.

Data for oxazabicyclo[2.2.1]heptane **51**: IR (neat) 3435, 3080, 2966, 1645, 1738, 1597, 1493, 1463, 1455  $\text{cm}^{-1}$ ; <sup>1</sup>H NMR (CDCl<sub>3</sub>, 400 MHz)  $\delta$  0.17 (m, 1H, CH(CH<sub>2</sub>)<sub>2</sub>), 0.25 (m, 1H, CH(CH<sub>2</sub>)<sub>2</sub>), 0.48 (m, 2H, CH(CH<sub>2</sub>)<sub>2</sub>), 0.88 (m, 1H, CH(CH<sub>2</sub>)<sub>2</sub>), 1.10 (d, *J* = 7.2 Hz, 3H, CH<sub>3</sub>), 1.21 (t, *J* = 7.2 Hz, 3H, OCH<sub>2</sub>CH<sub>3</sub>), 1.89 (dd, *J* = 9.6, 5.6 Hz, 1H, C(3)H), 2.34 (m, 1H, C(5)HCH<sub>3</sub>), 3.39 (d, *J* = 6.0 Hz, 1H, C(6)HNO), 3.95 (d, *J* = 4.2 Hz, 1H, C(2)H), 4.15 (m, 2H, OCH<sub>2</sub>CH<sub>3</sub>), 4.58 (d, *J* = 4.8 Hz, 1H, C(4)H), 7.22 (m, 4H, Ph-); <sup>13</sup>C NMR (CDCl<sub>3</sub>, 100 MHz)  $\delta$  3.49 (t), 4.59 (t), 12.43 (d), 14.17 (q), 14.67 (q), 46.43 (d), 48.94 (d), 61.52 (t), 71.74 (d), 76.63 (d), 90.72 (d), 127.81 (d), 128.52 (d), 132.81 (s), 141.64 (s), 169.22 (s); HRMS C<sub>18</sub>H<sub>22</sub>CINO<sub>3</sub> + H<sup>+</sup> calcd *m/z* 336.1366, found *m/z* 336.1366.

**Procedure for the preparation of molecules listed in Figure 6:**

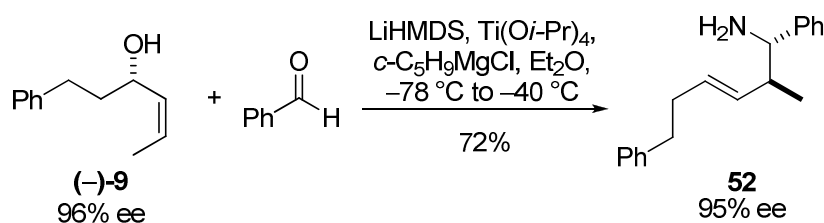

**Preparation of (1*S*,2*S*,*E*)-2-methyl-1,6-diphenylhex-3-en-1-amine (**52**):** To a solution of 424 mg (4.0 mmol) of benzaldehyde in 10 mL of anhydrous ether was added 4.0 mL

(4.0 mmol) of 1.0 M LiHMDS in THF at  $-10\text{ }^{\circ}\text{C}$  under argon. The reaction mixture initially appeared milky, then quickly became a clear pale yellow solution. After 20 min, a solution of 1.83 mL (1.70 g, 6.0 mmol) of  $\text{Ti}(\text{O}i\text{-Pr})_4$  in 10 mL of anhydrous ether was added via a syringe. After stirring for 5 min, the solution was cooled to  $-78\text{ }^{\circ}\text{C}$ , and 6.0 mL (12.0 mmol) of 2.0 M  $c\text{-C}_5\text{H}_9\text{MgCl}$  in diethyl ether was added via a syringe over 2 min. The temperature of the solution was raised to  $-40\text{ }^{\circ}\text{C}$  over 30 min, then the reaction was stirred at  $-40\text{ }^{\circ}\text{C}$  for an additional 1.5 h, resulted in a dark brown suspension. Next, a solution of lithium alkoxide of alcohol (**-**)-**9** in 4 mL of THF, prepared by deprotonation of 352 mg (2.0 mmol, 96% ee by Mosher's ester) of alcohol (**-**)-**9** at  $-78\text{ }^{\circ}\text{C}$  with 0.88 mL (2.2 mmol) of 2.5 M  $n\text{-BuLi}$  in hexanes followed by 10 min stirring, was added to the brown solution via cannula. The mixture was warmed to room temperature over 2 h, then was stirred for 12 h. Finally, sequential addition of 10 mL of diethyl ether and 5 mL of saturated aqueous  $\text{NaHCO}_3$  was followed by vigorous stirring for 1 h. The aqueous phase was separated and extracted with 10 mL of diethyl ether (2 $\times$ ). The organic extracts were combined, dried ( $\text{MgSO}_4$ ), and concentrated *in vacuo* to afford a pale yellow oil. The residue was purified by chromatography over 50 g of silica gel ( $\text{CH}_2\text{Cl}_2\text{:MeOH:NH}_4\text{OH} = 400\text{:}10\text{:}1$ ) to give 382 mg (72%, d.r.  $\geq 20\text{:}1$ ,  $E\text{:}Z \geq 20\text{:}1$ , 95% ee by Mosher's amide,) of homoallylic amine **52** as a colorless oil.

Data for amine **52**: IR (neat) 3584, 3366, 2958, 1603, 1495, 1454  $\text{cm}^{-1}$ ;  $^1\text{H}$  NMR ( $\text{CDCl}_3$ , 400 MHz)  $\delta$  0.79 (d,  $J = 6.8$  Hz, 3H,  $\text{CH}_3$ ), 1.70 (br, 2H,  $\text{NH}_2$ ), 2.31 (qd,  $J = 8.0, 6.8$  Hz, 1H,  $\text{CHCH}_3$ ), 2.42 (m, 2H,  $\text{PhCH}_2\text{CH}_2$ -), 2.75 (m, 2H,  $\text{PhCH}_2$ ), 3.53 (d,  $J = 8.8$  Hz, 1H,  $\text{CHNH}$ ), 5.32 (m, 1H,  $-\text{CH}_2\text{CH}=\text{CH}-$ ), 5.53 (td,  $J = 13.6, 6.4$  Hz, 1H,  $\text{CH}_2\text{CH}=\text{CH}$ ), 7.21-7.29 (m, 10H, Ph-);  $^{13}\text{C}$  NMR ( $\text{CDCl}_3$ , 100 MHz)  $\delta$  18.13 (q), 34.44 (t), 35.87 (t), 45.24 (d), 60.96 (d), 125.83 (d), 126.99 (d), 127.37 (d), 128.27 (d), 128.32 (d), 128.58 (d), 131.00 (d), 134.13 (d), 141.87 (s), 144.67 (s); LRMS  $\text{C}_{19}\text{H}_{23}\text{N} + \text{H}^+$  calcd  $m/z$  266.2, found  $m/z$  266.5;  $[\alpha]_{\text{D}}^{25} = -57.7^{\circ}$  ( $c$  0.10,  $\text{CHCl}_3$ ).

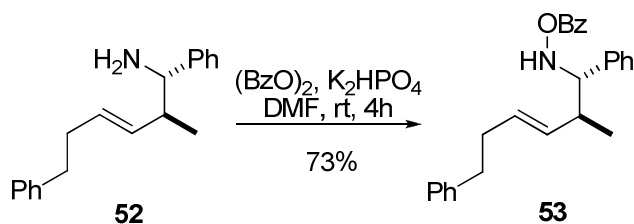

**O-benzoyl-N-((1S,2S,E)-2-methyl-1,6-diphenylhex-3-enyl)hydroxylamine (53):** To a suspension of 309 mg (1.28 mmol) of dibenzoyl peroxide and 277 mg (1.59 mmol) of dipotassium hydrogen phosphate in 10 mL of DMF was added a solution of 282 mg (1.14 mmol) of amine **52** in 2 mL of DMF under argon. The suspension was stirred at room temperature for 16 h. When the reaction was judged complete by TLC, 21 mg (0.26 mmol) of piperidine was added and the resulting solution was stirred for 10 min to remove excess dibenzoyl peroxide. (Note: Dibenzoyl peroxide and benzoylamine **53** are inseparable via column chromatography.) The mixture was poured into 50 mL of deionized water and stirred for 30 min until the suspension turned clear. The mixture was extracted with 50 mL of ethyl acetate (2×). The organic phase was washed with 50 mL of sat. aq. NaHCO<sub>3</sub> solution and 50 mL of brine, dried (MgSO<sub>4</sub>), and concentrated *in vacuo*. The residue was purified by flash chromatography with 50 g of silica gel, eluting with 5% ethyl acetate in hexanes to give 299 mg (73%) of benzoylamine **53** as a colorless oil.

Data for amine **53**: IR (neat) 3233, 3028, 1721, 1602, 1495, 1453 cm<sup>-1</sup>; <sup>1</sup>H NMR (CDCl<sub>3</sub>, 400 MHz) δ 0.73 (d, *J* = 6.8 Hz, 3H, CH<sub>3</sub>), 2.36 (m, 2H, -CH<sub>2</sub>CH<sub>2</sub>Ph), 1.51 (br, 1H, NH), 2.45 (qd, *J* = 9.2, 7.2 Hz, 1H, CH<sub>3</sub>CH), 2.69 (t, *J* = 7.6 Hz, 2H, -CH<sub>2</sub>Ph), 3.70 (dd, *J* = 9.2, 2.8 Hz, 1H, CHNH), 5.38 (m, 1H, CH<sub>2</sub>CH=CH-), 5.65 (td, *J* = 15.6, 6.4 Hz, 1H, CH<sub>2</sub>CH=CH), 7.07-7.29 (m, 10H, Ph-), 7.43, 7.74 and 7.95 (m, 5H, C<sub>6</sub>H<sub>5</sub>CO); <sup>13</sup>C NMR (CDCl<sub>3</sub>, 100 MHz) δ 18.13 (q), 34.38 (t), 35.81 (t), 41.14 (d), 70.13 (d), 125.79 (d), 127.59 (d), 128.10 (d), 128.26 (d), 128.30 (s), 128.40 (d), 128.54 (d), 129.26 (d), 132.11 (d), 132.89 (d), 133.14 (d), 139.91 (s), 141.83(s), 166.75 (s); LRMS C<sub>26</sub>H<sub>27</sub>NO<sub>2</sub> + H<sup>+</sup> calcd *m/z* 386.2, found *m/z* 386.4; [α]<sub>D</sub><sup>25</sup> = + 64.5° (c 0.10, CHCl<sub>3</sub>).



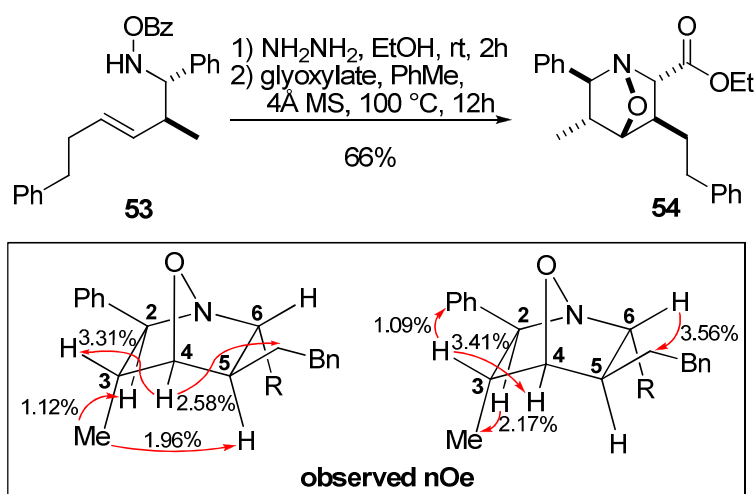

**Preparation of (2*S*,3*R*,4*S*,5*R*,6*S*)-ethyl 5-methyl-3-phenethyl-6-phenyl-7-oxa-1-azabicyclo[2.2.1]-heptane-2-carboxylate (**54**):** To a solution of 110 mg (0.28 mmol) of benzoylamine **53** in 10 mL of degassed anhydrous ethanol was added 0.5 mL of hydrazine hydrate under argon. After stirring for 4 h, the crude solution was concentrated *in vacuo*, then dissolved in 10 mL of dichloromethane under argon. The dichloromethane solution was concentrated *in vacuo* again, then was dissolved in 10 mL of anhydrous toluene under argon. The solution of hydroxylamine in toluene was added into a 25 mL sealed tube with 0.5 g of activated 4 Å molecular sieves. A solution of 60 μL (60 mg, 0.29 mmol) of ethyl glyoxylate (50% wt in H<sub>2</sub>O) was added to the reaction mixture via a syringe. The reaction was heated at 100 °C for 12 h, then cooled down to room temperature. The crude solution was concentrated *in vacuo*. The residue was purified by chromatography over 10 g of silica gel (5% ethyl acetate in hexanes) to give 68 mg (66%, d.r. ≥ 20:1) of oxazabicyclo[2.2.1]heptanes **54** as a water white oil. No evidence was found for the presence of other isomeric product.

Data for oxazabicyclo[2.2.1]heptane **54**: IR (neat) 3027, 2932, 1733, 1454, 1030 cm<sup>-1</sup>; <sup>1</sup>H NMR (CDCl<sub>3</sub>, 400 MHz) δ 1.22 (d, *J* = 6.8 Hz, 3H, CH<sub>3</sub>), 1.30 (t, *J* = 6.8 Hz, 3H, OCH<sub>2</sub>CH<sub>3</sub>), 1.91 (m, 2H, BnCH<sub>2</sub>-), 2.51 (m, 1H, C(5)HCH<sub>3</sub>), 2.71 (m, 2H, -CH<sub>2</sub>Ph), 2.72 (m, 1H, C(3)H), 3.57 (d, *J* = 6.0 Hz, 1H, C(6)HNO), 3.84 (d, *J* = 5.6 Hz, 1H, C(2)H), 4.24 (m, 2H, OCH<sub>2</sub>CH<sub>3</sub>), 4.52 (d, *J* = 4.4 Hz, 1H, C(4)H), 7.22-7.42 (m, 10H, Ph-); <sup>13</sup>C NMR

(CDCl<sub>3</sub>, 100 MHz)  $\delta$  12.39 (q), 14.16 (q), 34.21 (t), 35.26 (t), 40.80 (d), 49.11 (d), 61.50 (t), 72.32 (d), 76.58 (d), 89.66 (d), 126.07 (d), 126.45 (d), 127.04 (d), 128.39 (d), 128.48 (d), 141.37 (s), 143.01 (s), 169.22 (s); HRMS C<sub>23</sub>H<sub>27</sub>NO<sub>3</sub> + H<sup>+</sup> calcd *m/z* 366.2069, found *m/z* 366.2065;  $[\alpha]_D^{25} = +17.7^\circ$  (c 0.10, CHCl<sub>3</sub>).

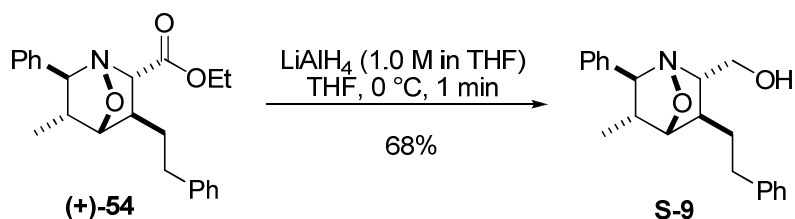

**(R)- and (S)-MTPA derivatives for the determination of the absolute configuration of oxazabicyclo[2.2.1]heptane (+)-54:** To a solution of 10 mg (0.03 mmol) of oxazabicyclo[2.2.1]heptane (+)-54 in 1 mL of anhydrous THF was added 0.03 mL (0.03 mmol) of 1.0 M LiAlH<sub>4</sub> in THF via a syringe at 0 °C under argon. After 1 min, sequential addition of 0.03 mL of water, 0.03 mL of 1.0 N NaOH and 0.1 mL of water was followed by vigorous stirring for 10 min. The organic phase was concentrated with 0.5 g of silica gel *in vacuo*, and the residue was chromatographed over 2 g of silica gel (Hexanes : EtOAc = 20:1) to give 6 mg (68%, 94% ee by Mosher's ester) of alcohol S-9 as a colorless oil.

Data for alcohol S-9: IR (neat) 3400, 3026, 2926, 1603, 1495, 1029 cm<sup>-1</sup>; <sup>1</sup>H NMR (CDCl<sub>3</sub>, 400 MHz)  $\delta$  1.10 (d, *J* = 7.2 Hz, 3H, CH<sub>3</sub>), 1.71 and 1.82 (m, 2H, BnCH<sub>2</sub>-), 1.90 (m, 1H, C(5)HCH<sub>3</sub>), 2.37 (m, 1H, C(3)H), 2.71 (t, *J* = 8.0 Hz, 2H, -CH<sub>2</sub>Ph), 3.26 (m, 1H, C(6)HNO), 3.66 (d, *J* = 5.6 Hz, 1H, C(2)H), 3.81 (ABq, *J* = 12.0, 8.4 Hz, 1H, CH<sub>2</sub>OH), 3.86 (ABq, *J* = 12.0, 4.8 Hz, 1H, CH<sub>2</sub>OH), 4.39 (d, *J* = 4.8 Hz, 1H, C(4)H), 7.22-7.42 (m, 10H, Ph-); <sup>13</sup>C NMR (CDCl<sub>3</sub>, 100 MHz)  $\delta$  12.19 (q), 34.38 (t), 35.18 (t), 39.83 (d), 49.67 (d), 60.96 (t), 69.04 (d), 75.61 (d), 89.26 (d), 126.07 (d), 126.48 (d), 126.90 (d), 128.35 (d), 128.49 (d), 128.51 (d), 141.45 (s), 143.67 (s); LRMS C<sub>21</sub>H<sub>26</sub>NO<sub>2</sub> + H<sup>+</sup> calcd *m/z* 324.2, found *m/z* 324.4.

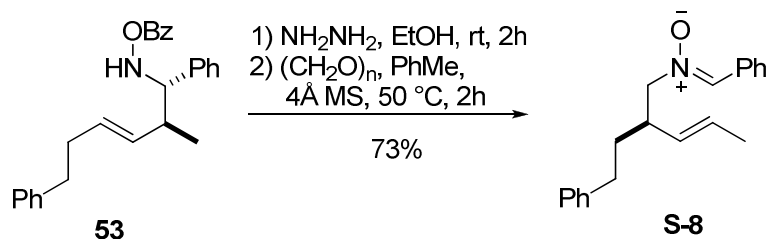

**Preparation of (*R,3E,NZ*)-*N*-benzylidene-2-phenethylpent-3-en-1-amine oxide (**S-8**):**

To a solution of 110 mg (0.28 mmol) of benzoylamine **53** in 10 mL of degassed anhydrous ethanol was added 0.5 mL of hydrazine hydrate under argon. After stirring for 4 h, the crude solution was concentrated *in vacuo*, then dissolved in 10 mL of dichloromethane under argon. The dichloromethane solution was concentrated *in vacuo* again, then was dissolved in 10 mL of anhydrous toluene under argon. The prepared solution of hydroxylamine in toluene was added into a 25 mL sealed tube with 0.5 g of activated 4 Å molecular sieves and 42 mg (1.4 mmol) of paraformaldehyde. The reaction was heated at 50 °C for 2 h before cooling down to room temperature. The crude solution was concentrated *in vacuo*. The residue was purified by chromatography over 10 g of silica gel (20% ethyl acetate in hexanes) to give 60 mg (73%, d.r.  $\geq$  20:1, *E:Z*  $\geq$  20:1) of nitronium **S-8** as a colorless oil.

Data for nitronium **S-8**: IR (neat) 3060, 2935, 2855, 1670, 1566, 1494, 1454  $\text{cm}^{-1}$ ;  $^1\text{H}$  NMR ( $\text{CDCl}_3$ , 400 MHz)  $\delta$  1.59 and 1.83 (m, 2H,  $\text{PhCH}_2\text{CH}_2$ ), 1.58 (dd,  $J = 6.4, 1.6$  Hz, 3H,  $\text{CH}_3$ ), 2.59 and 2.75 (m, 2H,  $\text{PhCH}_2$ ), 2.99 (m, 1H,  $\text{CHCH}_3$ ), 3.67 (ABq,  $J = 12.0, 8.0$  Hz, 1H,  $\text{CH}_2\text{NO}$ ), 3.87 (ABq,  $J = 12.0, 6.4$  Hz, 1H,  $\text{CH}_2\text{NO}$ ), 5.27 (m, 1H,  $\text{CH}=\text{CHCHR}$ ), 5.65 (qd,  $J = 15.2, 6.4$  Hz, 1H,  $\text{CH}_3\text{CH}=\text{CH}$ ), 7.17 (s, 1H,  $\text{ClC}_6\text{H}_4\text{CH}=\text{N}$ ), 7.19-7.28 (m, 5H, Ph-), 7.43 and 8.22 (m, 5H,  $\text{C}_6\text{H}_5\text{CH}=\text{N}$ );  $^{13}\text{C}$  NMR ( $\text{CDCl}_3$ , 100 MHz)  $\delta$  18.06 (q), 33.42 (t), 34.18 (t), 40.95 (d), 72.01 (t), 125.85 (d), 128.38 (d), 128.40 (s), 128.46 (d), 128.54 (d), 129.15(d), 130.26 (d), 130.39 (s), 130.43 (d), 134.72 (d), 142.04 (s); LRMS  $\text{C}_{20}\text{H}_{23}\text{NO} + \text{H}^+$  calcd  $m/z$  294.2, found  $m/z$  294.5.

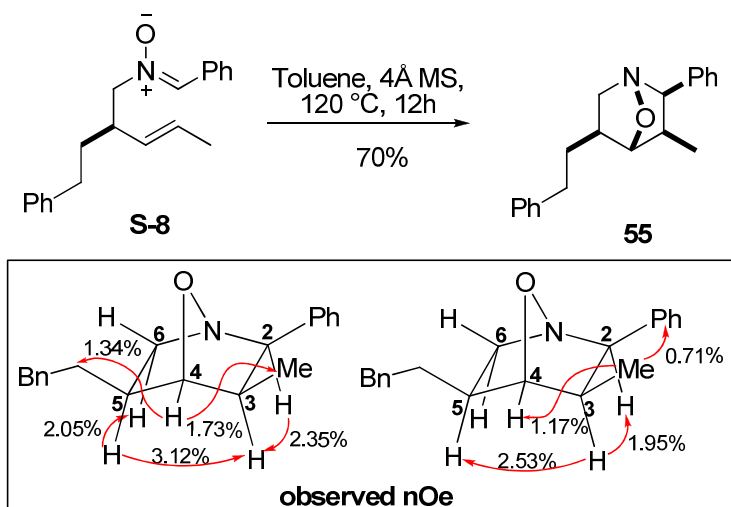

**Preparation of (2*S*,3*S*,4*R*,5*R*)-3-methyl-5-phenethyl-2-phenyl-7-oxa-1-azabicyclo[2.2.1]heptane (55):** To a 25 mL sealed tube with 0.5 g of activated 4 Å molecular sieves was added a solution of 60 mg of nitron **S-8** in 10 mL of anhydrous toluene. The reaction was heated at 120 °C for 12 h before cooled down to room temperature. The crude was concentrated *in vacuo*. The residue was purified by chromatography over 10 g of silica gel (5% ethyl acetate in hexanes) to give 42 mg (70%, d.r. ≥ 20:1) of oxazabicyclo[2.2.1]heptane **55** as a colorless oil. No evidence was found for the presence of other isomeric product.

Data for oxazabicyclo[2.2.1]heptane **55**: IR (neat) 3061, 2929, 1657, 1494, 1452 cm<sup>-1</sup>; <sup>1</sup>H NMR (CDCl<sub>3</sub>, 400 MHz) δ 0.45 (d, *J* = 7.2 Hz, 3H, CH<sub>3</sub>), 1.57 and 1.82 (m, 2H, PhCH<sub>2</sub>CH<sub>2</sub>), 1.93 (m, 1H, C(5)H), 2.26 (dq, *J* = 8.0, 7.2 Hz, 1H, C(3)HCH<sub>3</sub>), 2.58 (m, 2H, PhCH<sub>2</sub>), 2.74 (ABq, *J* = 11.6, 4.8 Hz, 1H, C(6)H<sub>2</sub>NO), 3.00 (ABq, *J* = 11.6, 8.0 Hz, 1H, C(6)H<sub>2</sub>NO), 3.88 (d, *J* = 8.0 Hz, 1H, C(2)HNO), 4.08 (s, 1H, C(4)H), 7.10-7.23 (m, 10H, Ph-); <sup>13</sup>C NMR (CDCl<sub>3</sub>, 100 MHz) δ 16.13 (q), 34.13 (t), 35.63 (t), 45.27 (d), 45.27 (d), 63.37 (t), 74.13 (d), 89.03 (d), 125.97 (d), 126.48 (d), 127.60 (d), 127.82 (d), 128.44 (d), 128.46 (s), 139.44 (s), 141.70 (s); HRMS C<sub>20</sub>H<sub>23</sub>NO + H<sup>+</sup> calcd *m/z* 294.1858, found *m/z* 294.1856; [α]<sub>D</sub><sup>25</sup> = + 30.3° (c 0.10, CHCl<sub>3</sub>).

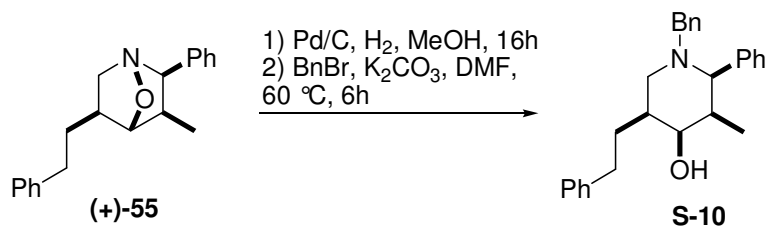

**(R)- and (S)-MTPA derivatives for the determination of the absolute configuration**

**of oxazabicyclo[2.2.1]heptane (+)-55:** To a suspension of 6 mg of Pd/C (5 wt.%) in 2 mL of methanol was added a solution of 10 mg (0.03 mmol) of oxazabicyclo[2.2.1]heptane (+)-55 in 1 mL of methanol under H<sub>2</sub> at room temperature. After stirring for 16 h, the black suspension was filtered through a celite pad. The filtrate was concentrated *in vacuo*, and the resulting residue was dissolved in 1 mL of anhydrous DMF. To the solution was added sequentially 5 mg (0.03 mmol) of benzyl bromide and 4 mg (0.03 mmol) of K<sub>2</sub>CO<sub>3</sub> under argon. The white suspension was stirred at 60 °C for 6 h before pouring into 5 mL of H<sub>2</sub>O. After a vigorous stirring for an additional 30 min, the mixture was extracted with 10 mL of EtOAc. The organic phase was dried (MgSO<sub>4</sub>), concentrated, and chromatographed over 2 g of silica gel (Hexanes : EtOAc = 20 : 1) to give 4 mg (40%, 93% ee by Mosher's ester) of alcohol **S-10** as a colorless oil.

Data for alcohol **S-10**: <sup>1</sup>H NMR (CDCl<sub>3</sub>, 400 MHz) δ 0.62 (d, *J* = 7.2 Hz, 3H, CH<sub>3</sub>), 1.29 (d, *J* = 3.6 Hz, 1H, OH), 1.46 and 1.65 (m, 2H, PhCH<sub>2</sub>CH<sub>2</sub>), 1.79 (m, 1H, C(5)H), 1.81 (m, 1H, C(3)HCH<sub>3</sub>), 2.08 (ABq, *J* = 12.0 Hz, 1H, C(6)H<sub>2</sub>), 2.53 (m, 2H, PhCH<sub>2</sub>CH<sub>2</sub>), 2.62 (ABq, *J* = 12.0, 4.0 Hz, 1H, C(6)H<sub>2</sub>NO), 2.74 and 3.60 (ABq, *J* = 13.6 Hz, 2H, PhCH<sub>2</sub>N), 3.10 (d, *J* = 10.4 Hz, 1H, C(2)HNO), 3.73 (m, 1H, C(4)H), 7.10-7.23 (m, 15H, Ph-), LRMS C<sub>27</sub>H<sub>31</sub>NO + H<sup>+</sup> calcd *m/z* 386.2, found *m/z* 386.4.

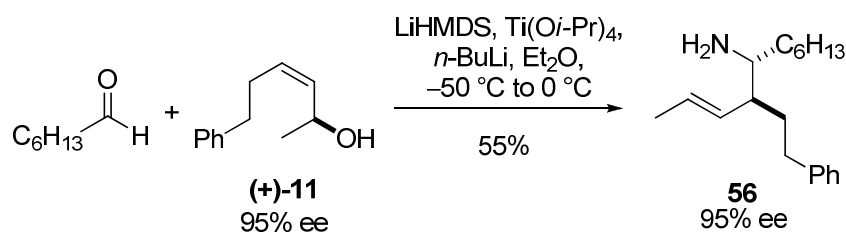

### Preparation of (4*S*,5*R*,*E*)-4-phenethylundec-2-en-5-amine (**56**):

Flask A: To a solution of 272 mg (4.0 mmol) of benzaldehyde in 5 mL of anhydrous ether was added 2.4 mL (2.4 mmol) of 1.0 M LiHMDS in THF at  $-78\text{ }^\circ\text{C}$  under argon. The resulting pale yellow solution was stirred for 20 min, then was cannulated into flask B. (see below)

Flask B: To a solution of 0.74 mL (676 mg, 2.38 mmol) of  $\text{Ti(Oi-Pr)}_4$  in 10 mL of anhydrous ether was added 1.9 mL (4.76 mmol) of 2.5 M *n*-BuLi in hexanes at  $-78\text{ }^\circ\text{C}$  under argon. The reaction was allowed to rise to  $-50\text{ }^\circ\text{C}$  over 20 min, resulting in an orange solution. To the reaction mixture was introduced *N*-TMS imine prepared in flask A. The temperature of the reaction was raised to  $-10\text{ }^\circ\text{C}$  over 1 h, then was kept at  $-10\text{ }^\circ\text{C}$  for 20 min, resulted in a wine-red solution. Next, a solution of lithium alkoxide of alcohol (+)-**11** in 2 mL of THF, prepared by deprotonation of 210 mg (1.19 mmol, 95% ee by Mosher's ester) of alcohol (+)-**11** at  $-78\text{ }^\circ\text{C}$  with 0.52 mL (1.31 mmol) of 2.5 M *n*-BuLi in hexanes followed by 10 min stirring, was added to the wine-red solution at  $-78\text{ }^\circ\text{C}$  via cannula. The mixture was warmed to room temperature over 2h, then was stirred for an additional 12h. Finally, sequential addition of 10 mL of diethyl ether and 5 mL of sat. aq.  $\text{NaHCO}_3$  was followed by vigorous stirring for 1h. The aqueous phase was separated and extracted with 10 mL of diethyl ether (2 $\times$ ). The organic extracts were combined, dried ( $\text{MgSO}_4$ ), and concentrated *in vacuo* to afford a pale yellow oil. The residue was purified by chromatography over 50 g of silica gel ( $\text{CH}_2\text{Cl}_2\text{:MeOH:NH}_4\text{OH} = 400\text{:}10\text{:}1$ ) to give 180 mg (55% yield, d.r.  $\geq 20\text{:}1$ , *E:Z*  $\geq 20\text{:}1$ , 95% ee by Mosher's amide) of homoallylic amine **56** as a colorless oil.

Data for amine **56**: IR (neat) 3295, 2925, 1603, 1495, 1454, 1377  $\text{cm}^{-1}$ ;  $^1\text{H NMR}$  ( $\text{CDCl}_3$ , 400 MHz)  $\delta$  0.81 (t,  $J = 6.8\text{ Hz}$ , 3H,  $\text{CH}_3(\text{CH}_2)_5$ ), 1.13-1.40 (br, 10H,  $\text{CH}_3(\text{CH}_2)_5$ ), 1.66

(dd,  $J = 6.4, 1.6$  Hz, 3H, CH<sub>3</sub>), 1.55 and 1.68 (m, BnCH<sub>2</sub>), 1.85 (m, 1H, CH<sub>2</sub>CH<sub>3</sub>), 2.51 (m, 1H, C<sub>6</sub>H<sub>13</sub>CH<sub>2</sub>-), 2.38 and 2.60 (m, 2H, PhCH<sub>2</sub>), 5.20 (dd,  $J = 13.6, 7.6$  Hz, 1H, CH<sub>3</sub>CH=CH-), 5.32 (qd,  $J = 13.6, 6.4$  Hz, 1H, CH<sub>3</sub>CH=CH), 7.03-7.16 (m, 5H, Ph-); <sup>13</sup>C NMR (CDCl<sub>3</sub>, 100 MHz)  $\delta$  14.08 (q), 18.18 (q), 22.63 (t), 26.23 (t), 29.48 (t), 31.86 (t), 33.66 (t), 33.90 (t), 35.41 (t), 48.45 (d), 54.57 (d), 125.62 (d), 128.03 (d), 128.26 (d), 128.41 (d), 131.46 (d), 142.79 (s); LRMS C<sub>19</sub>H<sub>31</sub>N + H<sup>+</sup> calcd  $m/z$  274.3, found  $m/z$  274.4;  $[\alpha]_D^{25} = +5.6^\circ$  ( $c$  0.10, CHCl<sub>3</sub>).

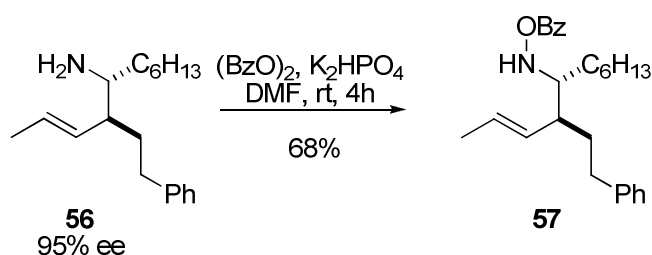

#### Preparation of *O*-benzoyl-*N*-((4*S*,5*R*,*E*)-4-phenethylundec-2-en-5-yl)hydroxylamine (**57**):

To a suspension of 119 mg (0.49 mmol) of dibenzoyl peroxide and 108 mg (0.62 mmol) of dipotassium hydrogen phosphate in 10 mL of DMF was added a solution of 112 mg (0.41 mmol) of amine **56** in 2 mL of DMF under argon. The suspension was stirred at room temperature for 16 h before pouring into 50 mL of deionized water and stirred for 30 min until it turned clear. The mixture was extracted with 50 mL of ethyl acetate (2 $\times$ ). The organic phase was washed with 50 mL of sat. aq. NaHCO<sub>3</sub> solution and 50 mL of brine, dried (MgSO<sub>4</sub>), and concentrated *in vacuo*. The residue was purified by flash chromatography with 50 g of silica gel, eluting with 5% ethyl acetate in hexanes to give 110 mg (68%) of benzoylamine **57** as a colorless oil.

Data for benzoylamine **57**: IR (neat) 2929, 2857, 1719, 1602, 1452, 1270 cm<sup>-1</sup>; <sup>1</sup>H NMR (CDCl<sub>3</sub>, 400 MHz)  $\delta$  0.81 (t,  $J = 6.8$  Hz, 3H, CH<sub>3</sub>(CH<sub>2</sub>)<sub>5</sub>), 1.21 and 1.32 (m, 10 H, CH<sub>3</sub>(CH<sub>2</sub>)<sub>5</sub>), 1.50 (br, 1H, NH), 1.60 and 1.84 (m, 2H, BnCH<sub>2</sub>), 1.67 (dd,  $J = 6.4, 1.2$  Hz, 3H, CH<sub>3</sub>), 2.18 (m, 1H, CH<sub>2</sub>CH<sub>2</sub>Bn), 2.41 and 2.63 (m, 2H, PhCH<sub>2</sub>), 2.87 (m, 1H, C<sub>6</sub>H<sub>13</sub>CH<sub>2</sub>-), 5.28 (dd,  $J = 16.8, 9.2$  Hz, 1H, CH<sub>3</sub>CH=CH-), 5.44 (qd,  $J = 16.8, 6.4$  Hz, 1H, CH<sub>3</sub>CH=CH), 7.16-7.30 (m, 5H, Ph-), 7.50, 7.84 and 7.92 (m, 5H, C<sub>6</sub>H<sub>5</sub>CO); <sup>13</sup>C NMR (CDCl<sub>3</sub>, 100 MHz)  $\delta$  14.07 (q), 18.13 (q), 22.60 (t), 25.96 (t), 29.47 (t), 29.62 (t), 31.71 (t),

32.91 (t), 33.76 (t), 44.44 (d), 64.42 (d), 125.68 (d), 128.27 (d), 128.46 (d), 128.49 (d), 128.68 (s), 128.77 (d), 129.26 (d), 131.12 (d), 133.15 (d), 142.42 (s), 166.63 (s); LRMS  $C_{26}H_{35}NO_2 + H^+$  calcd  $m/z$  394.3, found  $m/z$  394.4;  $[\alpha]_D^{25} = -13.9^\circ$  (c 0.10,  $CHCl_3$ ).

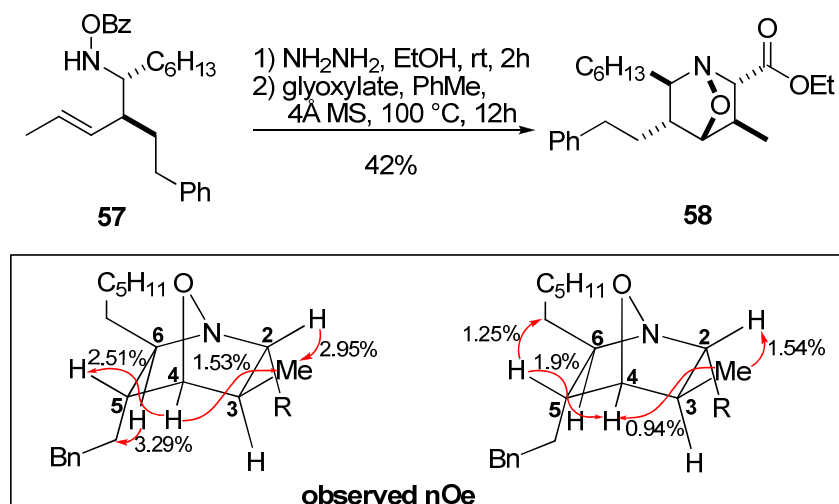

**Preparation of (2*S*,3*R*,4*R*,5*R*,6*R*)-ethyl 6-hexyl-3-methyl-5-phenethyl-7-oxa-1-azabicyclo[2.2.1]-heptane-2-carboxylate (**58**):** To a solution of 80 mg (0.20 mmol) of benzoylamine **57** in 10 mL of degassed anhydrous ethanol was added 0.5 mL of hydrazine hydrate under argon. After stirring for 4 h, the crude solution was concentrated *in vacuo*, then dissolved in 10 mL of dichloromethane under argon. The dichloromethane solution was concentrated *in vacuo* again, then was dissolved in 10 mL of anhydrous toluene under argon. The prepared toluene solution of hydroxylamine was added into a 25 mL sealed tube with 0.5 g of activated 4 Å molecular sieves. A solution of 42  $\mu$ L (42 mg, 0.21 mmol) of ethyl glyoxylate (50% wt in  $H_2O$ ) was added to the reaction mixture via a syringe. The reaction was heated at 100 °C for 12 h before cooling down to room temperature. The crude was concentrated *in vacuo*. The residue was purified by chromatography over 10 g of silica gel (10% ethyl acetate in hexanes) to give 32 mg (42%, d.r.  $\geq$  20:1) of oxazabicyclo[2.2.1]heptane **58** as a water white oil. No evidence was found for the presence of other isomeric product.

Data for oxazabicyclo[2.2.1]heptane **58**: IR (neat) 3437, 2930, 2858, 1733, 1454, 1377, 1202  $cm^{-1}$ ;  $^1H$  NMR ( $CDCl_3$ , 400 MHz)  $\delta$  0.80 (t,  $J = 7.2$  Hz, 3H, CH<sub>3</sub>), 0.96 (d,  $J = 7.2$



Hz, 3H, CH<sub>3</sub>), 1.19 and 1.45 (m, 10H, (CH<sub>2</sub>)<sub>5</sub>), 1.22 (t, *J* = 7.2 Hz, 3H, OCH<sub>2</sub>CH<sub>3</sub>), 1.75 (m, 2H, BnCH<sub>2</sub>-), 1.83 (m, 1H, C(5)HCH<sub>3</sub>), 2.32 (td, *J* = 8.4, 5.2 Hz, 1H, C(6)HNO), 2.49 (m, 1H, C(3)H), 2.51 (m, 2H, -CH<sub>2</sub>Ph), 3.50 (d, *J* = 5.2 Hz, 1H, C(2)H), 4.15 (m, 2H, OCH<sub>2</sub>CH<sub>3</sub>), 4.16 (d, *J* = 4.0 Hz, 1H, C(4)H), 7.11-7.23 (m, 5H, Ph-); <sup>13</sup>C NMR (CDCl<sub>3</sub>, 100 MHz) δ 14.10 (q), 14.14 (q), 18.98 (q), 22.63 (t), 27.20 (t), 29.22 (t), 30.14 (t), 31.82 (t), 35.18 (d), 35.71 (t), 36.42 (t), 51.57 (d), 61.27 (t), 68.80 (d), 77.73 (d), 90.24 (d), 126.10 (d), 128.31 (d), 128.50 (d), 141.45 (s), 169.13 (s); HRMS C<sub>23</sub>H<sub>35</sub>NO<sub>3</sub> + H<sup>+</sup> calcd *m/z* 374.2695, found *m/z* 374.2694; [α]<sub>D</sub><sup>25</sup> = -39.0° (c 0.10, CHCl<sub>3</sub>).

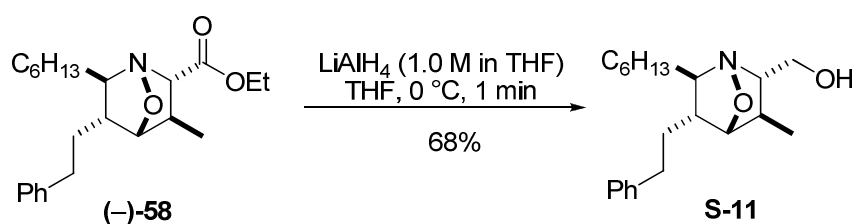

**(R)- and (S)-MTPA derivatives for the determination of the absolute configuration of oxazabicyclo[2.2.1]heptane (-)-58:** To a solution of 10 mg (0.03 mmol) of oxazabicyclo[2.2.1]heptane (-)-58 in 1 mL of anhydrous THF was added 0.03 mL (0.03 mmol) of 1.0 M LiAlH<sub>4</sub> in THF at 0 °C under argon. After 1 min, sequential addition of 0.03 mL of water, 0.03 mL of 1.0 N NaOH and 0.1 mL of water was followed by vigorous stirring for 10 min. The organic phase was concentrated with 0.5 g of silica gel *in vacuo*, and the residue was chromatographed over 2 g of silica gel (Hexanes : EtOAc = 40:1) to give 6 mg (68%, 93% ee by Mosher's ester) of alcohol **S-11** as a colorless oil.

Data for alcohol **S-11**: IR (neat) 3400, 3027, 2926, 2856, 145a, 1028 cm<sup>-1</sup>; <sup>1</sup>H NMR (CDCl<sub>3</sub>, 400 MHz) δ 0.80 (t, *J* = 7.2 Hz, 3H, CH<sub>3</sub>), 0.92 (d, *J* = 7.2 Hz, 3H, CH<sub>3</sub>), 1.20 and 1.50 (m, 10H, (CH<sub>2</sub>)<sub>5</sub>), 1.69 (m, 2H, BnCH<sub>2</sub>-), 1.75 (m, 1H, C(5)HCH<sub>3</sub>), 2.49 (m, 1H, C(3)H), 2.52 (m, 1H, C(2)H), 2.54 (m, 2H, -CH<sub>2</sub>Ph), 3.03 (td, *J* = 8.4, 5.6 Hz, 1H, C(6)HNO), 3.74 (ABq, m, 2H, CH<sub>2</sub>OH), 4.14 (d, *J* = 4.4 Hz, 1H, C(4)H), 7.11-7.23 (m, 5H, Ph-); <sup>13</sup>C NMR (CDCl<sub>3</sub>, 100 MHz) δ 14.10 (q), 18.98 (q), 22.61 (t), 27.25 (t), 29.27 (t), 30.28 (t), 31.81 (t), 35.10 (d), 35.80 (t), 36.44 (t), 51.91 (d), 61.06 (t), 65.03 (d),

76.58 (d), 89.86 (d), 126.14 (d), 128.25 (d), 128.53 (d), 141.50 (s); LRMS C<sub>21</sub>H<sub>33</sub>NO<sub>2</sub> + H<sup>+</sup> calcd *m/z* 332.3, found *m/z* 332.4.

- 
- 1 Love, B. E.; Jones, E. G., *J. Org. Chem.* **1999**, *64*, 3755-3756.
  - 2 Haack, K.-J.; Hashiguchi, S.; Fujii, A.; Ikariya, T.; Noyori, R., *Angew. Chem. Int. Ed.* **1997**, *36*, 285-288.
  - 3 (a) Matsumura, K.; Hashiguchi, S.; Ikariya, T.; Noyori, R., *J. Am. Chem. Soc.* **1997**, *119*, 8738-8739.  
(b) Kiyotsuka, Y.; Kobayashi, Y., *J. Org. Chem.*, **2009**, *74*, 7489-7495.
  - 4 Hoye, T. R.; Jeffrey, C. S.; Shao, F., *Nature Protocols*, **2007**, *2*, 2451-2458.
  - 5 Pearson, A.J.; Sun, H.; Wang, X. *J. Org. Chem.* **2007**, *72*, 2547
  - 6 Takahashi, M.; McLaughlin, M.; Micalizio, G. C., *Angew. Chem. Int. Ed.* **2009**, *48*, 3648-3652.
  - 7 Berman A. M.; Johnson J. S., *J. Org. Chem.* **2006**, *71*, 219-224.
  - 8 Alewood, P. F.; Calder, I. C.; Richardson, R. L., *Syn. Comm.* **1981**, 121-122.

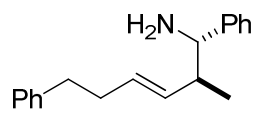

10 (DY-2-165)

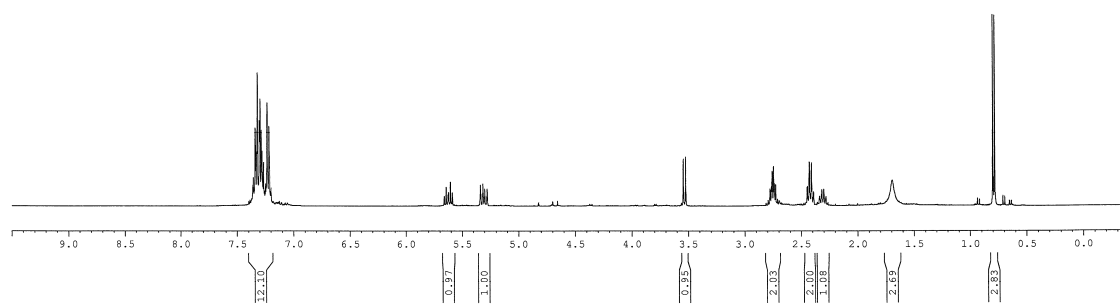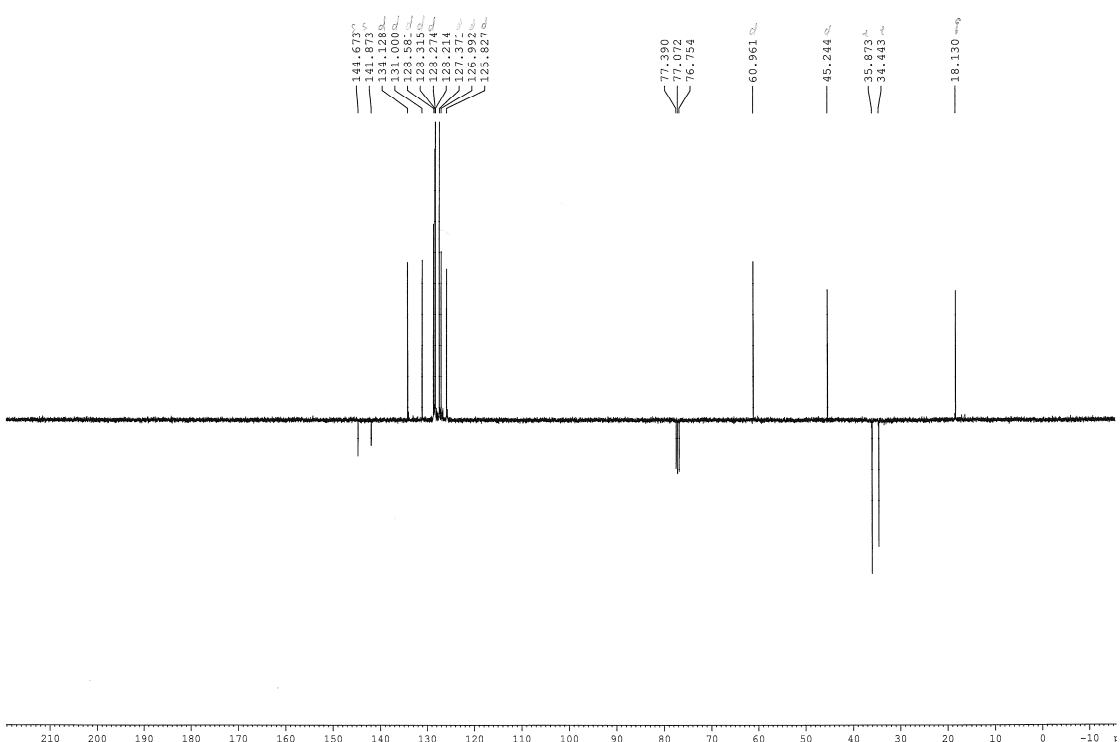

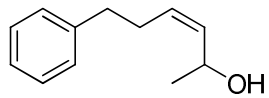

11 (DY-2-255)

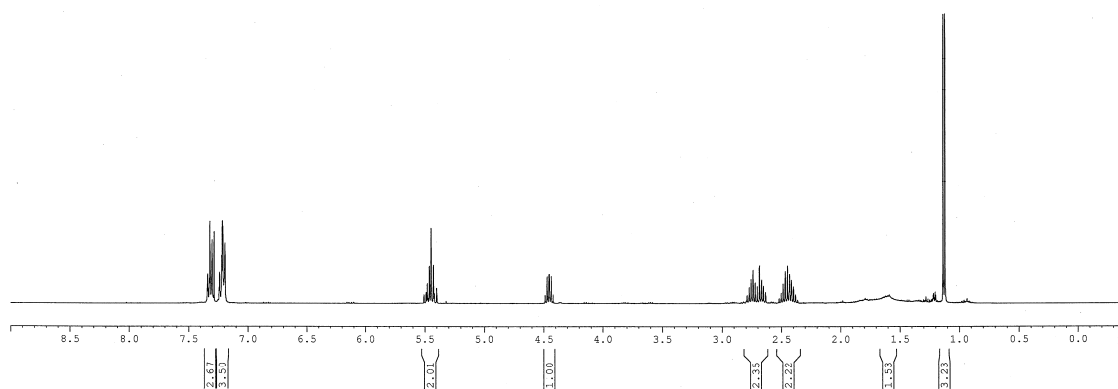

DY-2-255-2 (AP

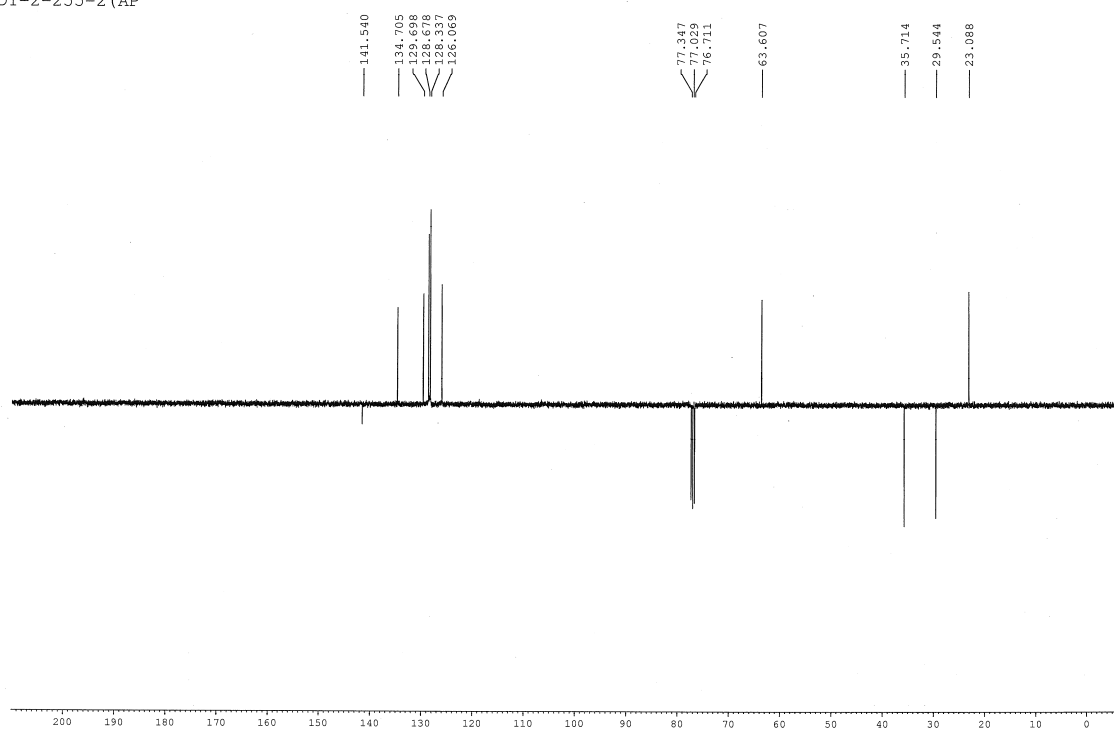

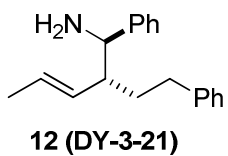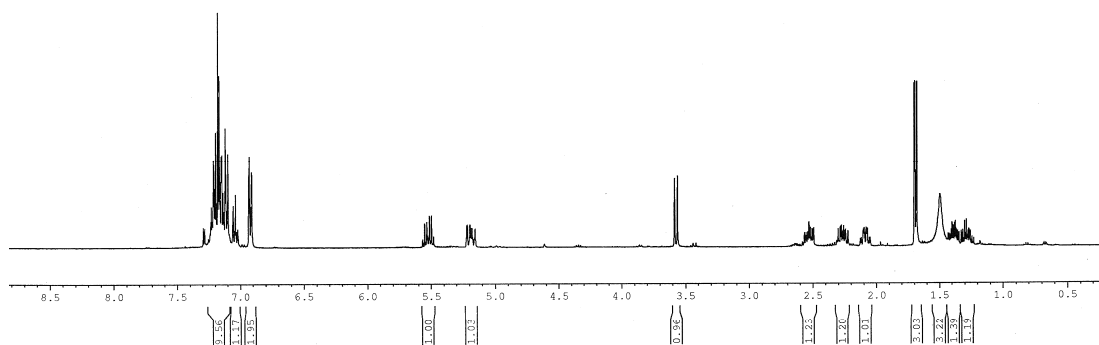

DY-3-21-3 (apt)  
C13APT

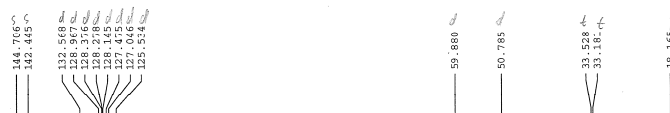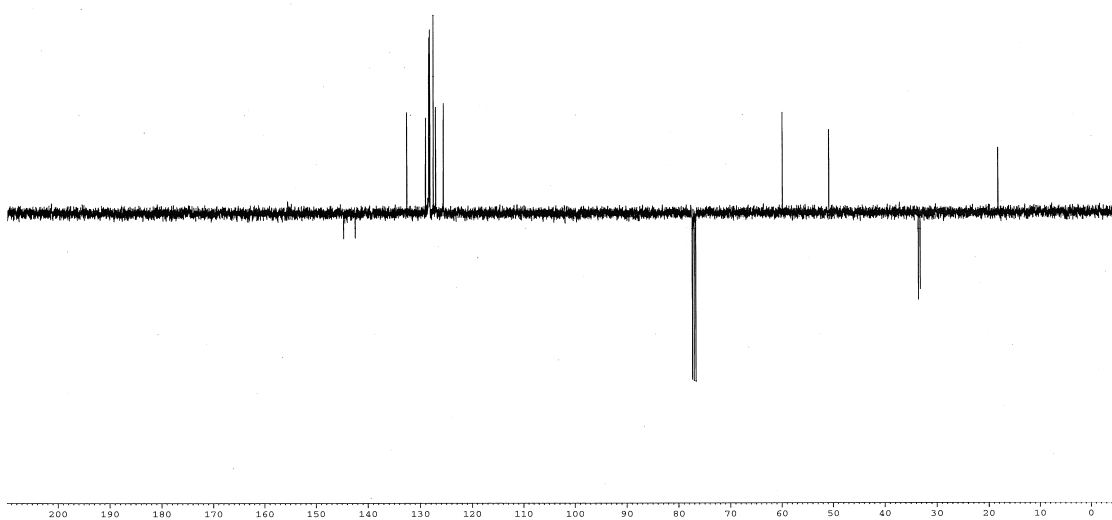

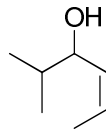

14

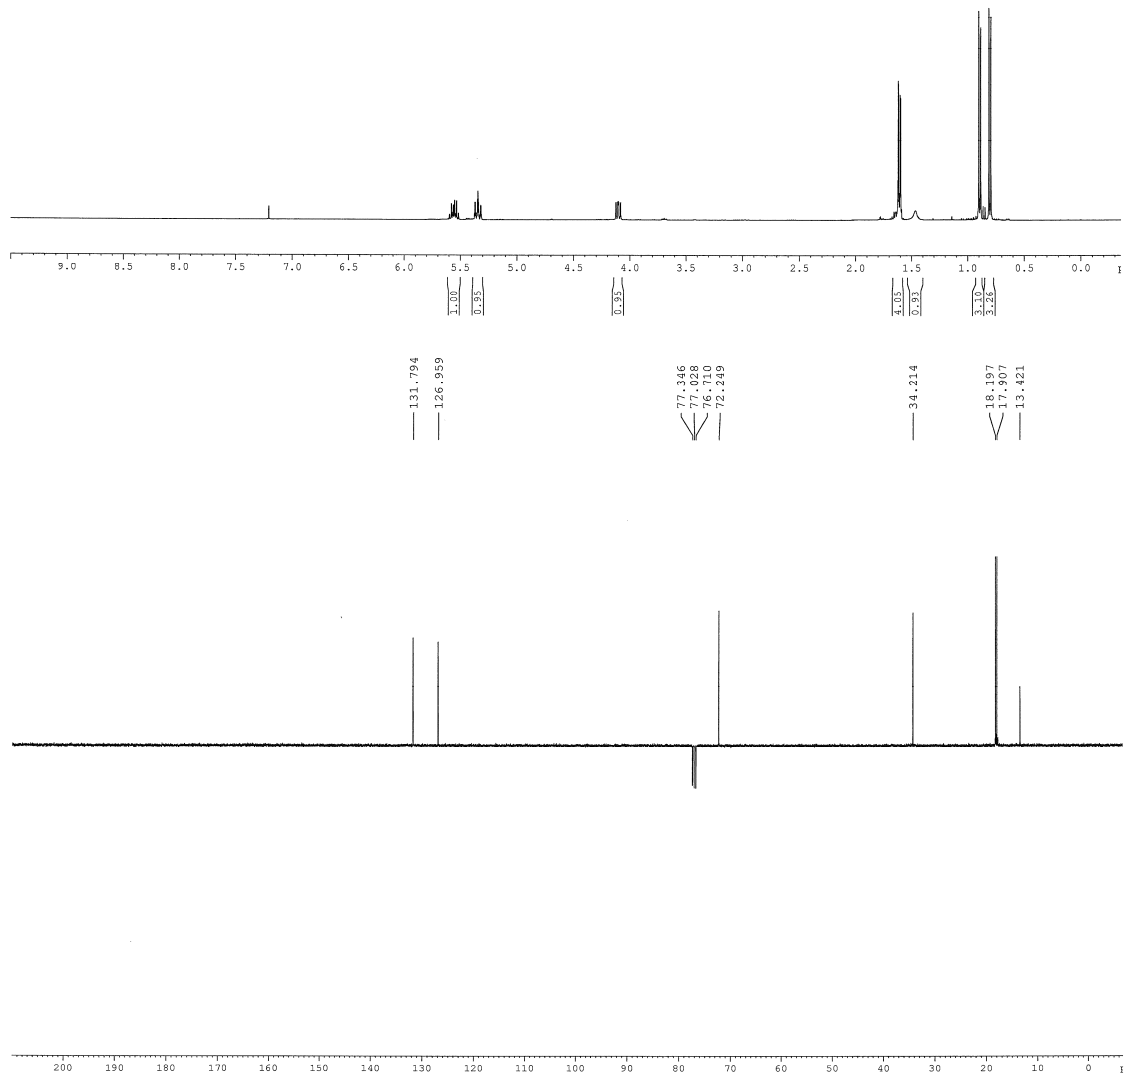

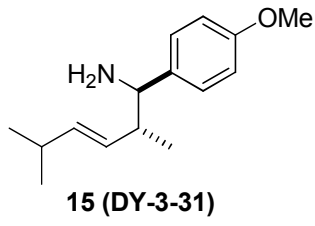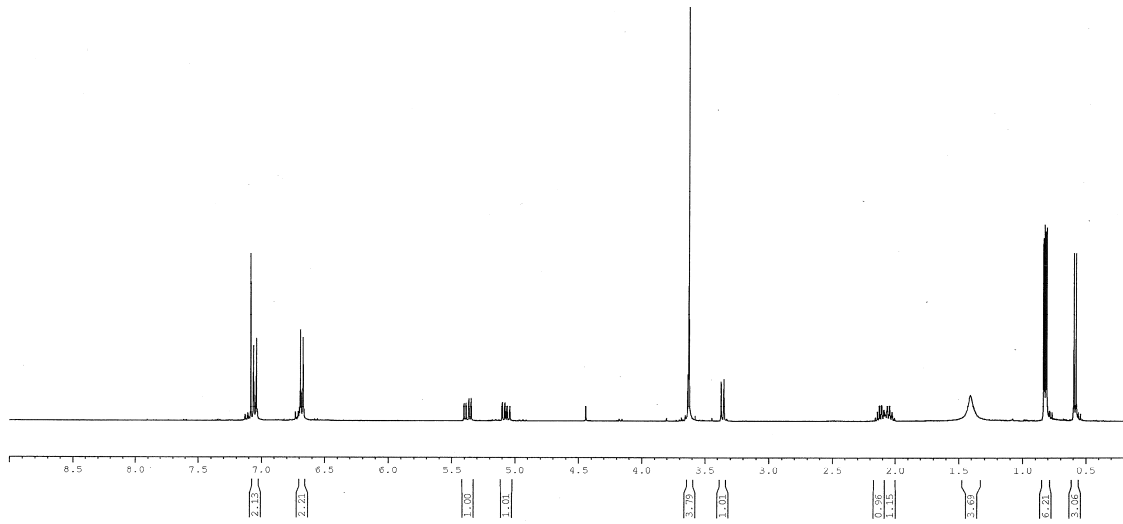

DY-3-31-4 (C)

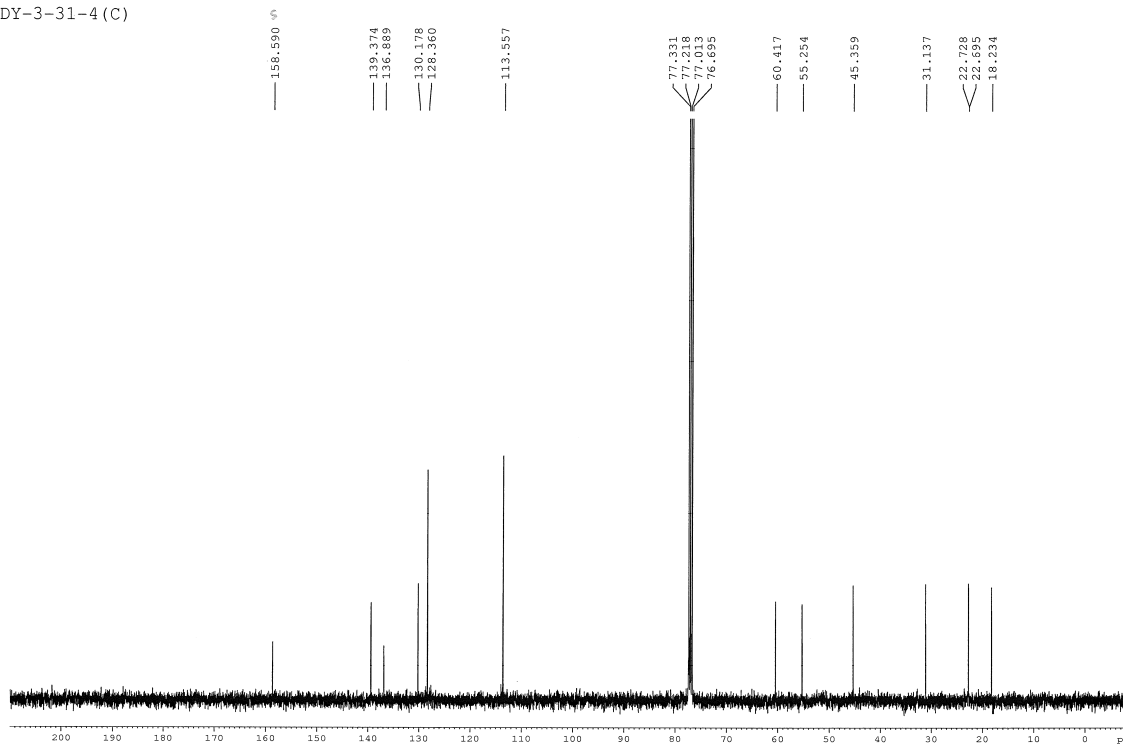

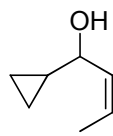

**16 (DY-3-55)**

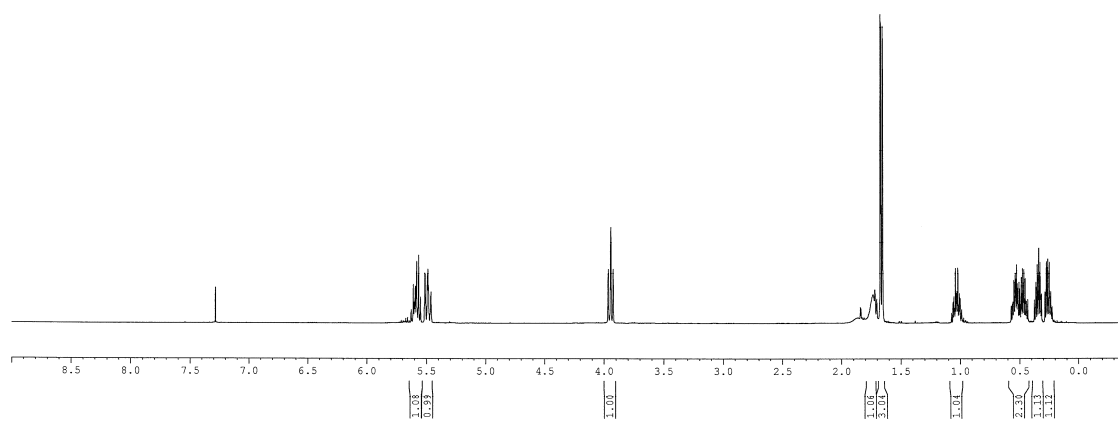

DY-3-55-2 (COSY)

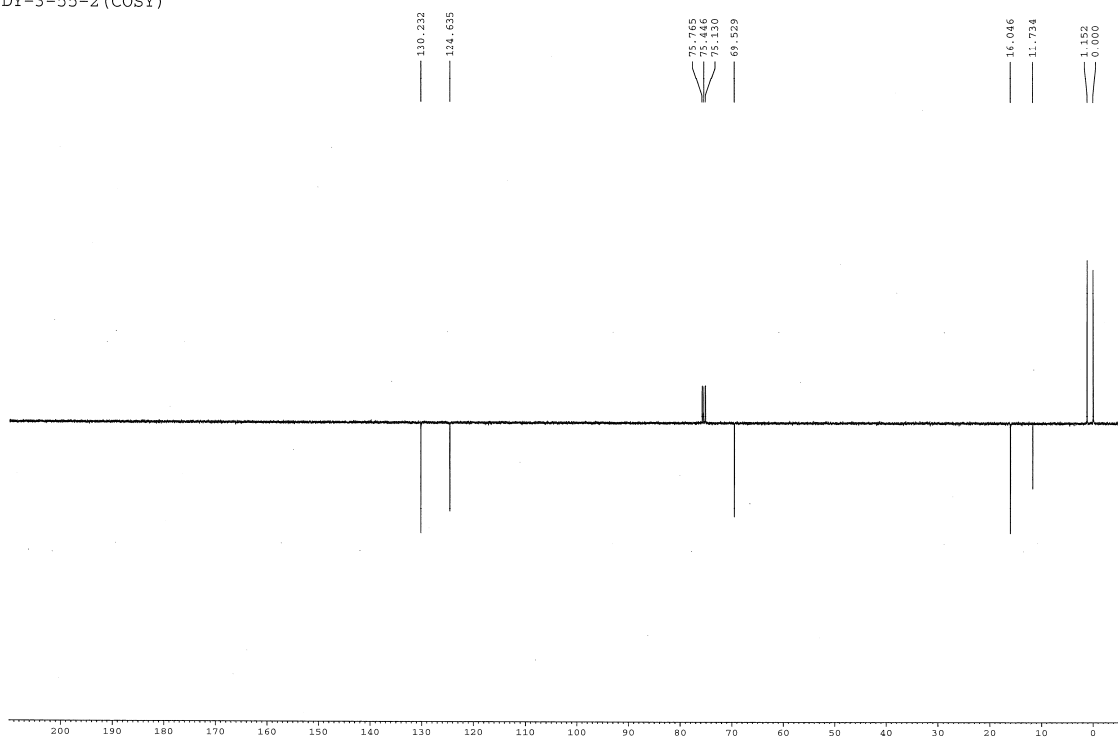



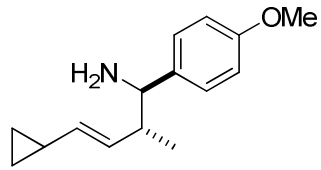

**17 (DY-3-66)**

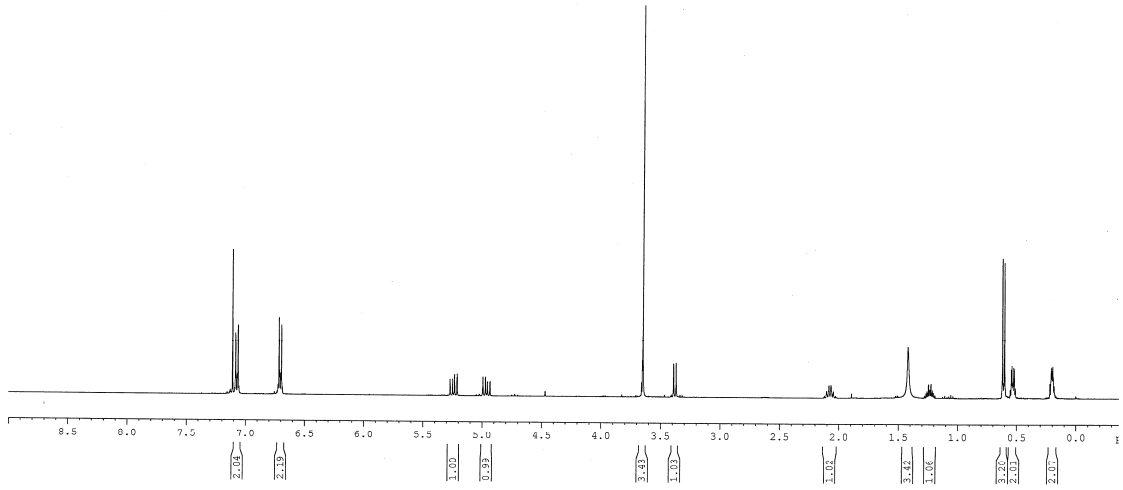

DY-3-66-4 (C)

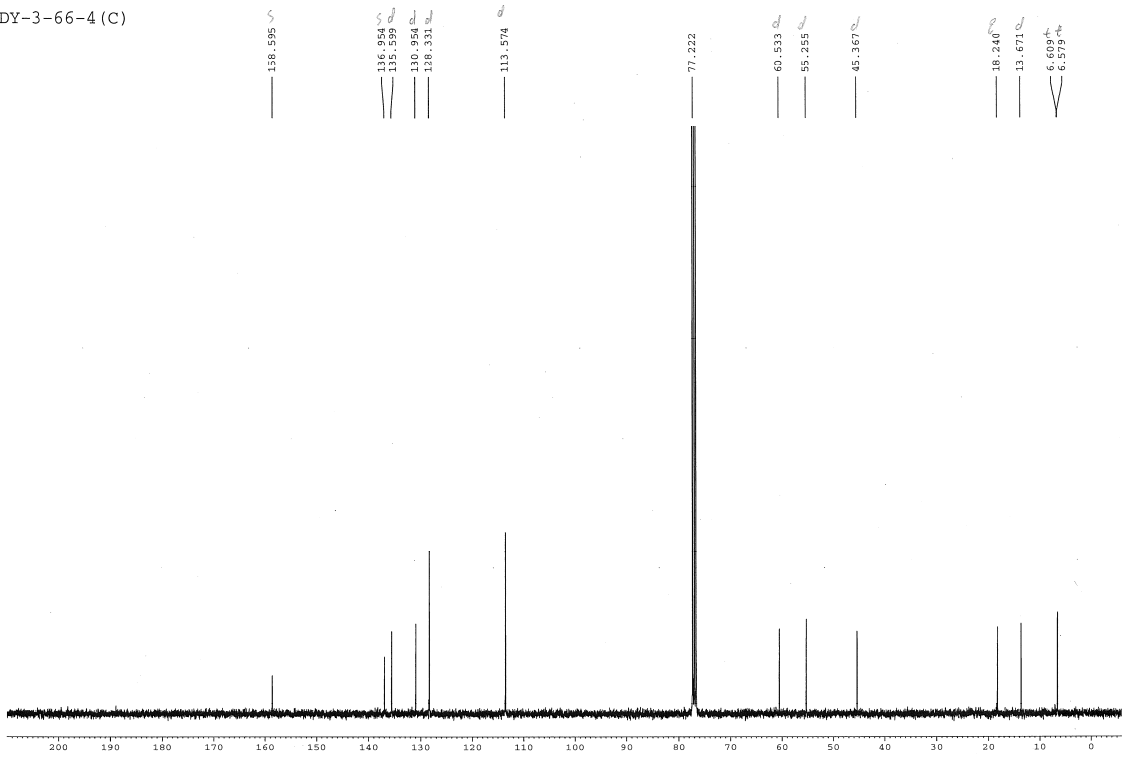

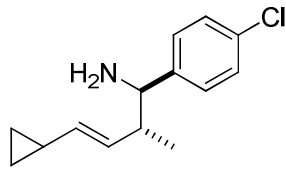

**19 (DY-3-56)**

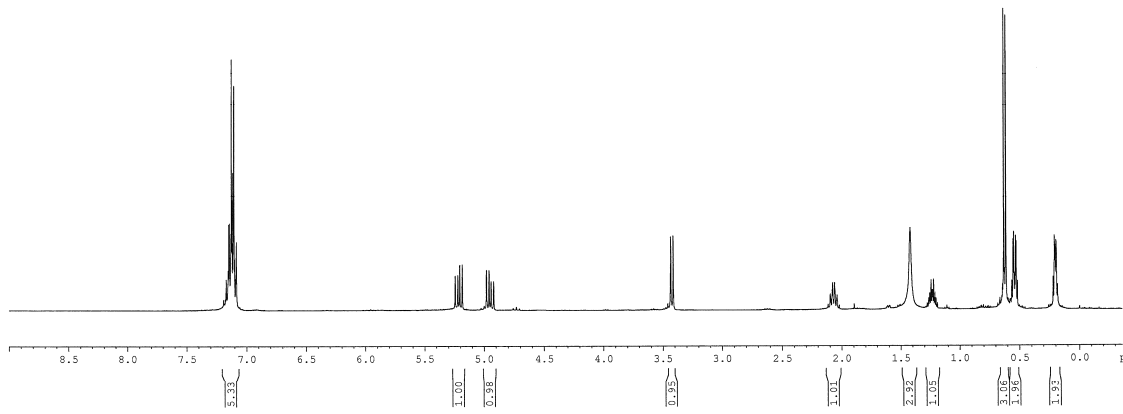

DY-3-57-4 (C)

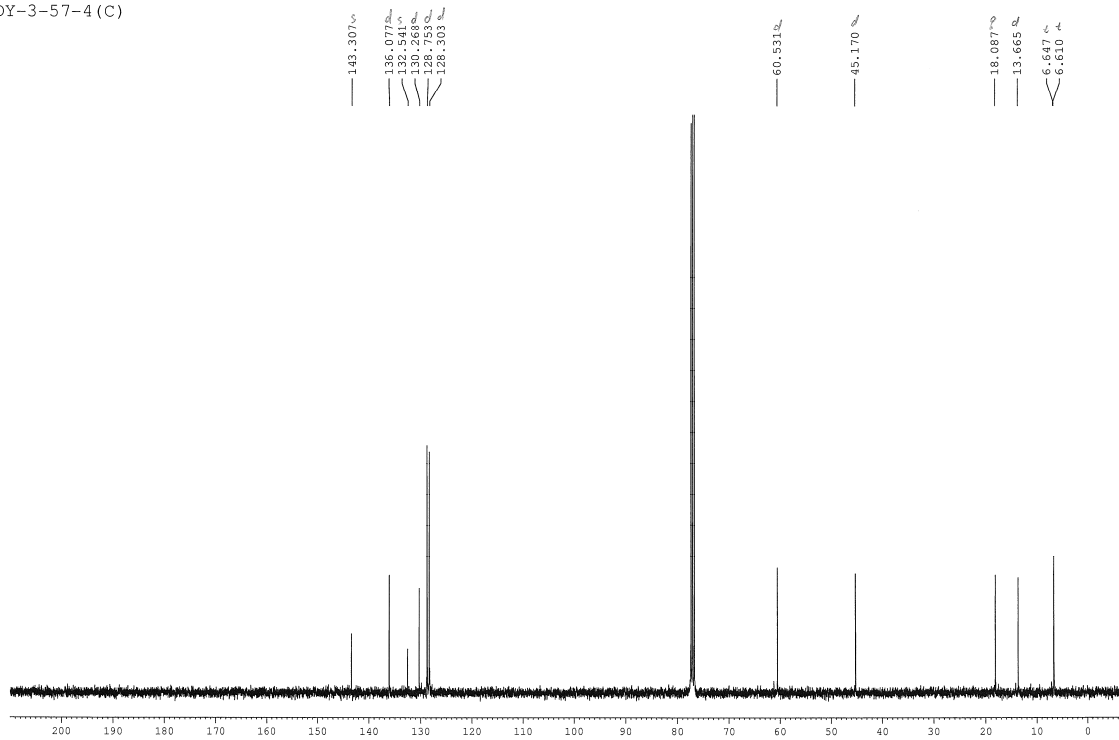

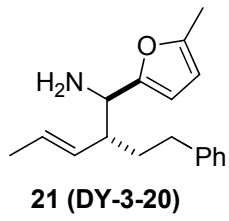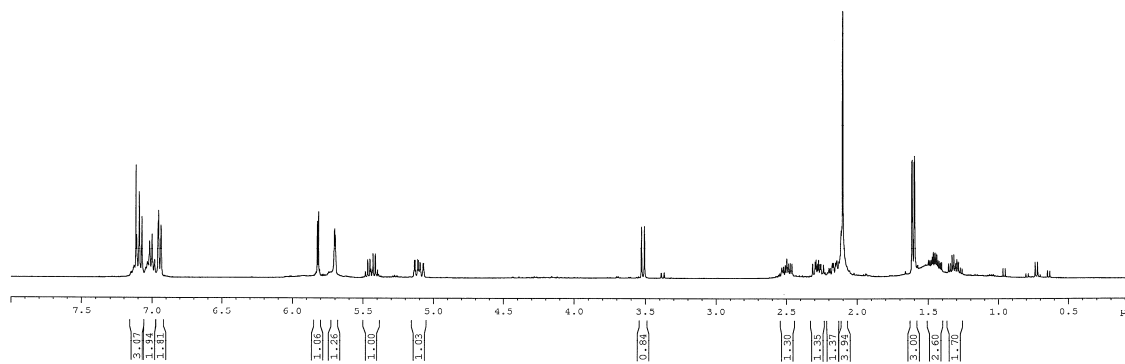

DY-3-20-3 (APT)

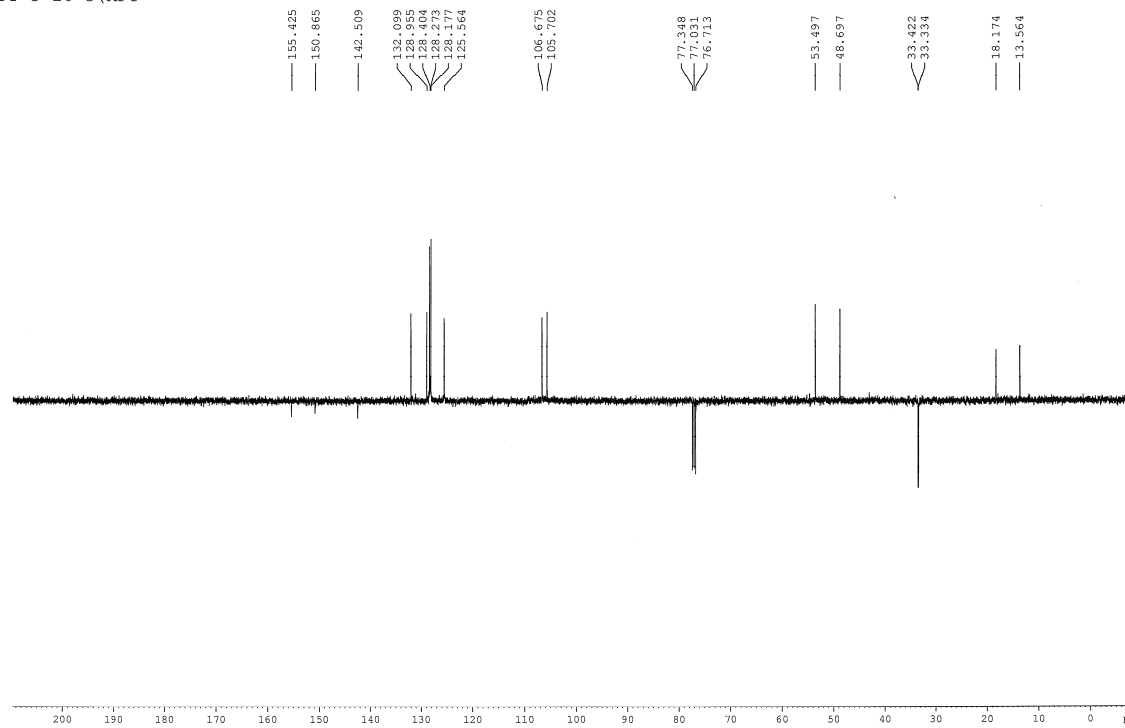

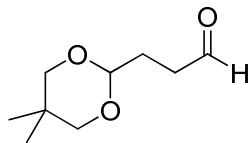

22 (DY-3-37)

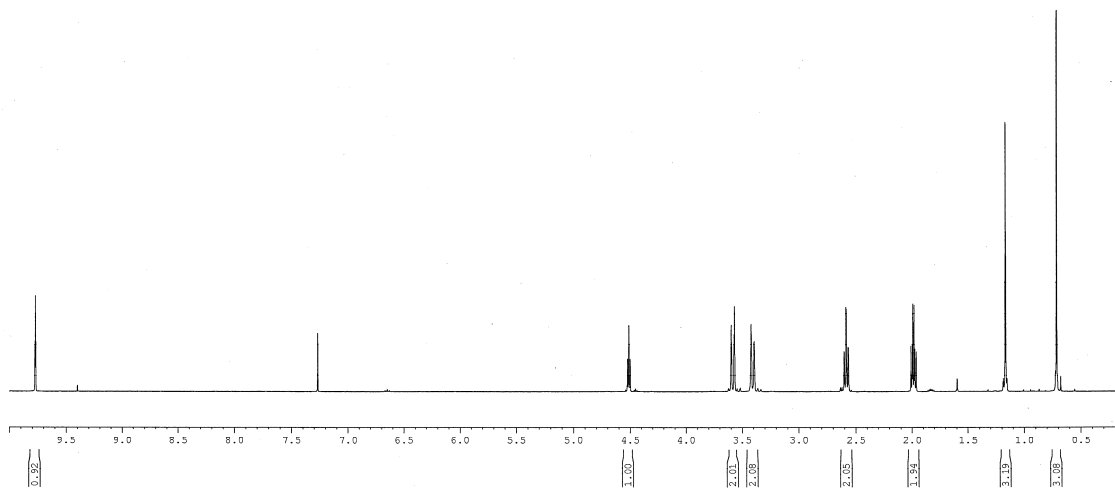

DY-3-37-4 (C)

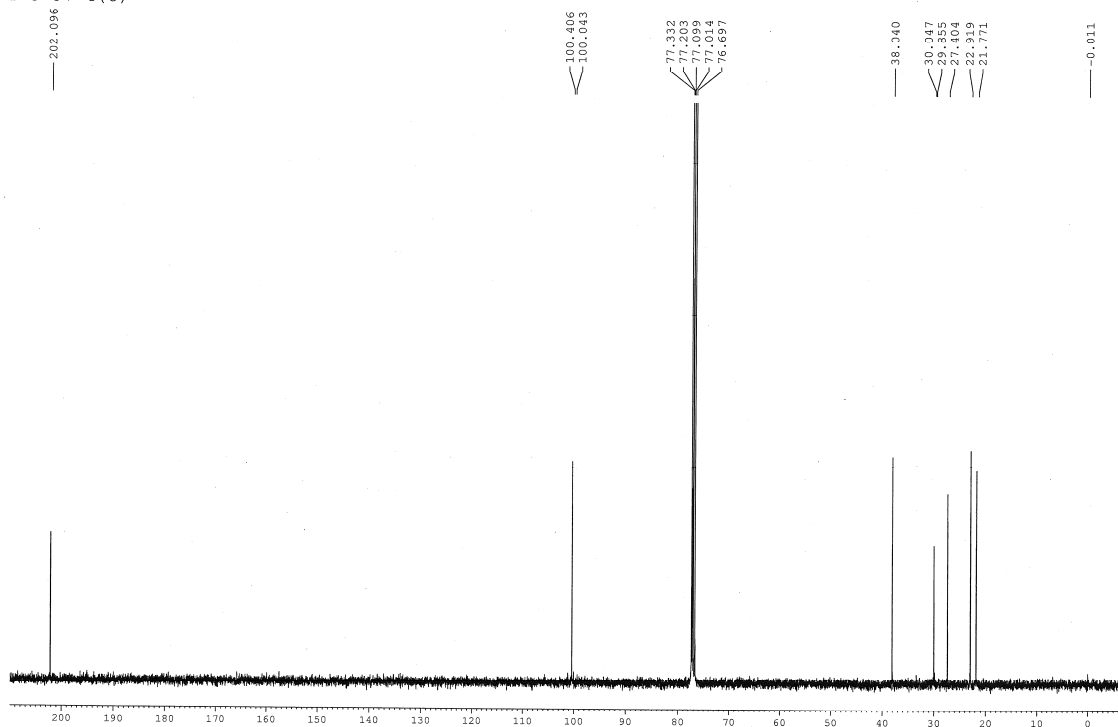

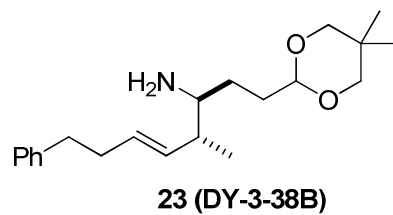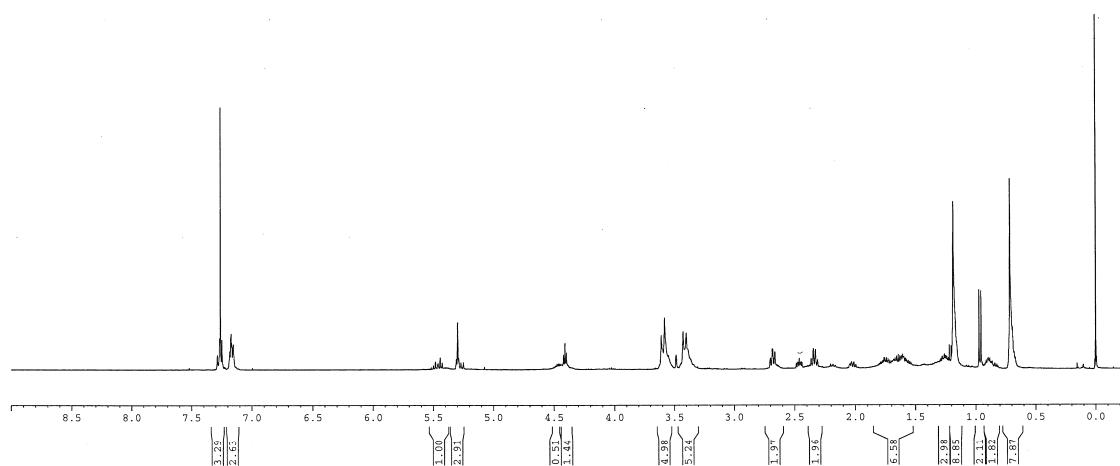

Note: Efforts toward obtaining pure **23** was failed due to its extremely high polarity. Instead, highly concentrated **23** (>90% purity as shown in  $^1\text{H}$  NMR) was used in the following step.

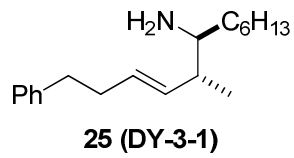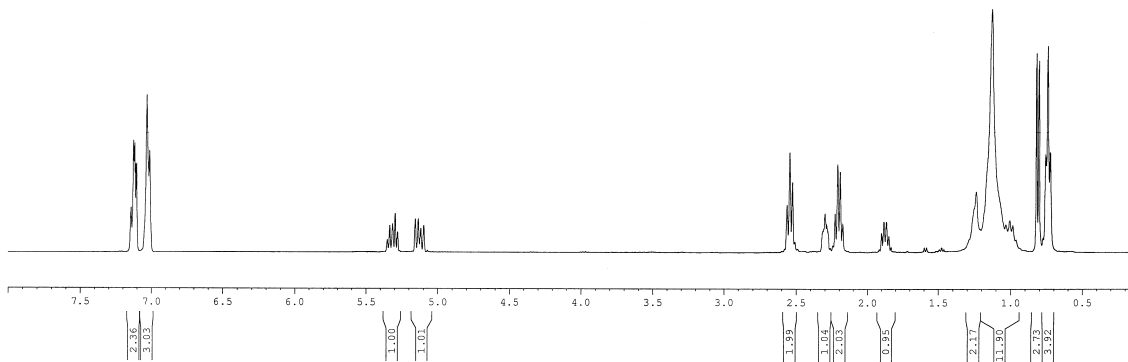

DY-2-199-10 (APT)

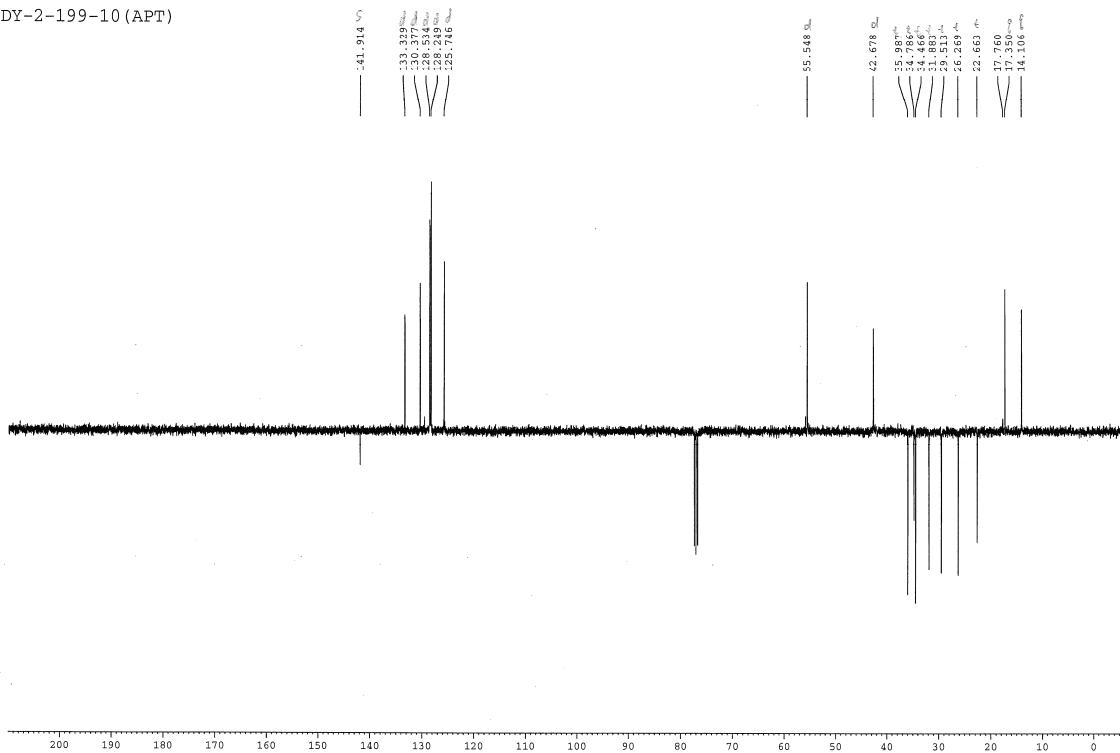

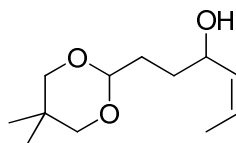

27 (DY-3-44)

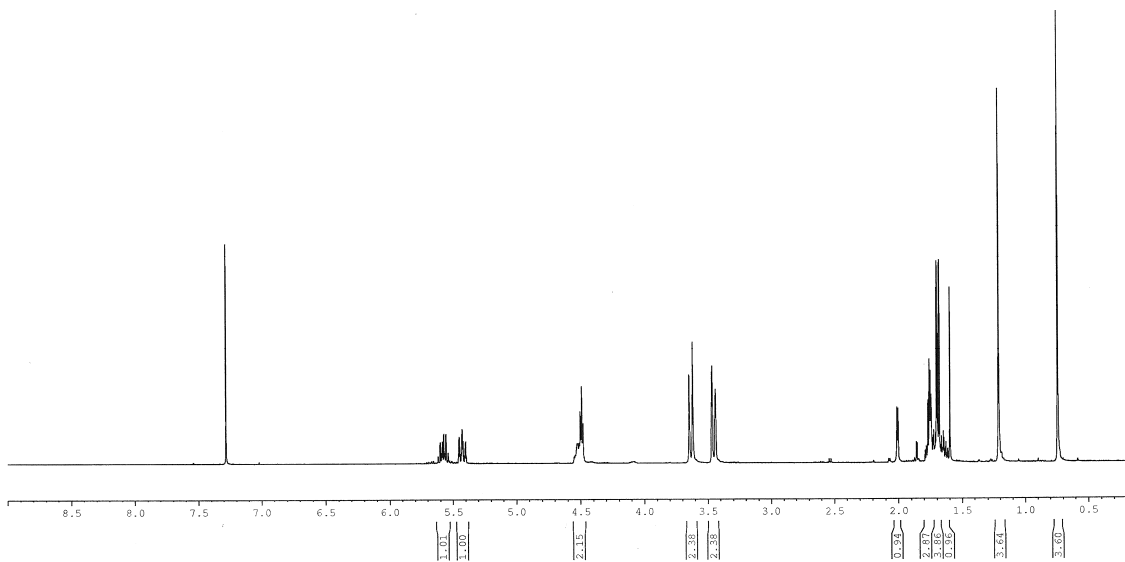

DY-3-44-4 (C)

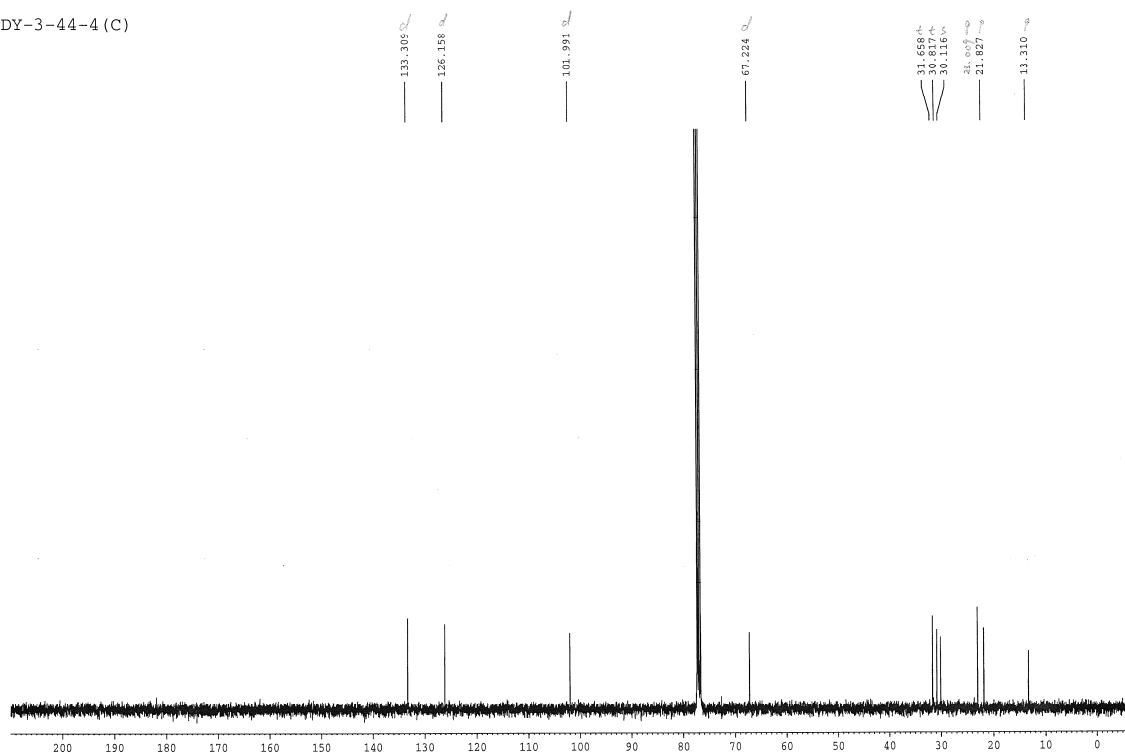

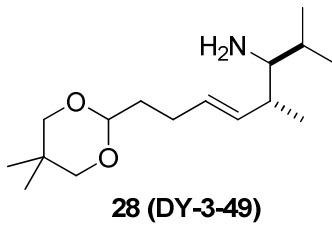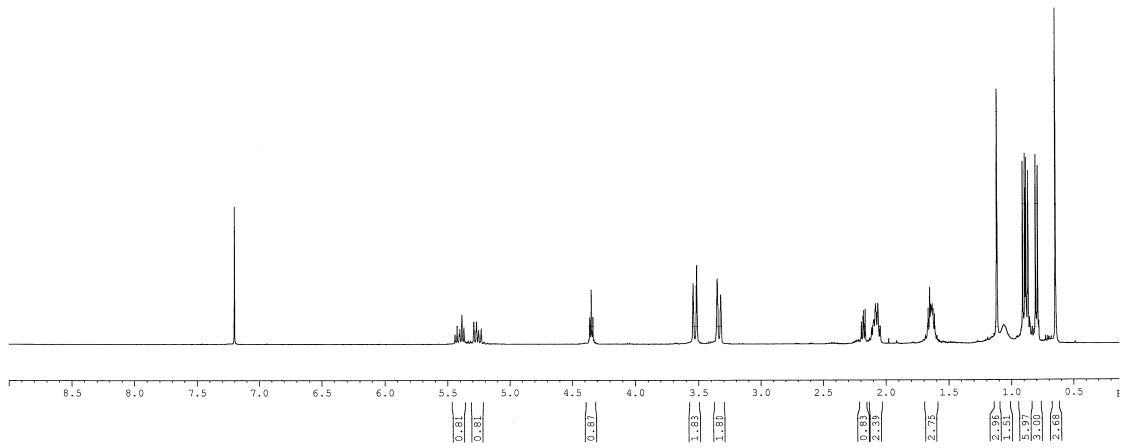

DY-3-49-4 (C)

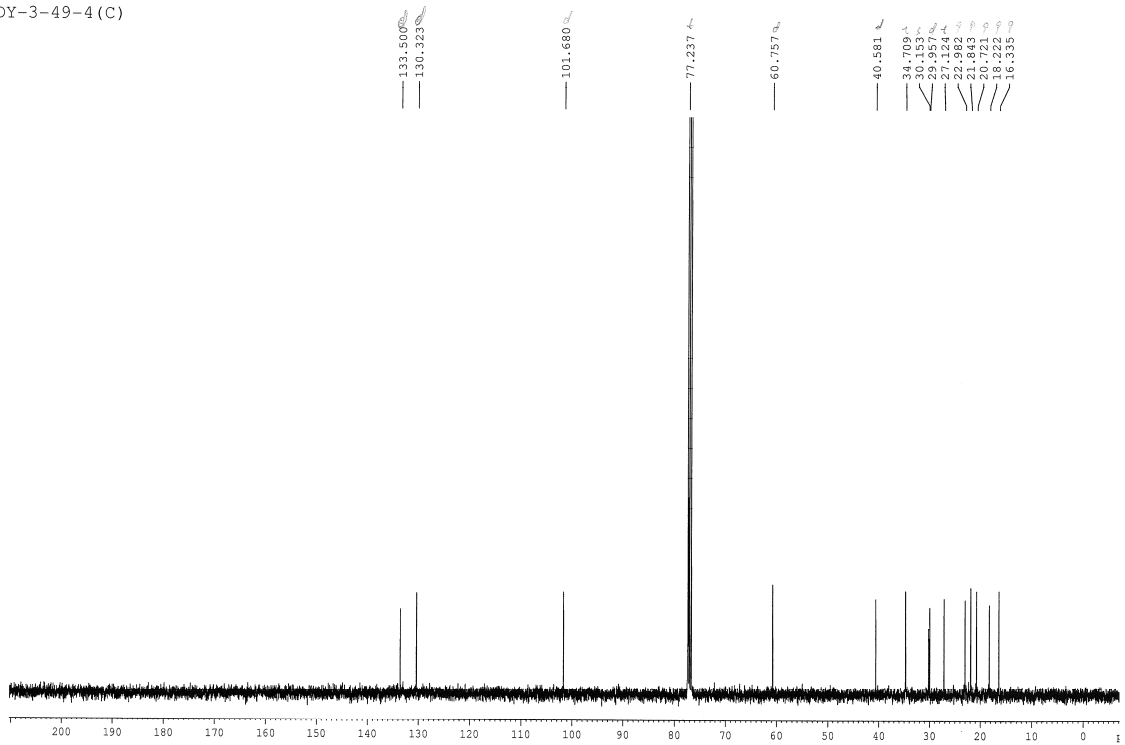



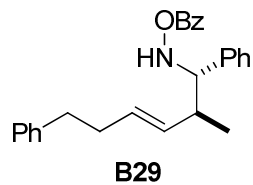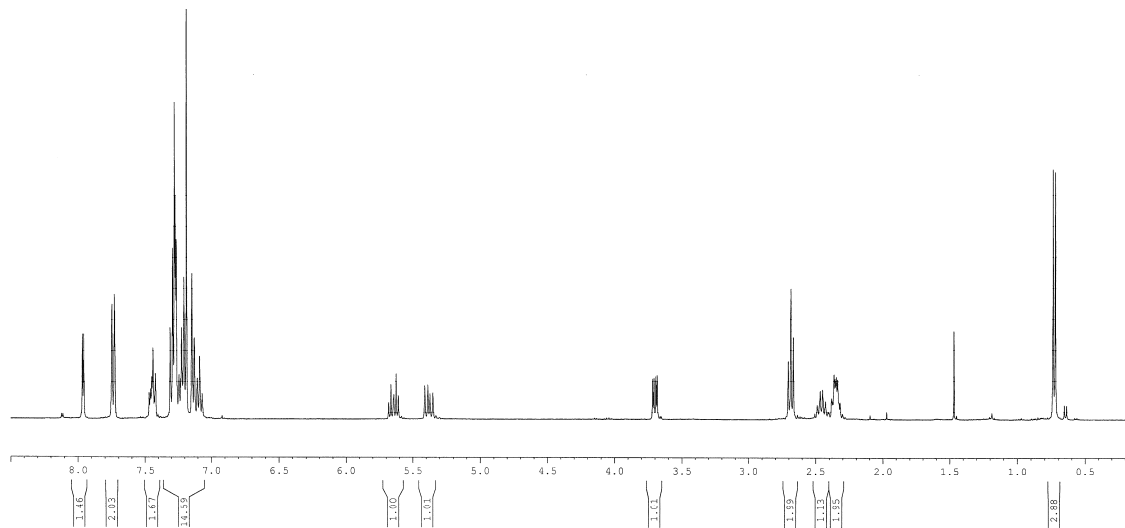

DY-3-76-3 (APT)

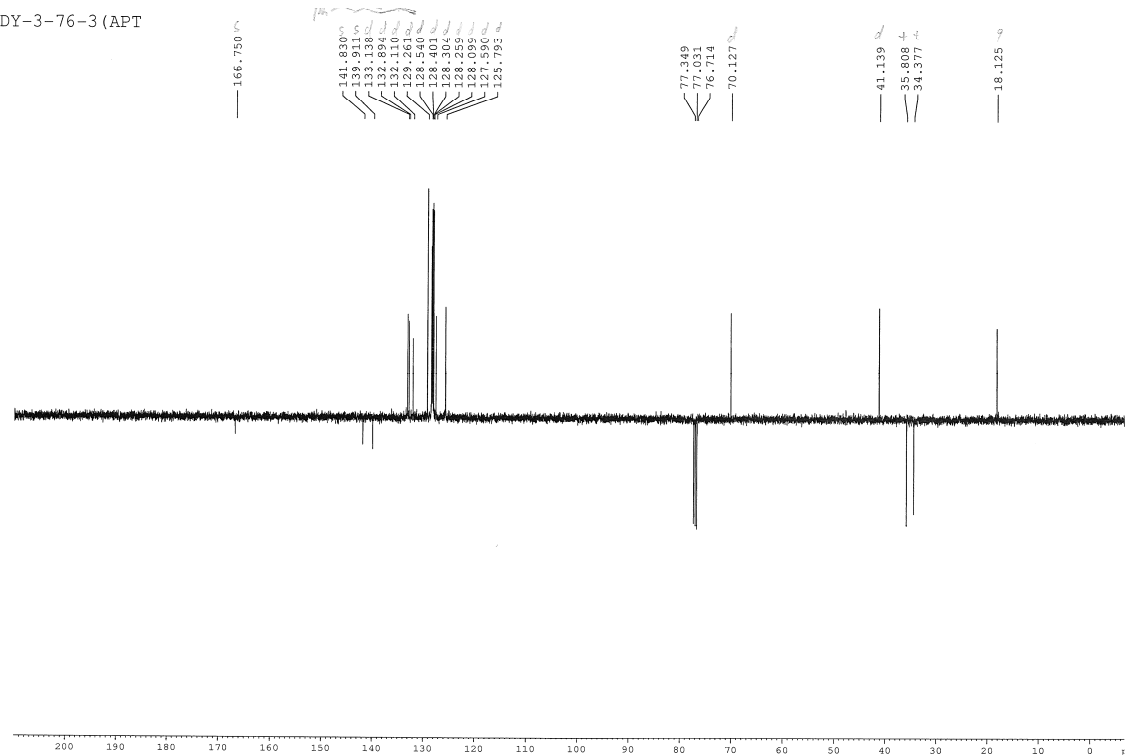

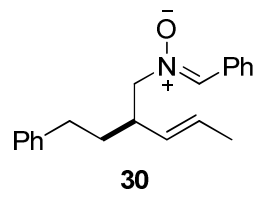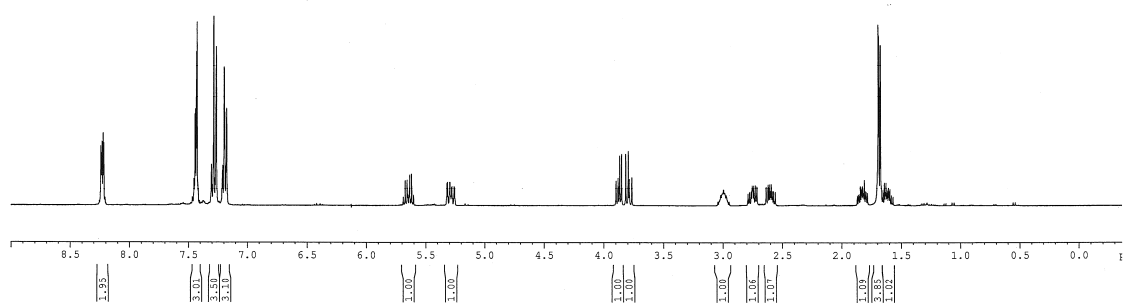

DY-3-78B-3 (AP)

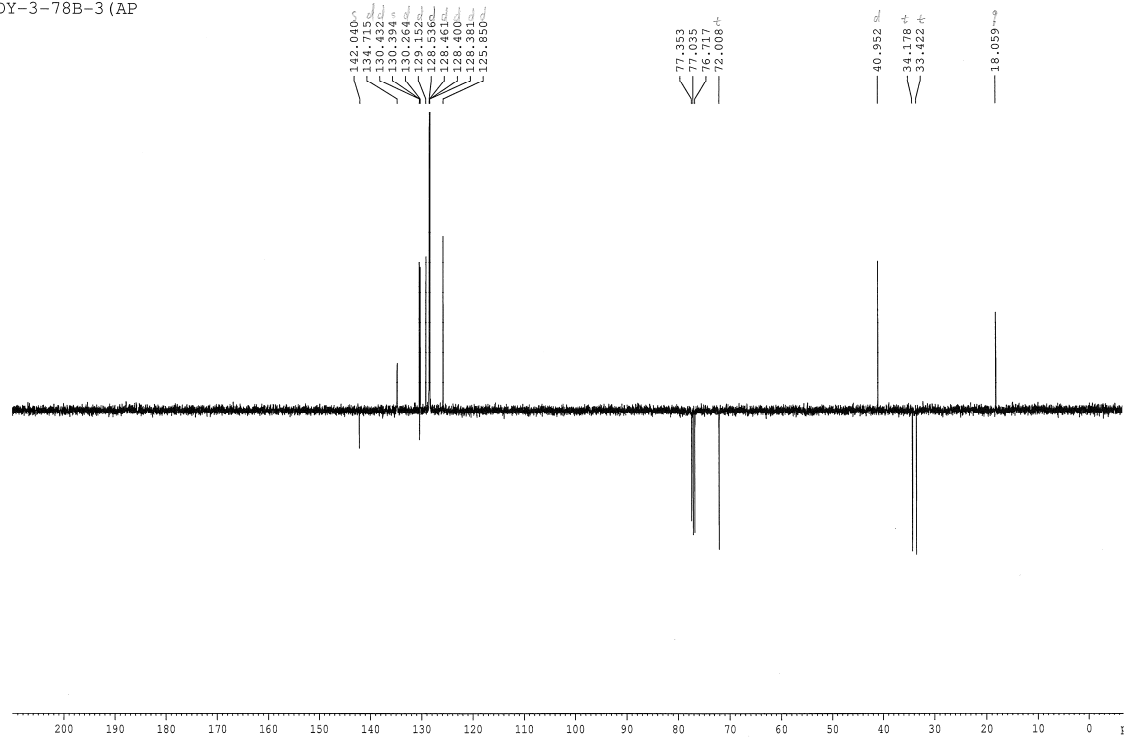

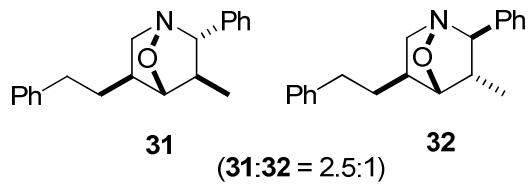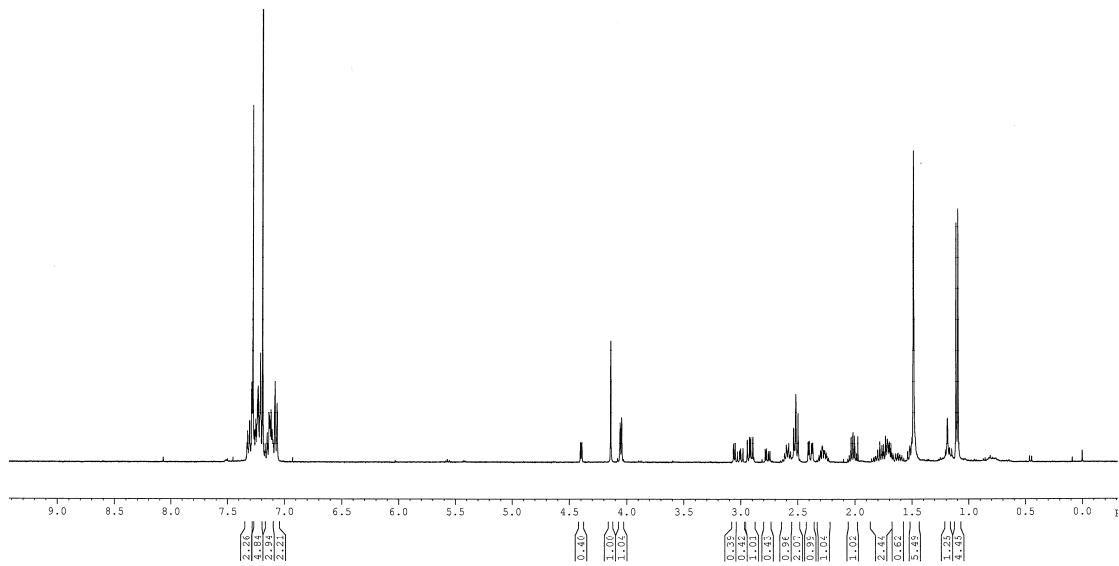

DY-2-266A-2 (COSY)

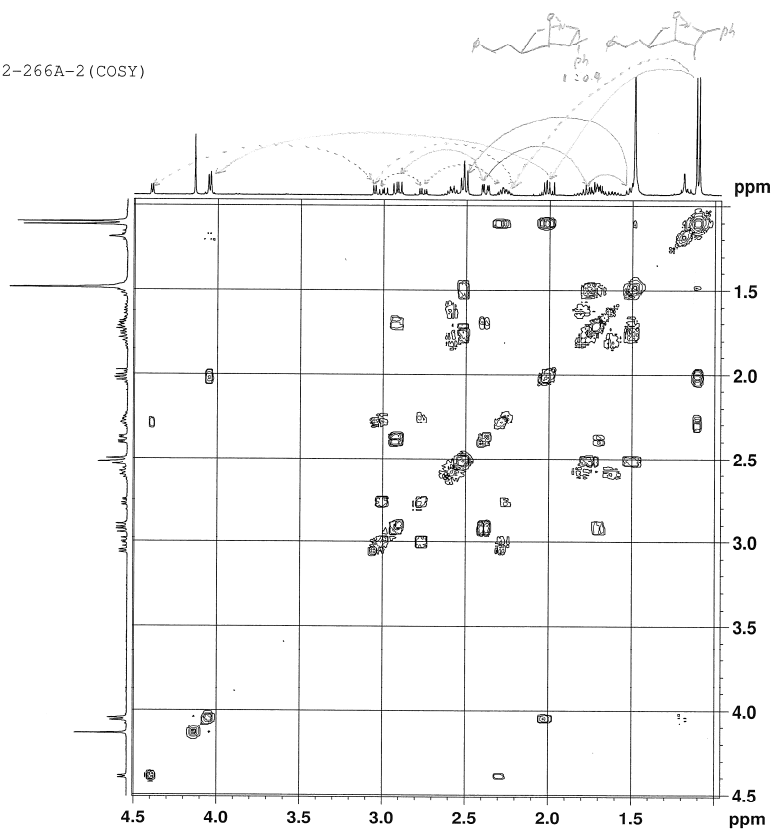

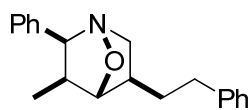

33

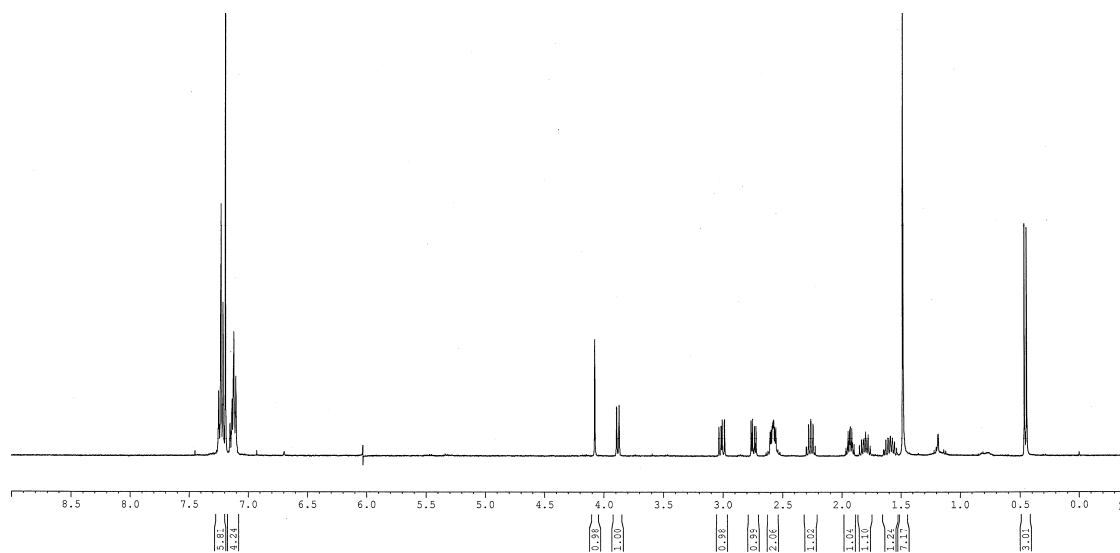

DY-3-79II-5 (C)

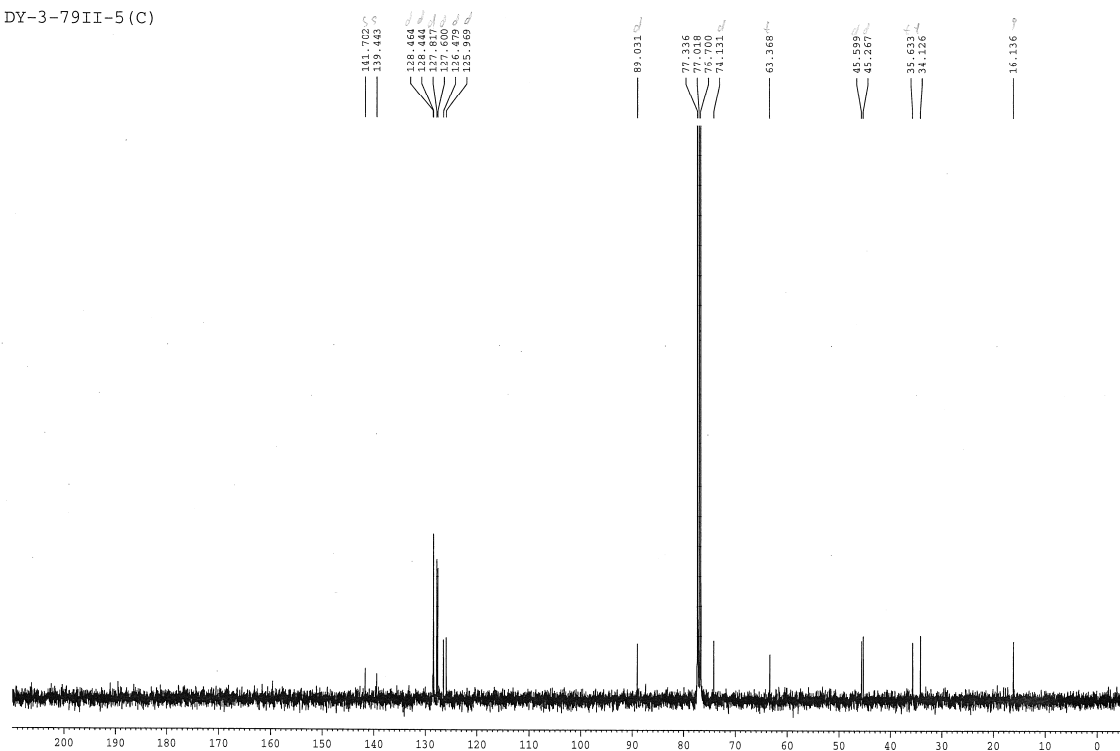

DY-2-79II-2 (COSY)

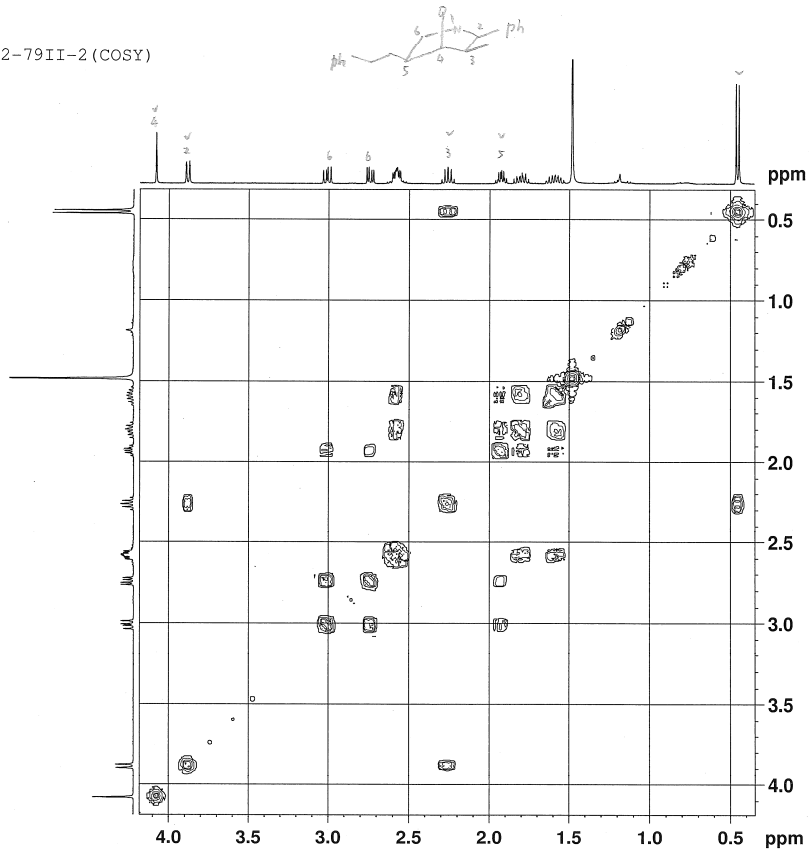

DY-3-79II-4 (A)

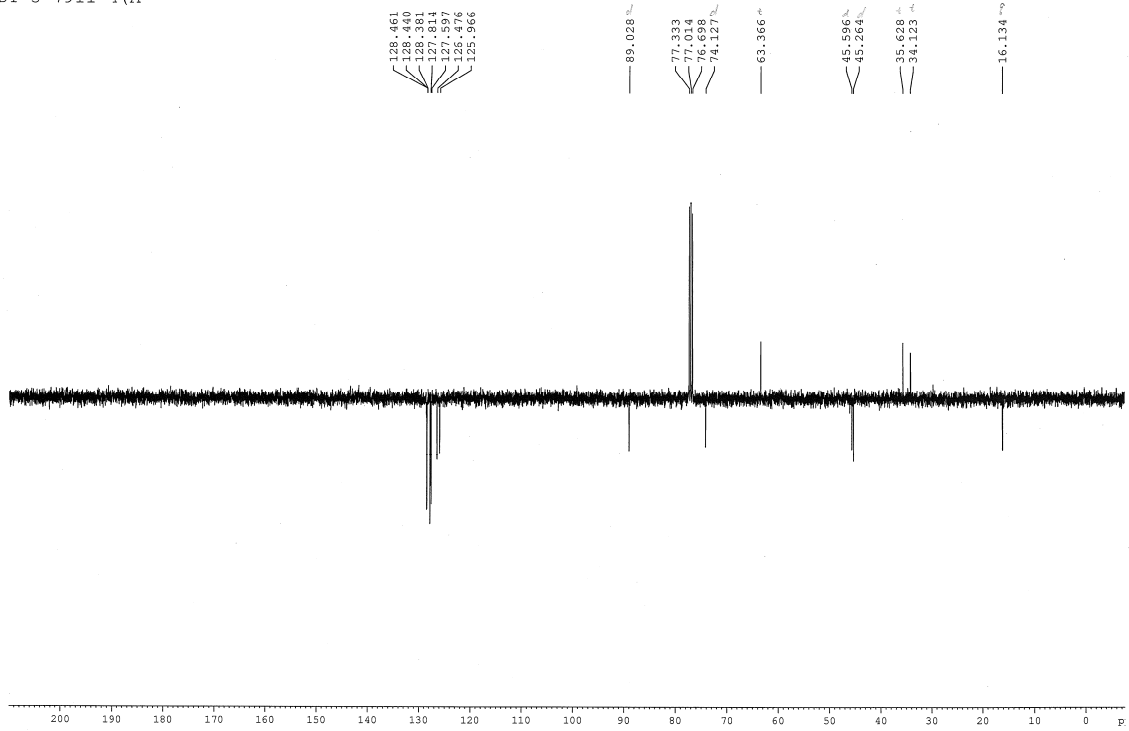

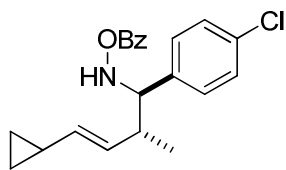

**B34 (DY-3-57)**

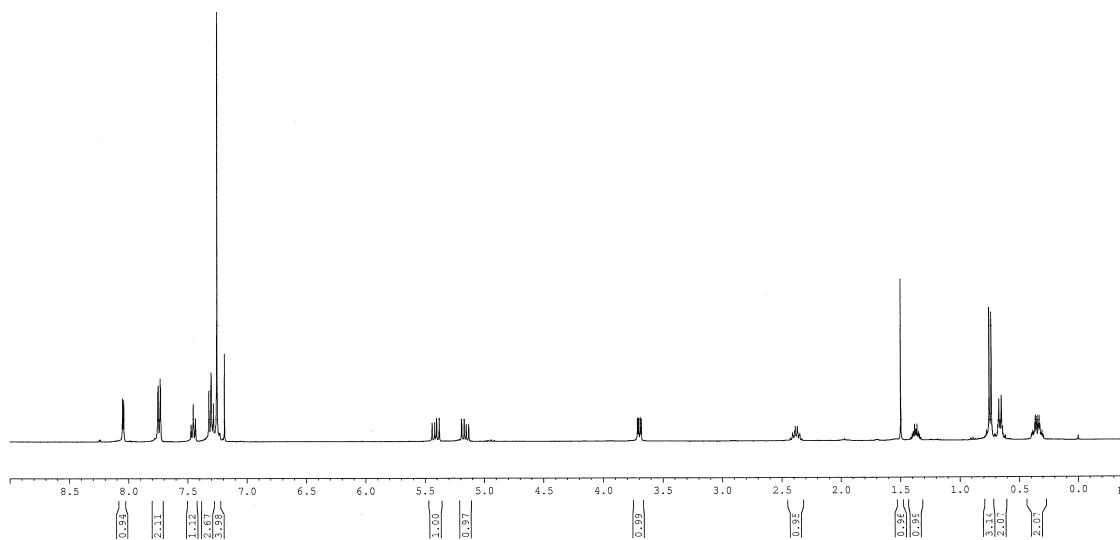

DY-3-57-7 (C)

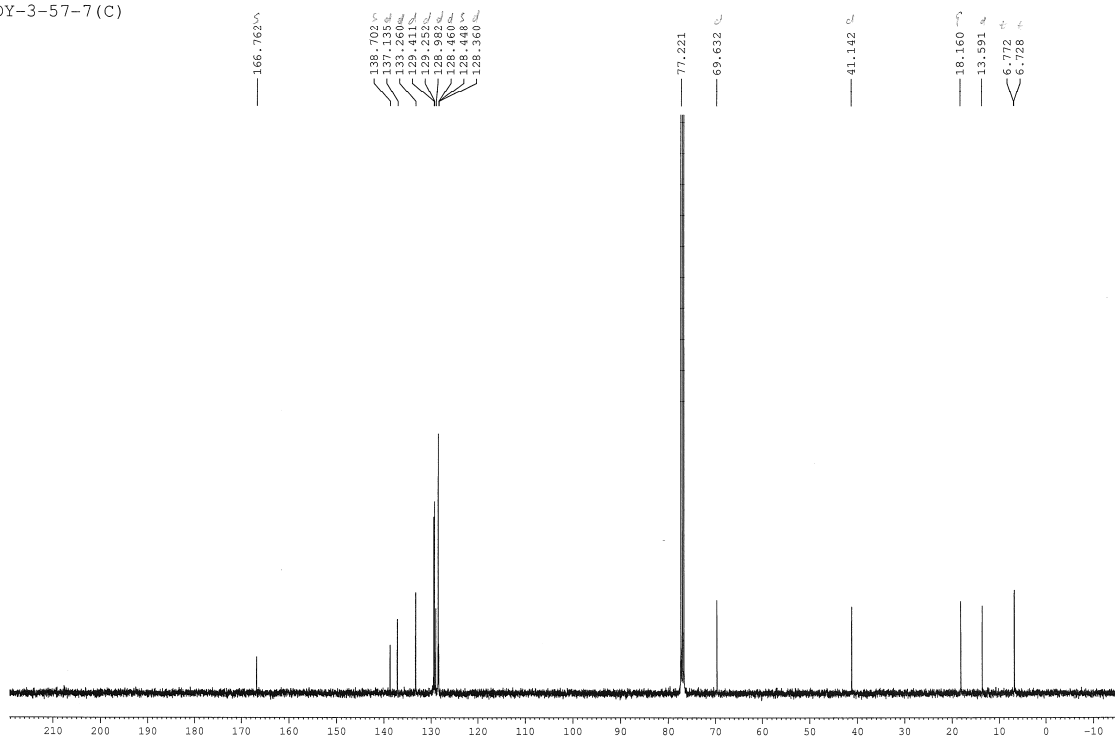

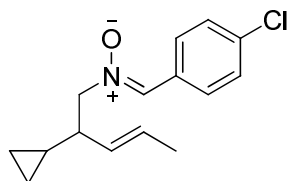

**S-1 (DY-3-61B)**

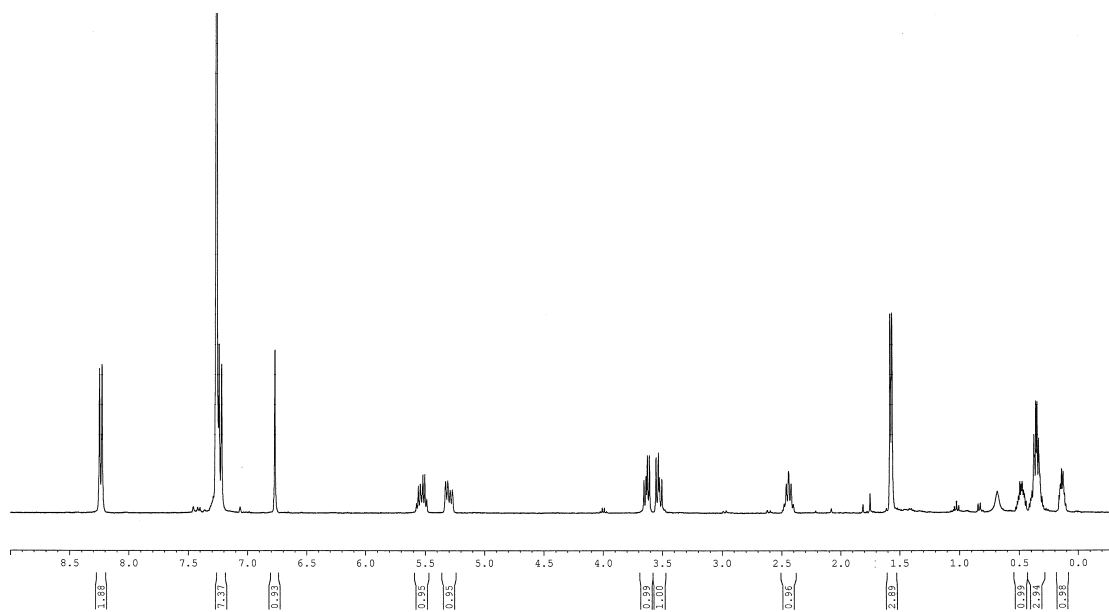

DY-3-61B-3 (AP)

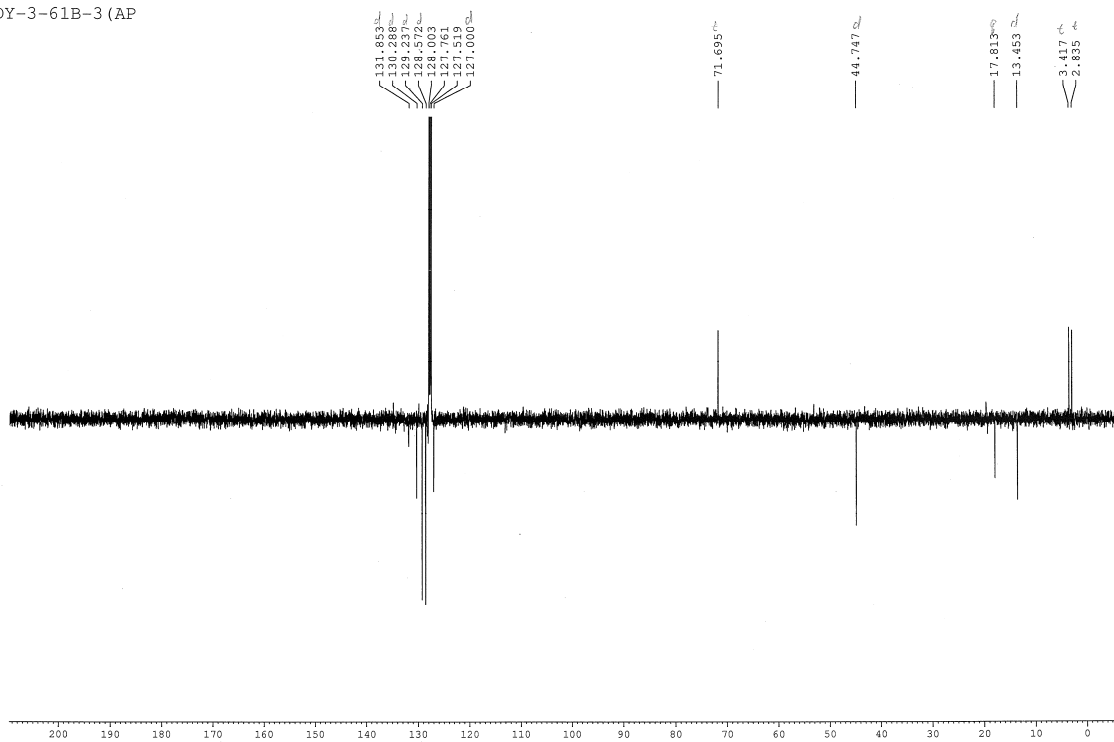

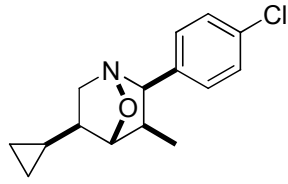

35 (DY-3-63)

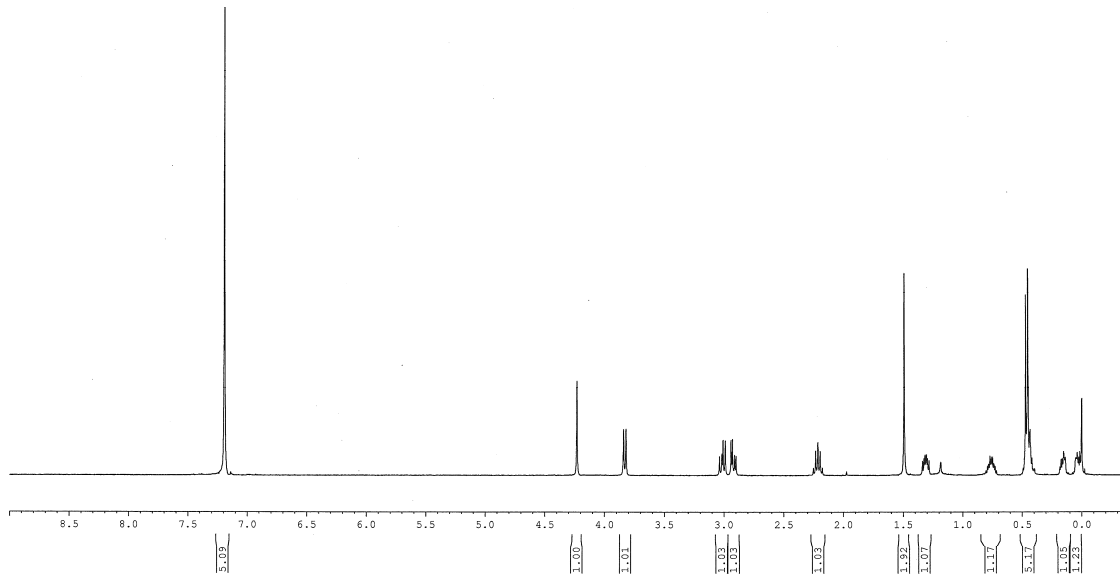

DY-3-63-4 (C)

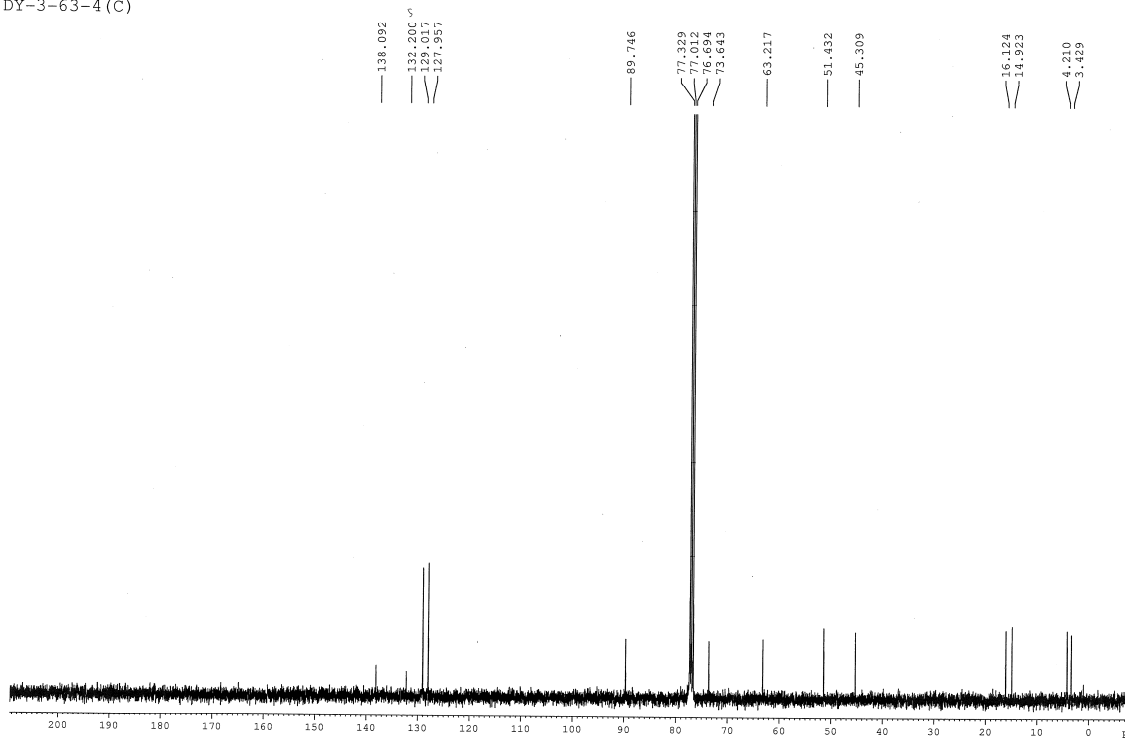



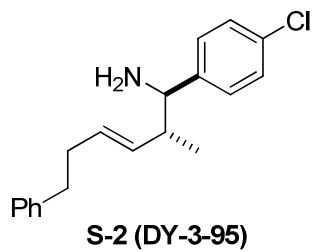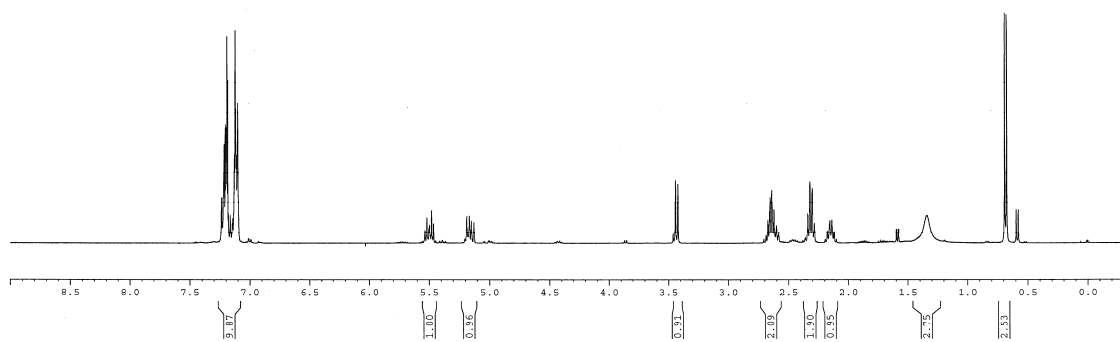

DY-3-95-4 (C)

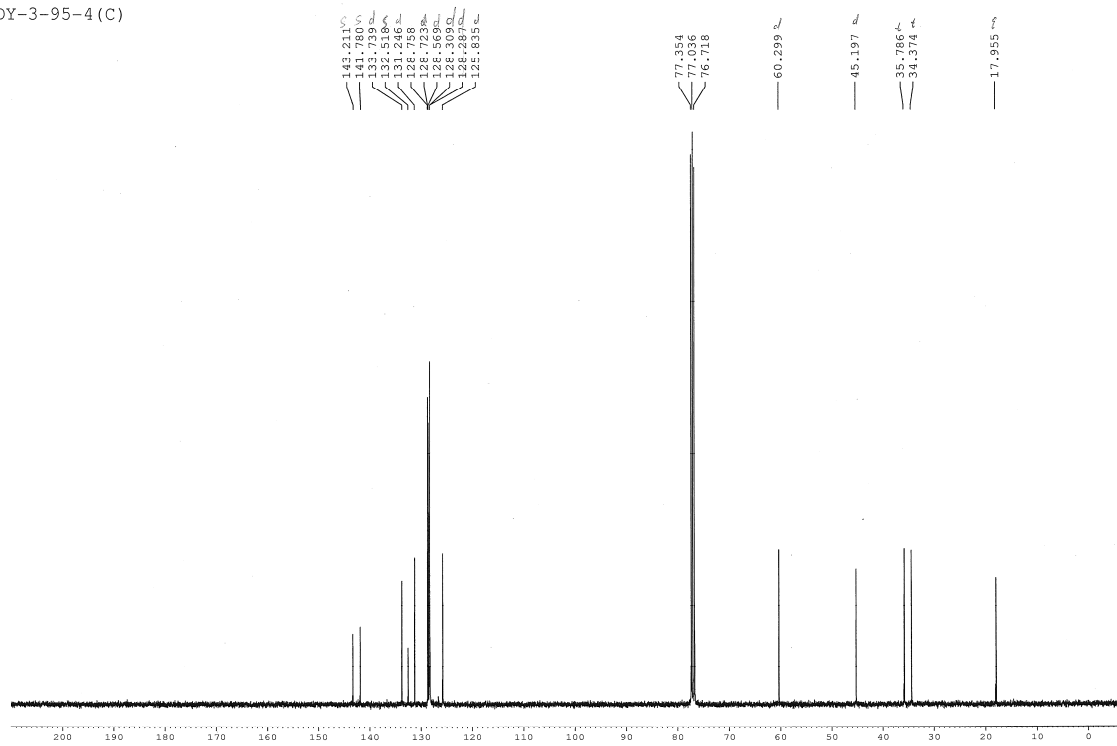

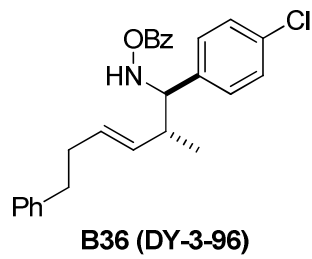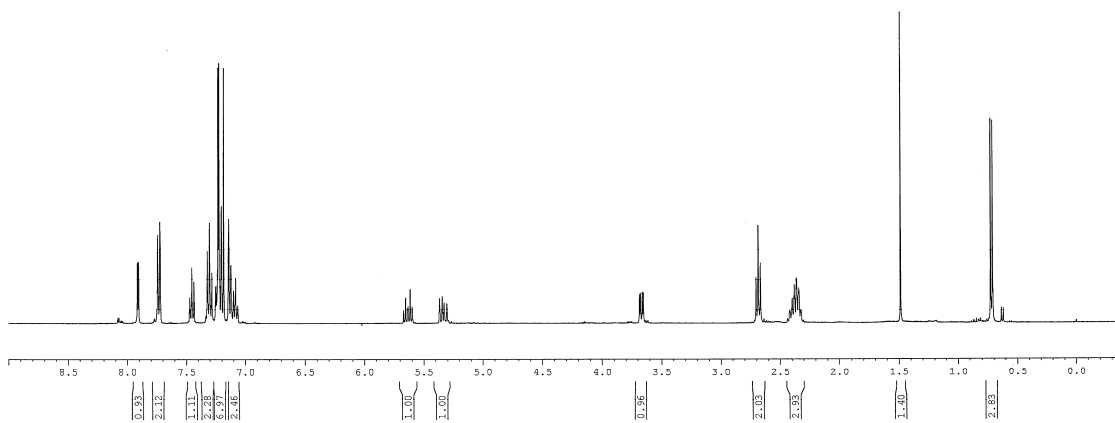

DY-3-96-4 (C)

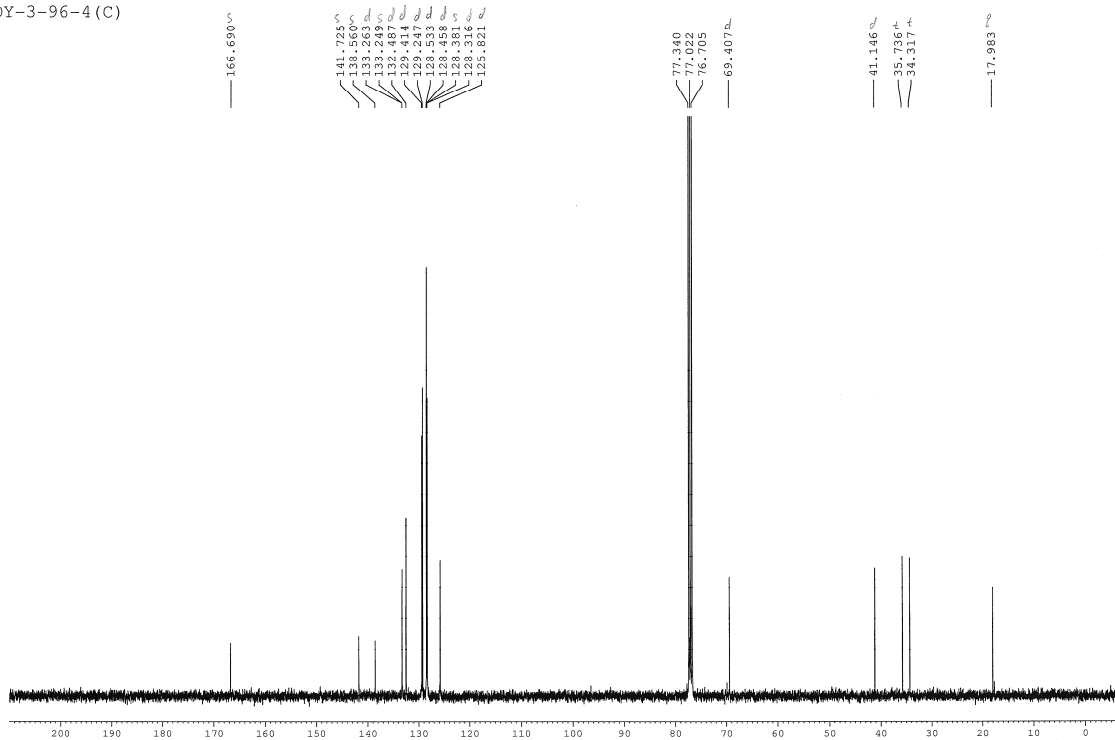

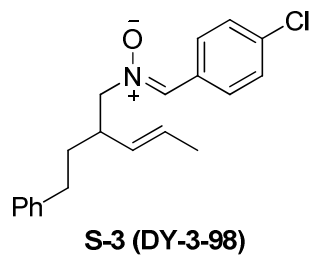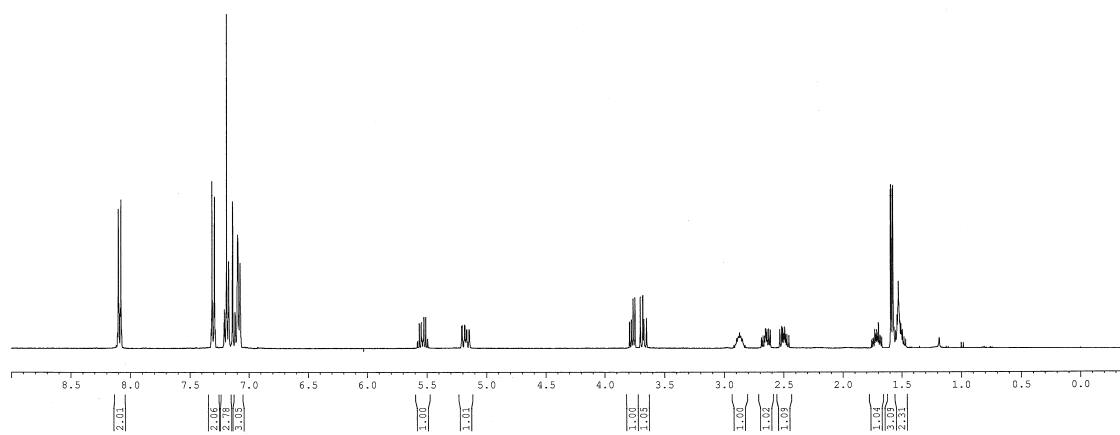

DY-3-98-4(C)

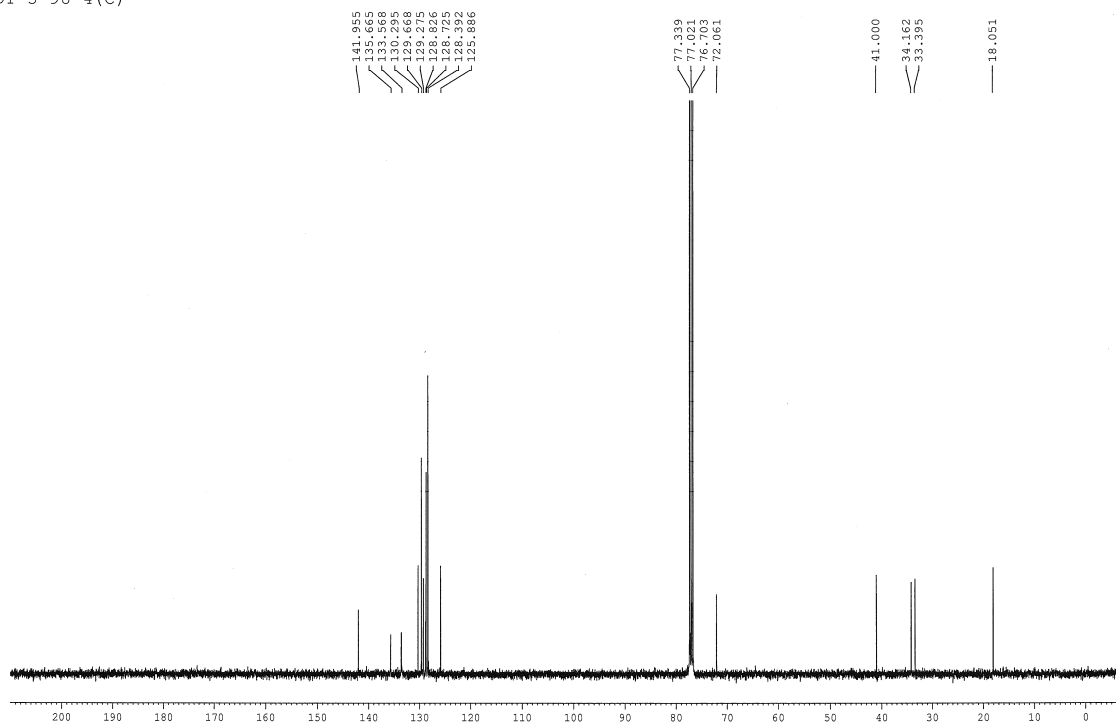

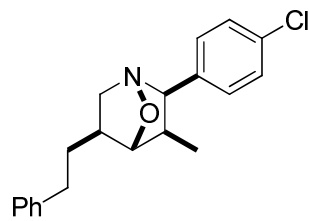

37 (DY-3-99)

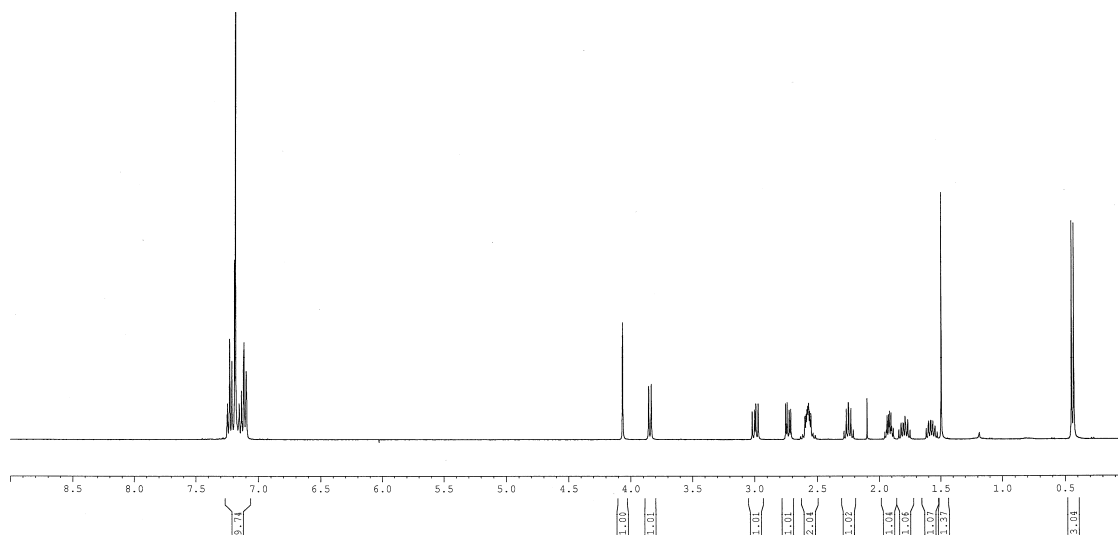

DY-3-99-4 (C)

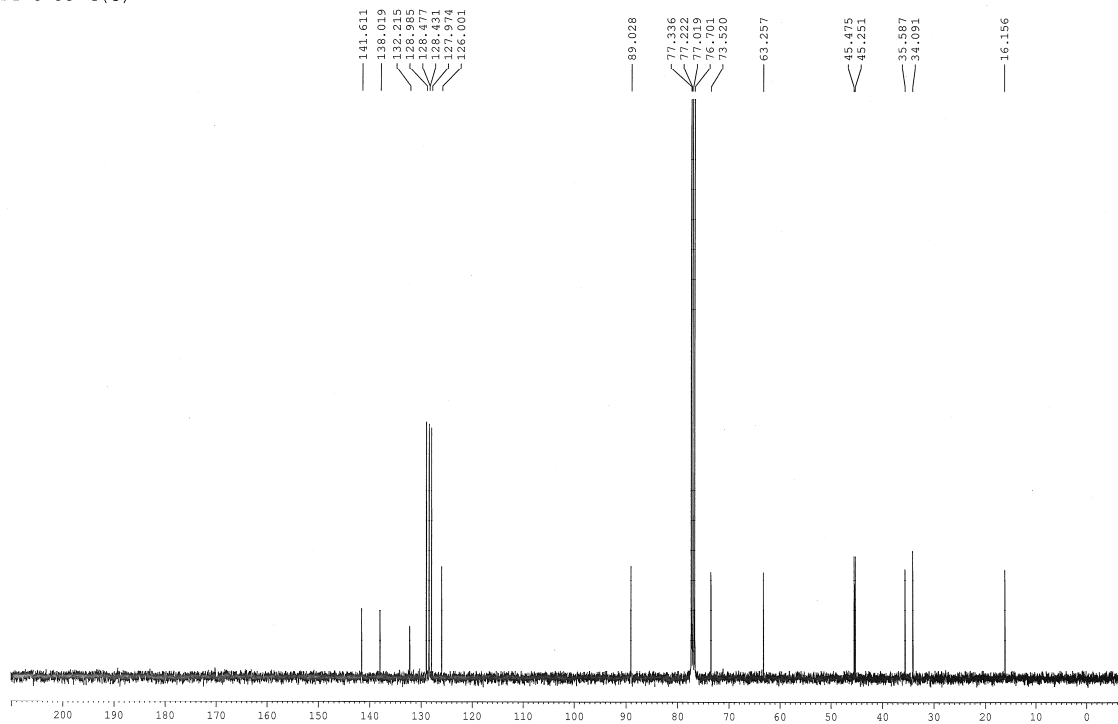

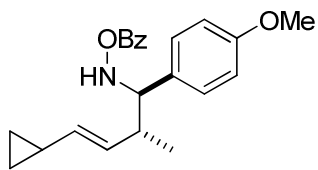

**B38 (DY-3-67)**

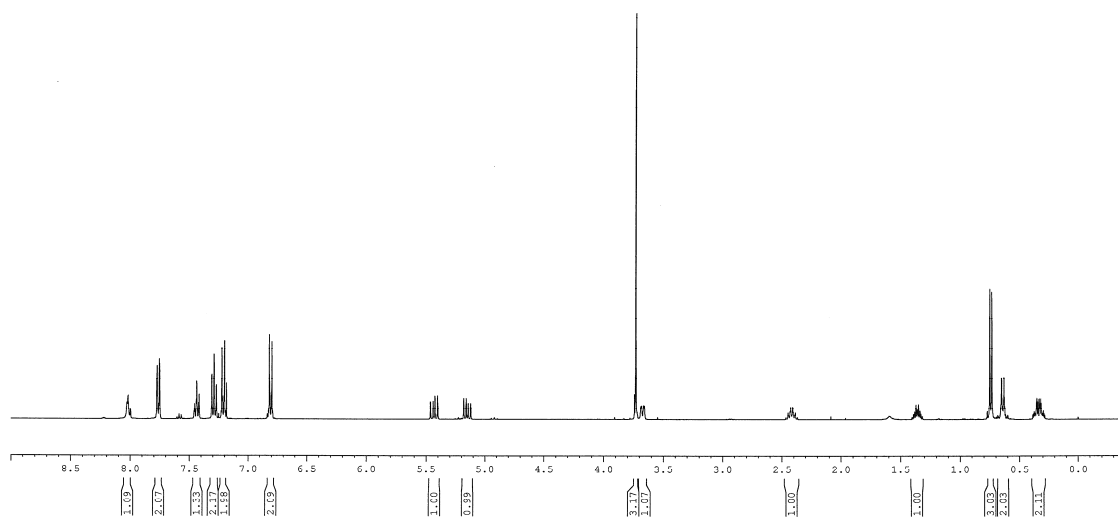

DY-3-67-4 (C)

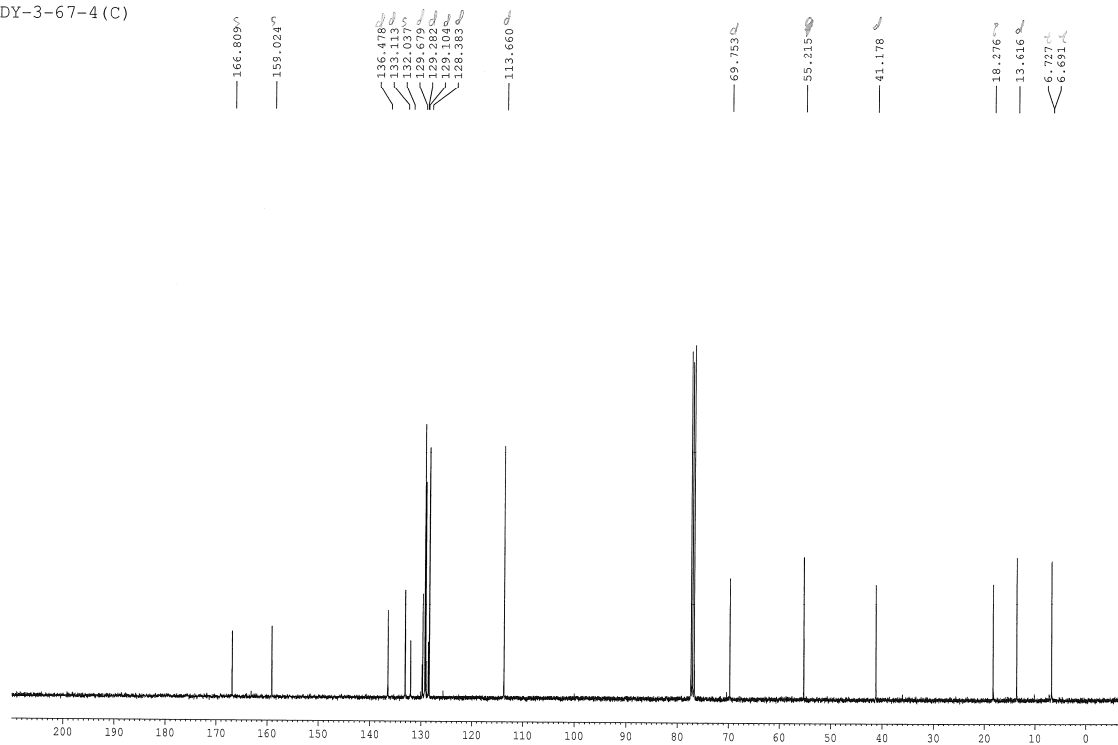

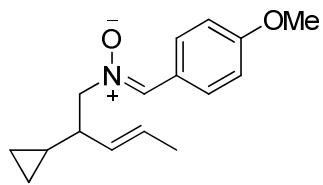

**S-4 (DY-3-69)**

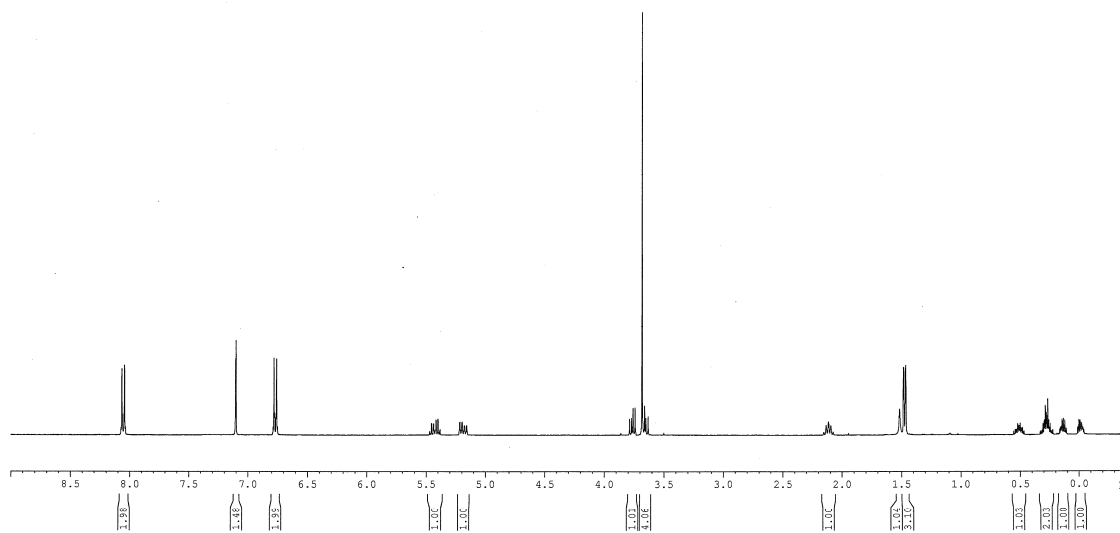

DY-3-70-4 (C)

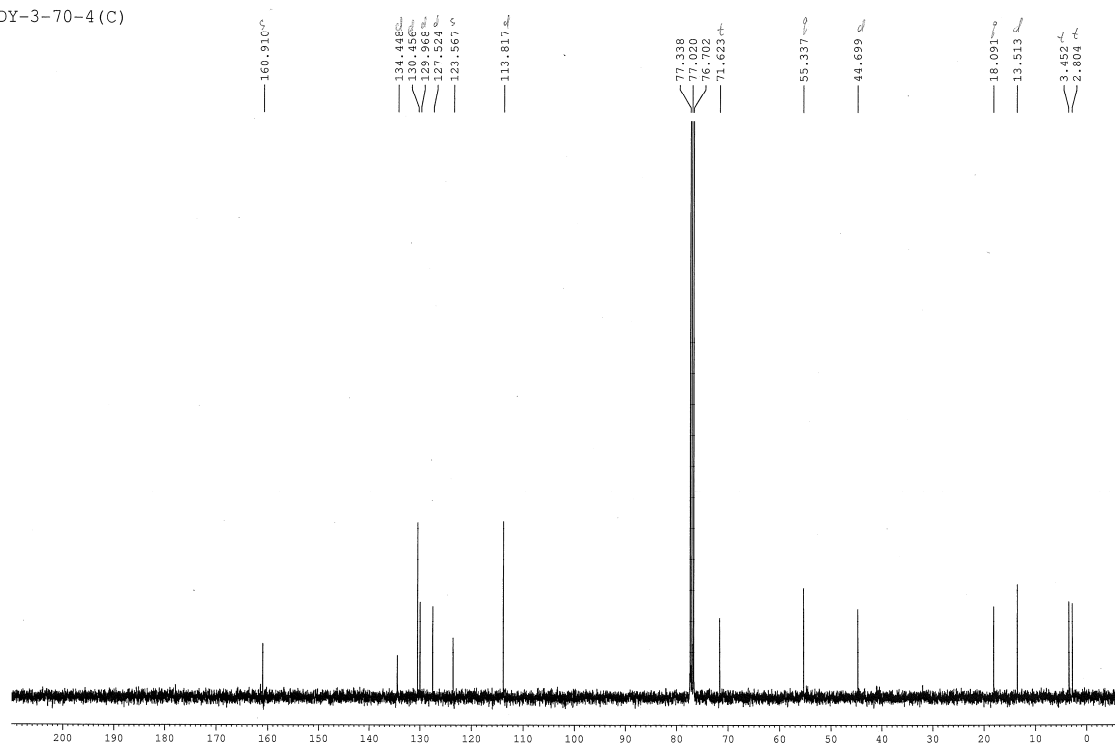

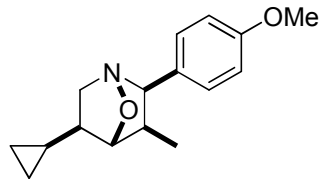

39 (DY-3-71)

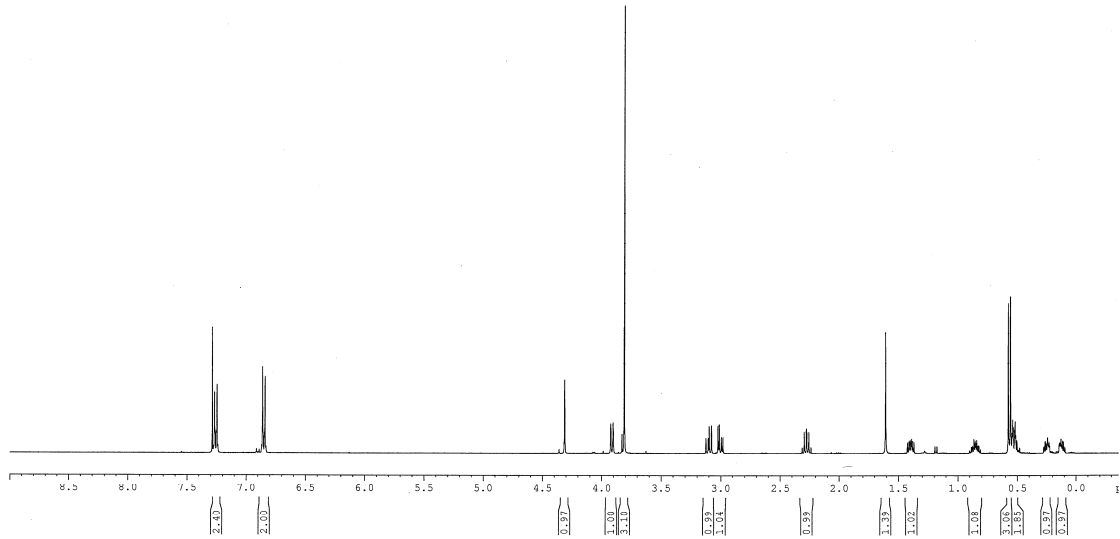

DY-3-71-4 (C)

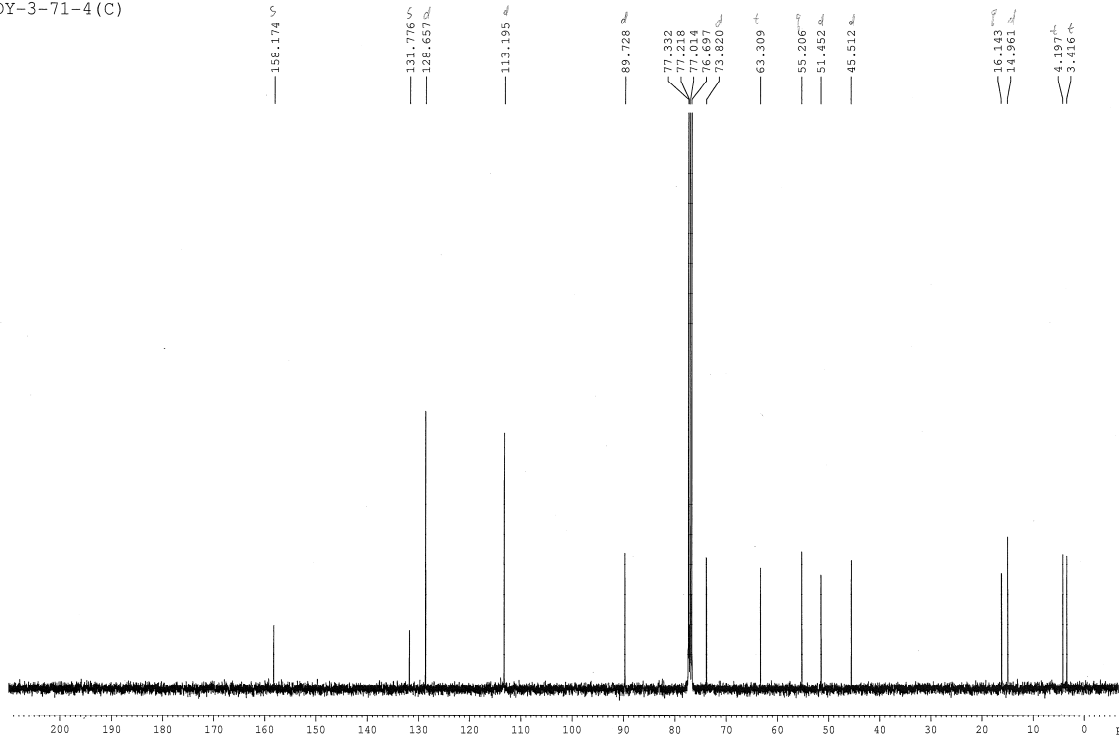

DY-3-71-2 (COSY)

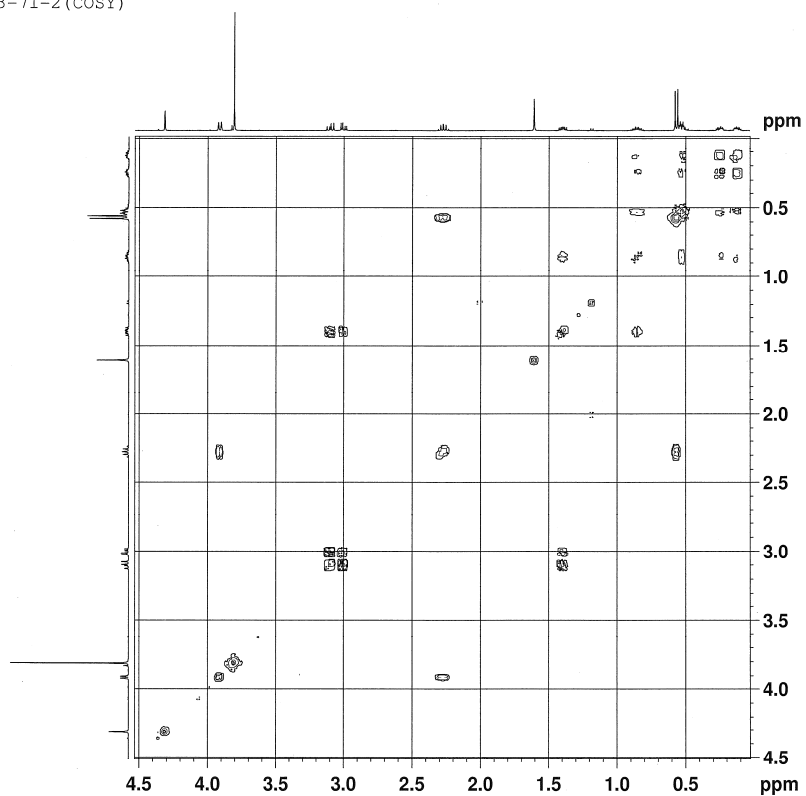

DY-3-71-3 (APT)

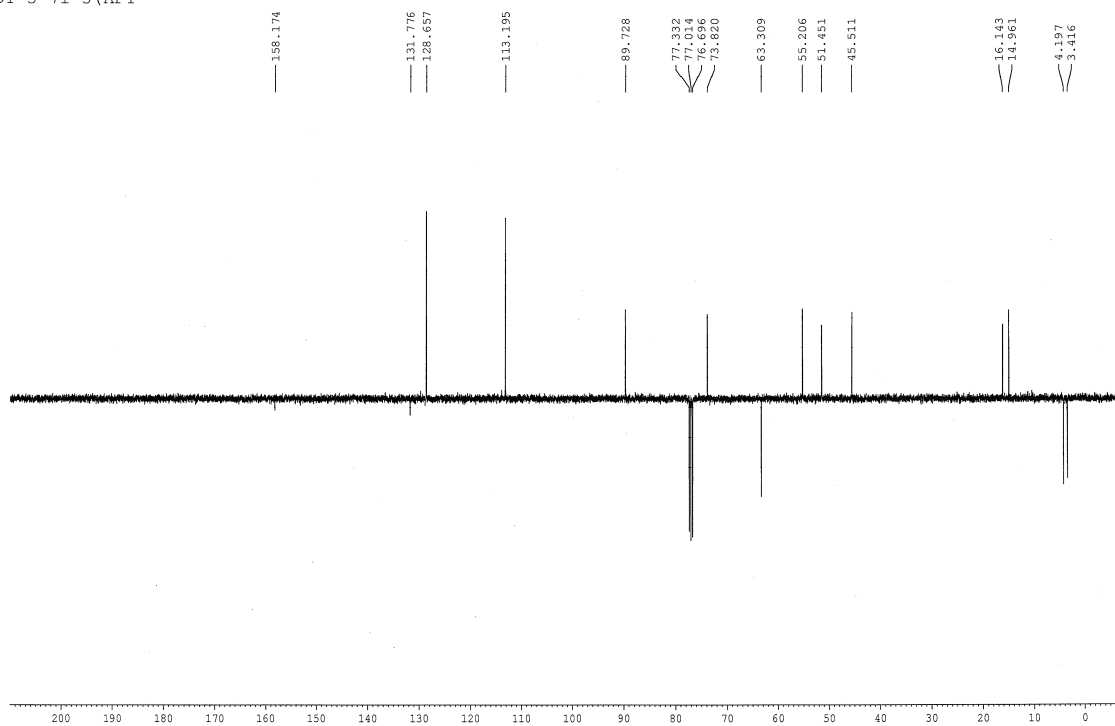



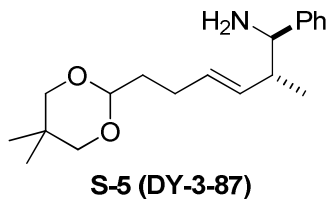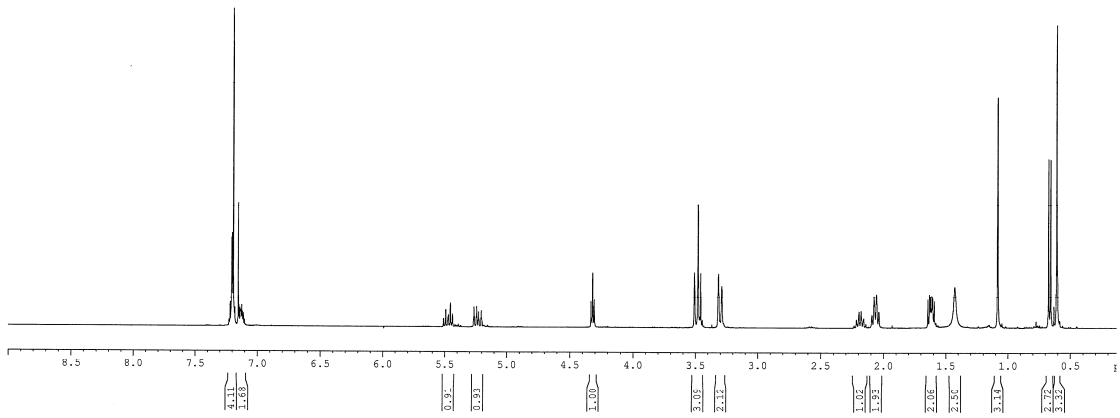

DY-3-87-4 (C)

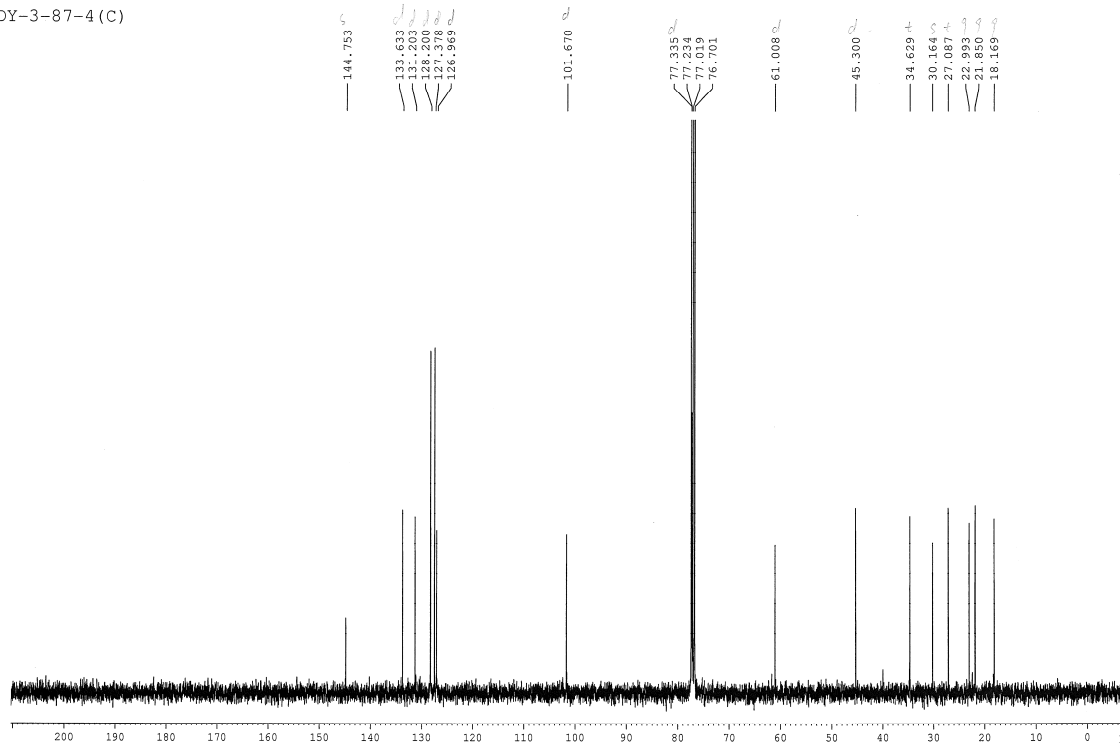

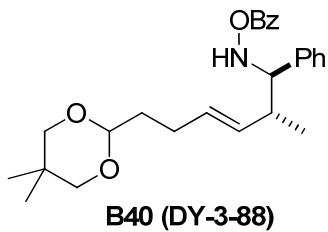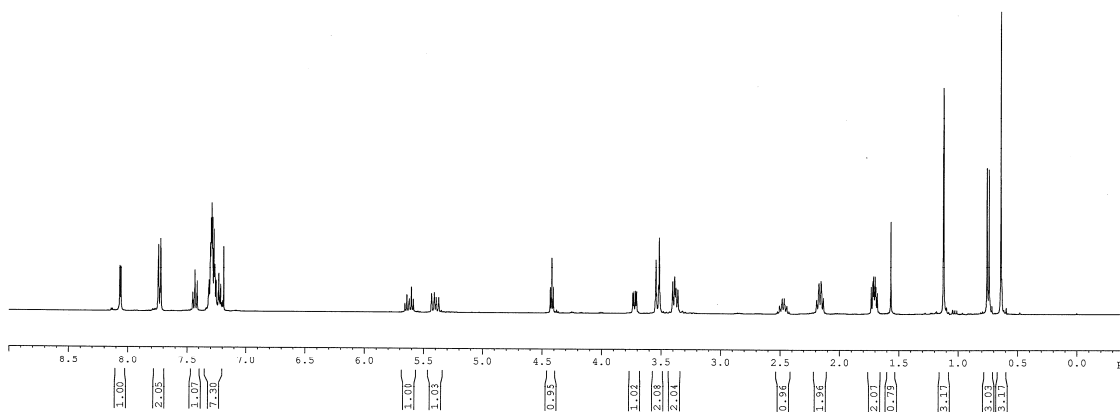

DY-3-88-6 (C)

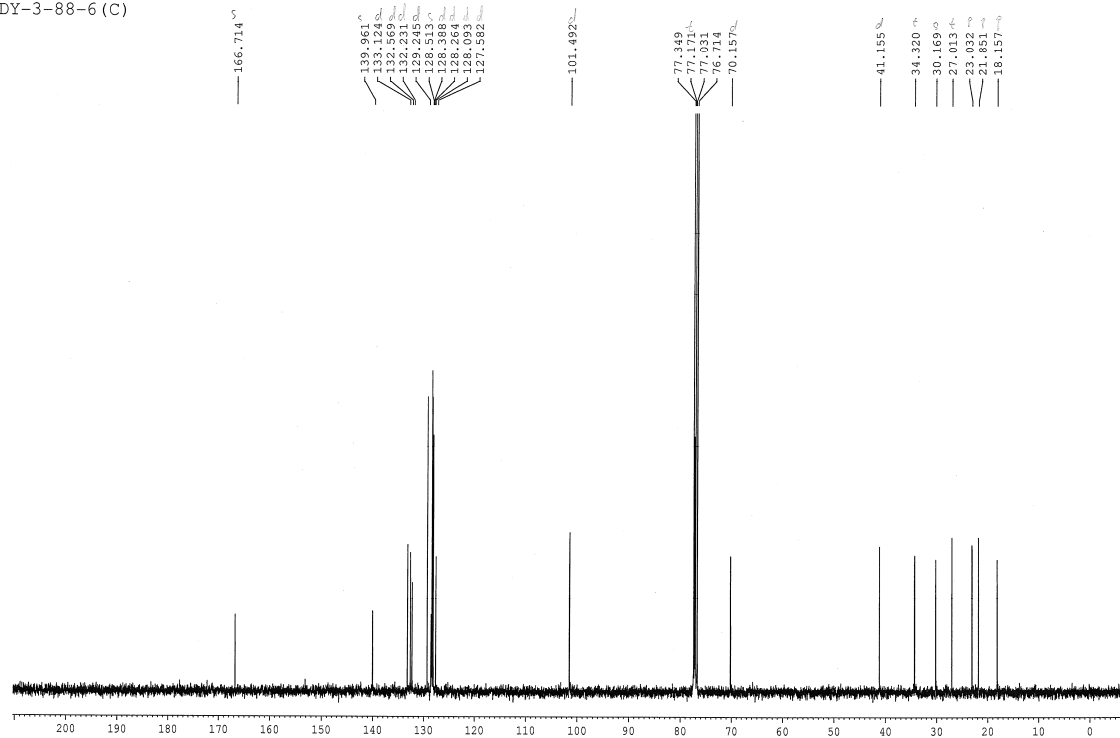

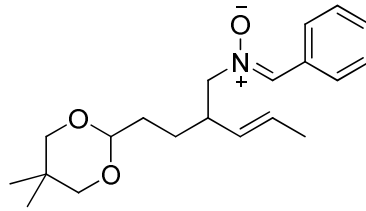

S-6 (DY-3-89)

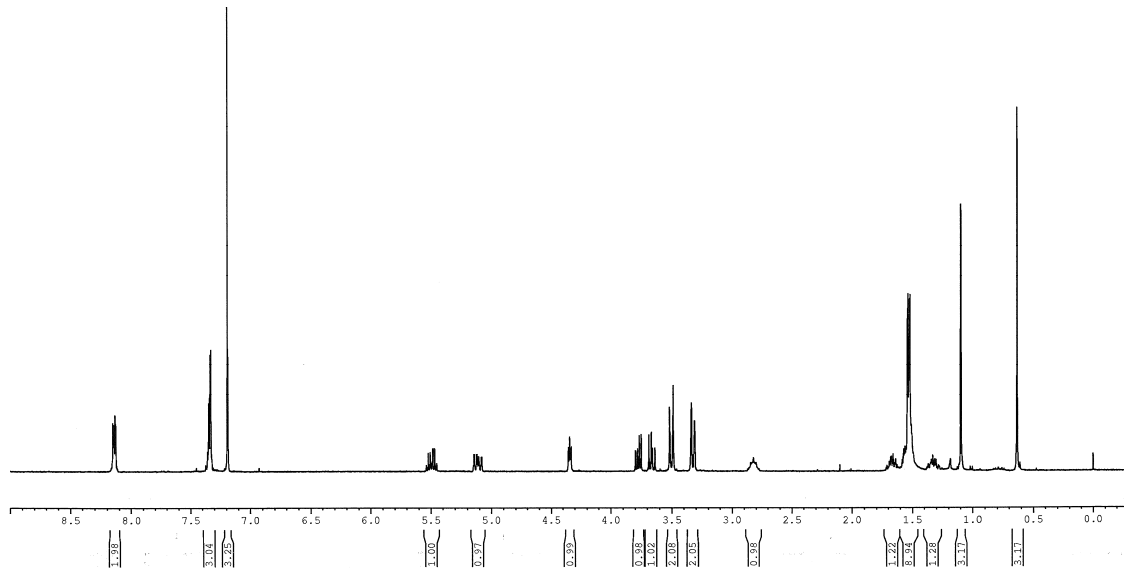

DY-3-89-3 (APT)

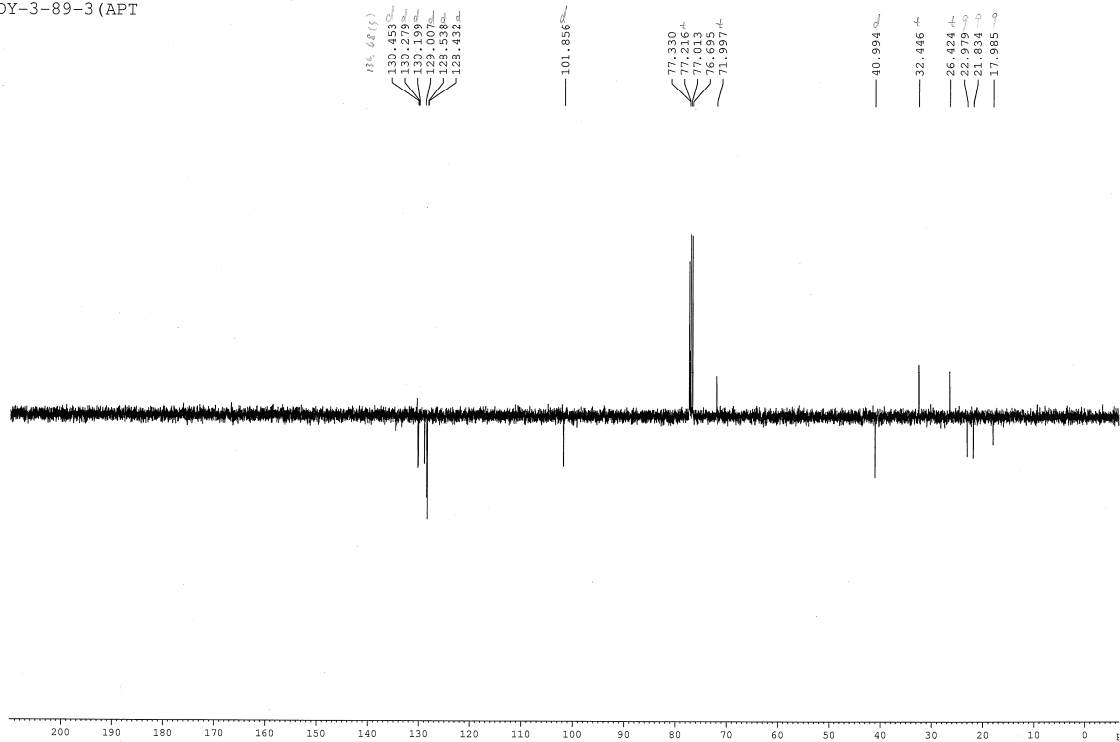

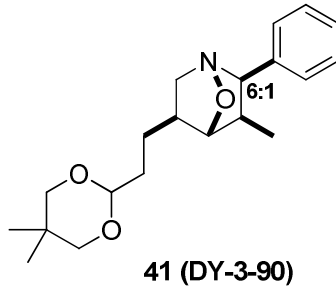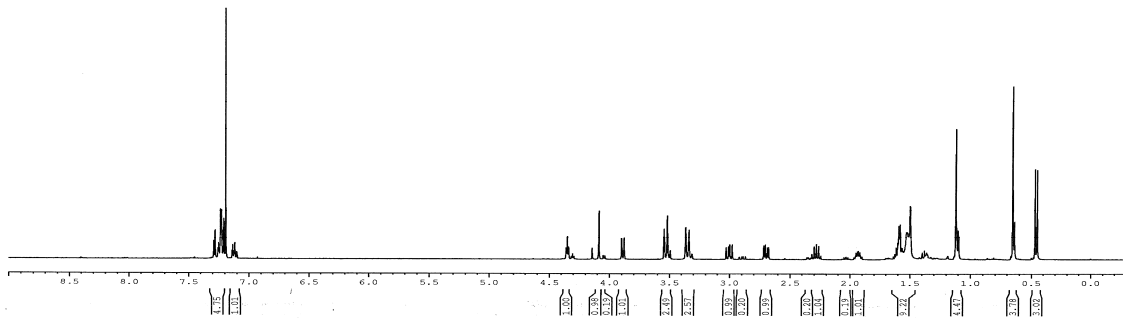

DY-3-90-20 (APT)  
C13APT

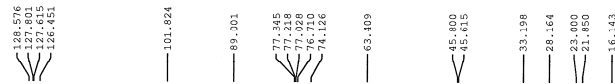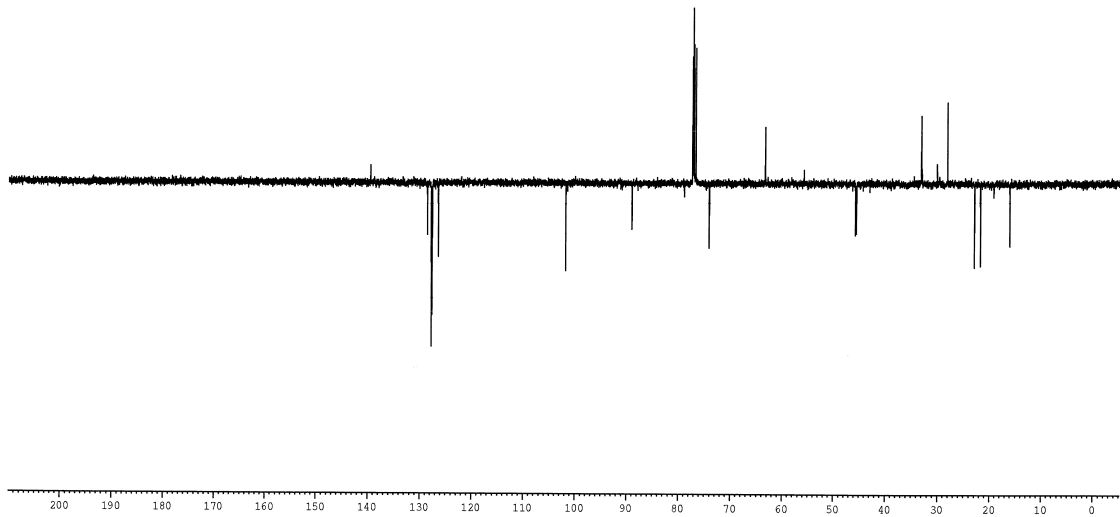

DY-3-90-20 (COSY)  
COSYGPSW COSYGPSW

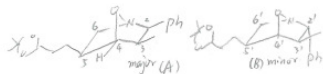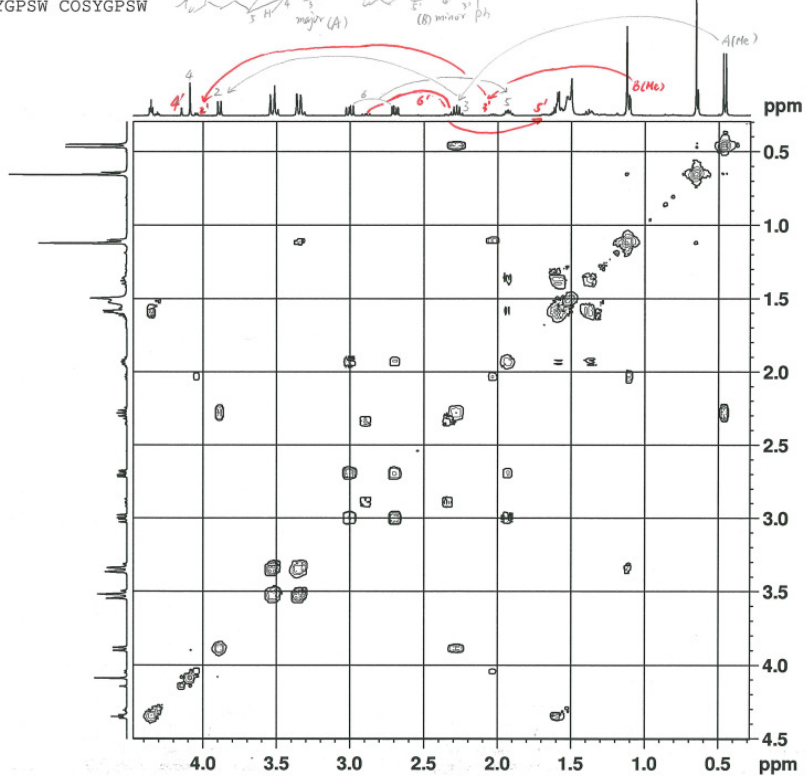

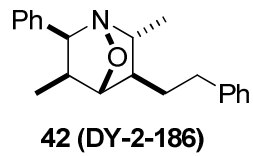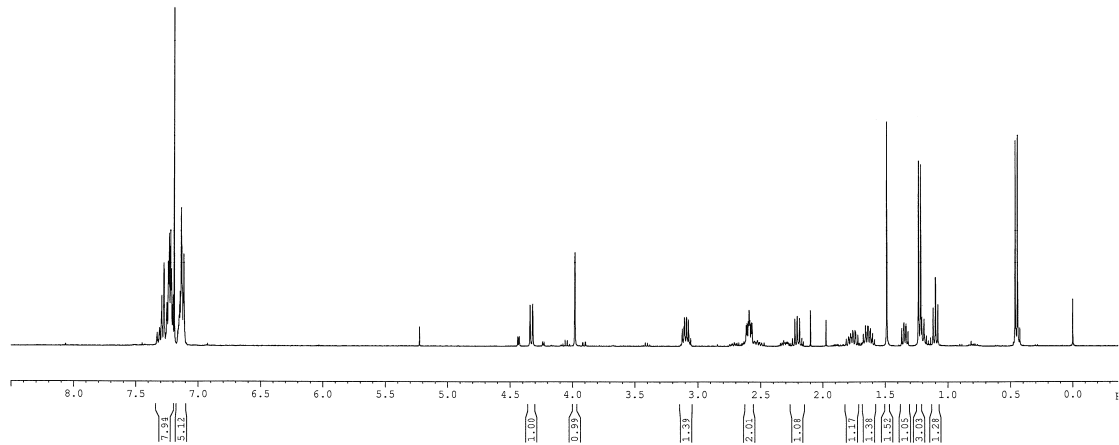

DY-2-186B-21 (

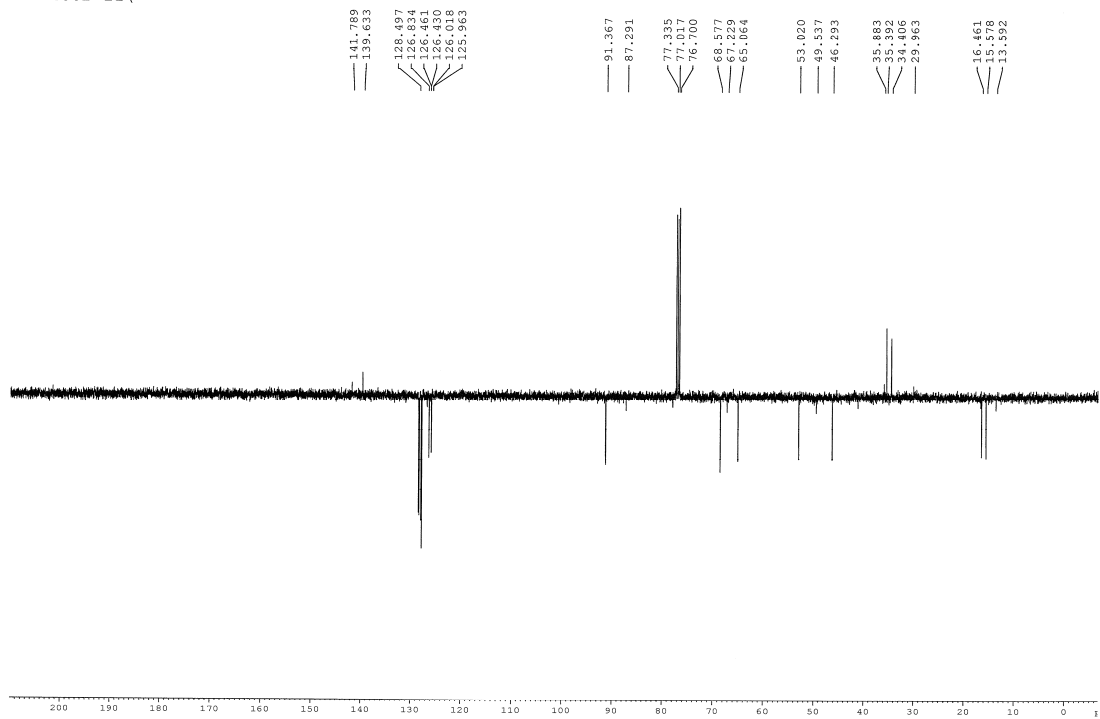

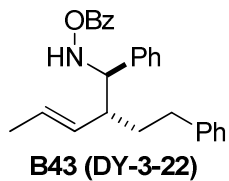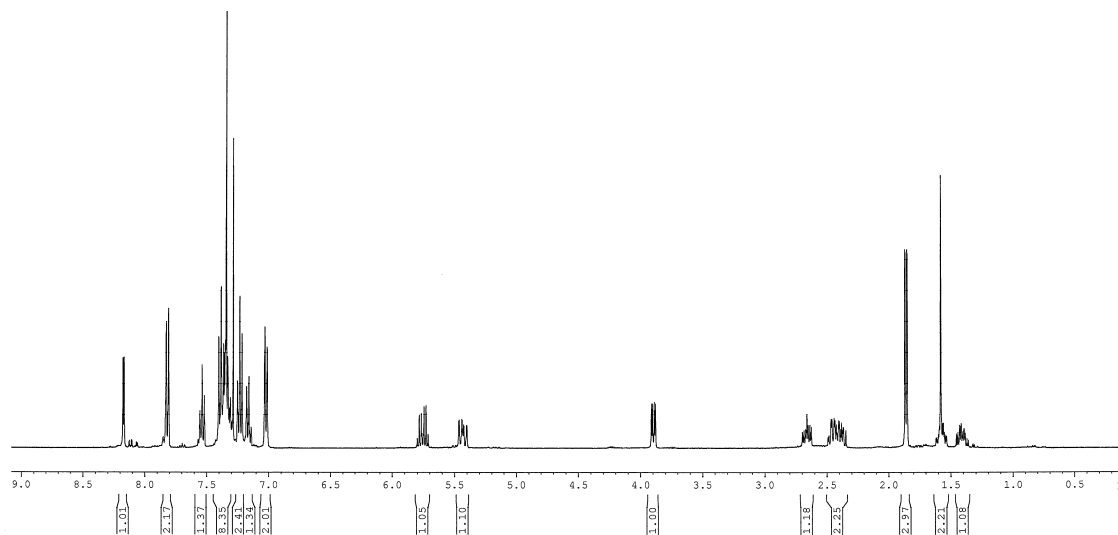

DY-3-22-3 (APT)

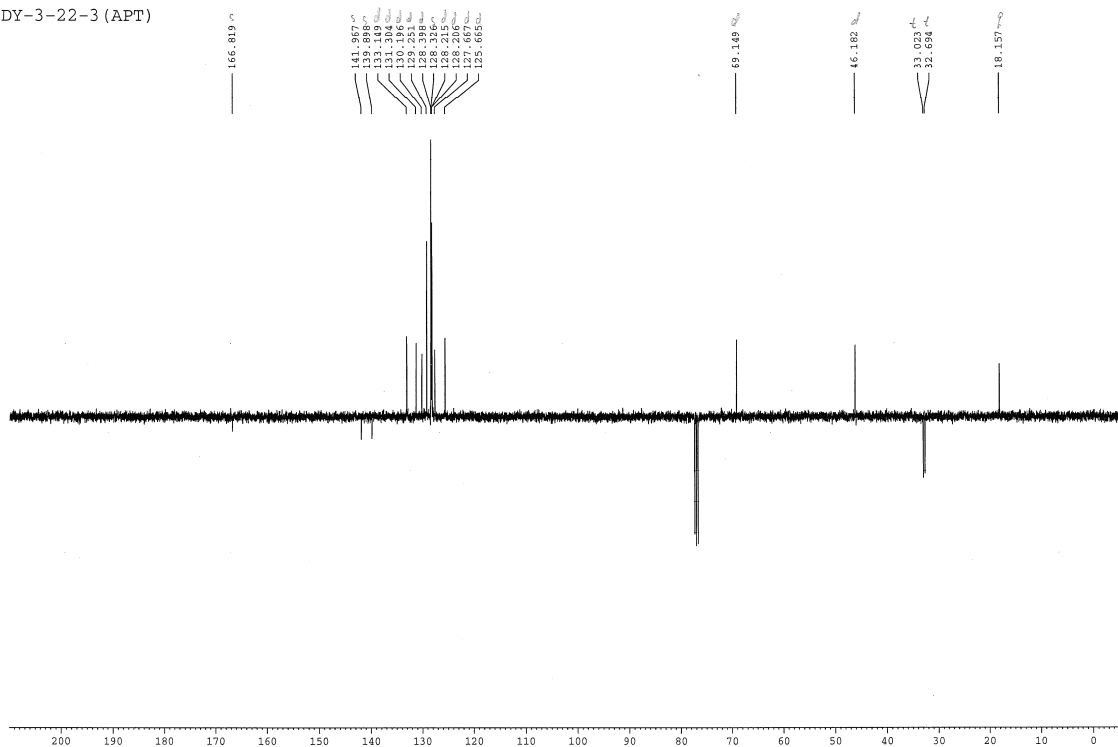

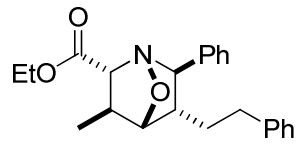

44 (DY-3-25)

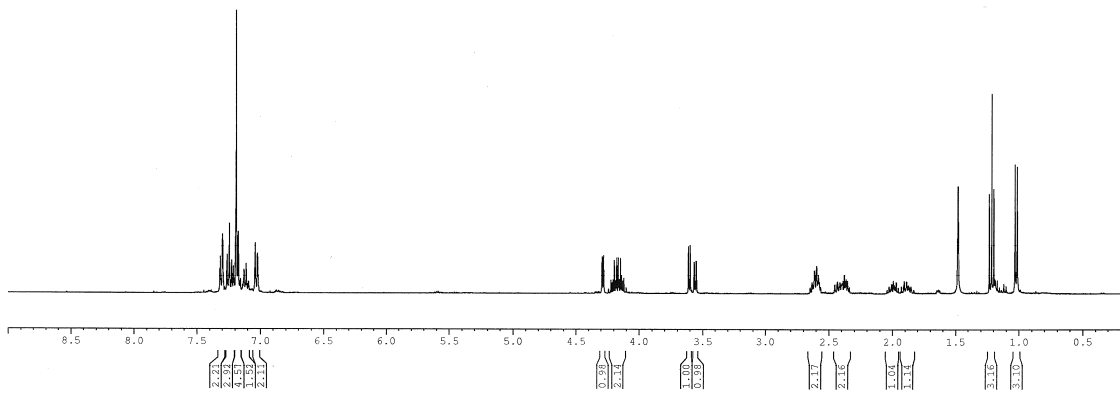

DY-3-25-4 (C)

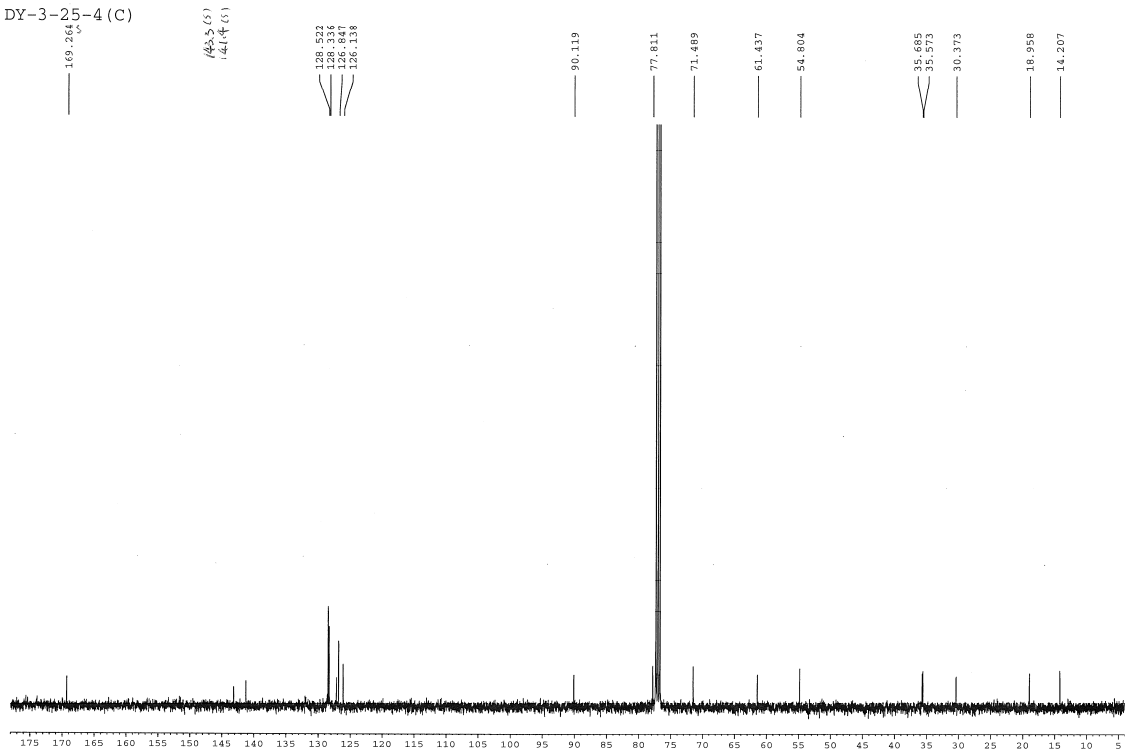



DY-3-25-1(H)  
 COSYGPSW COSYGPSW

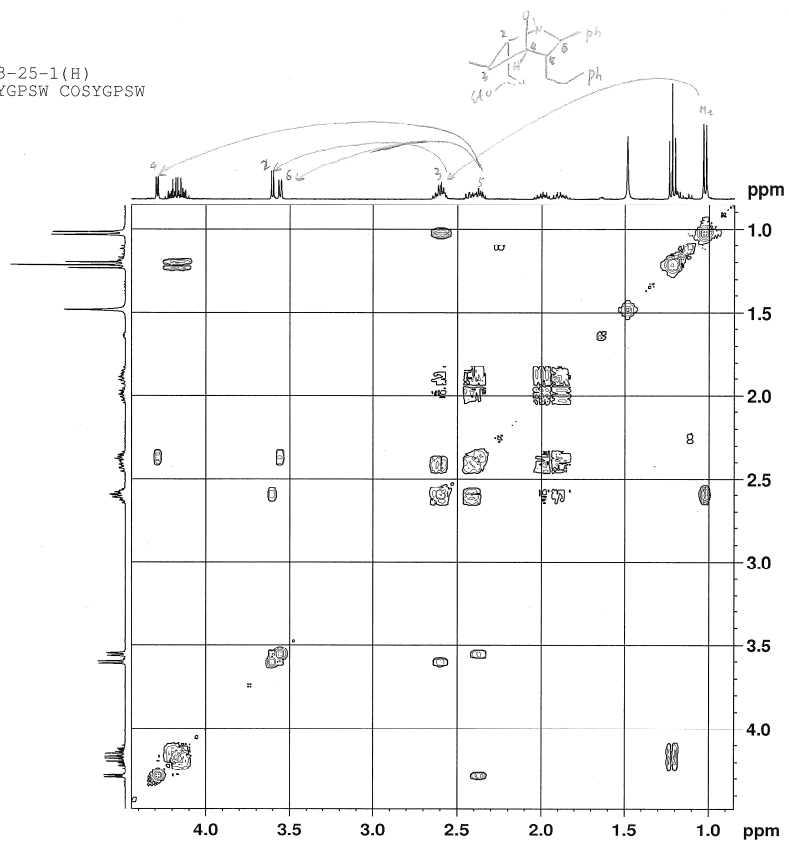

DY-3-25-3 (APT)

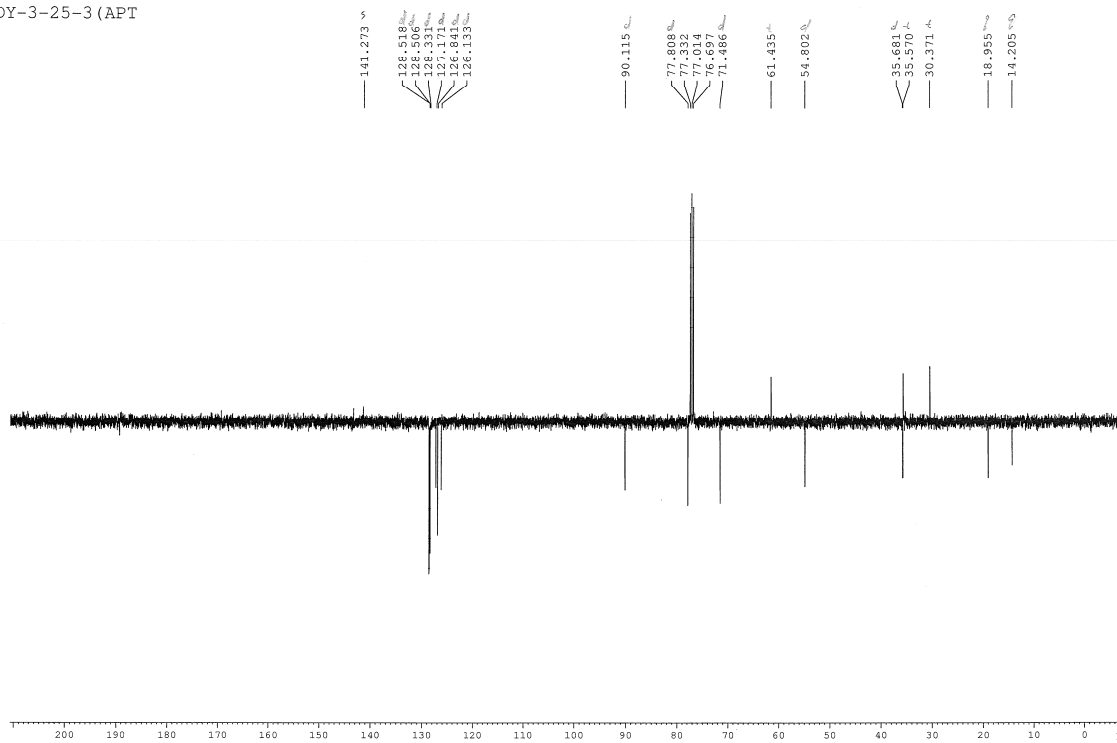

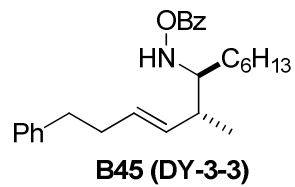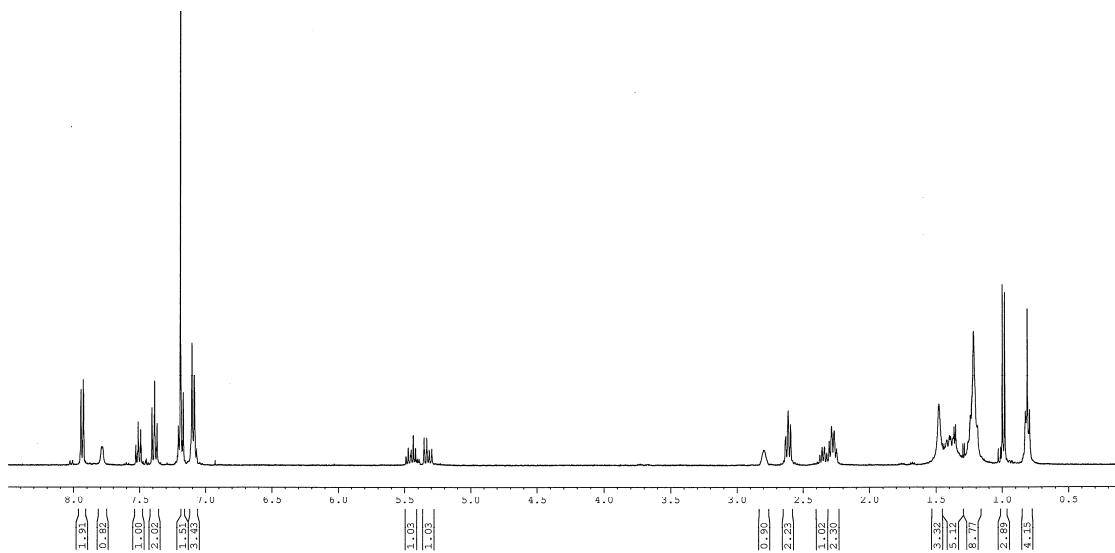

DY-2-191-4 (AP)

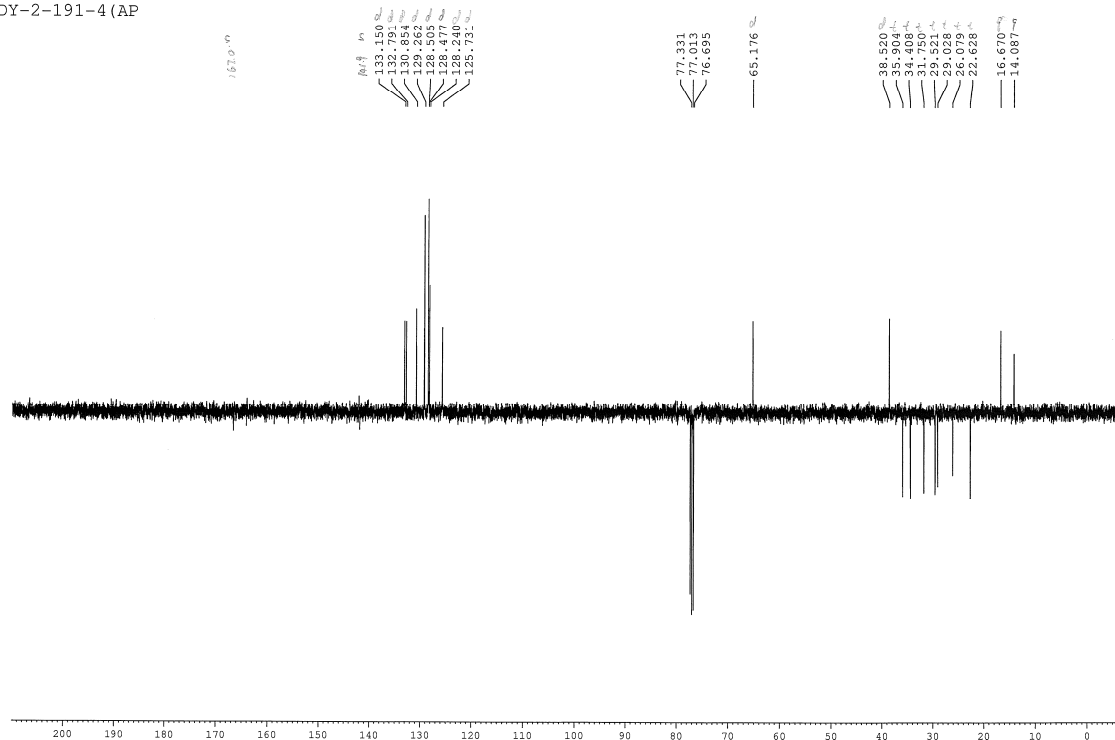

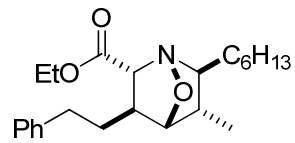

46 (DY-3-24)

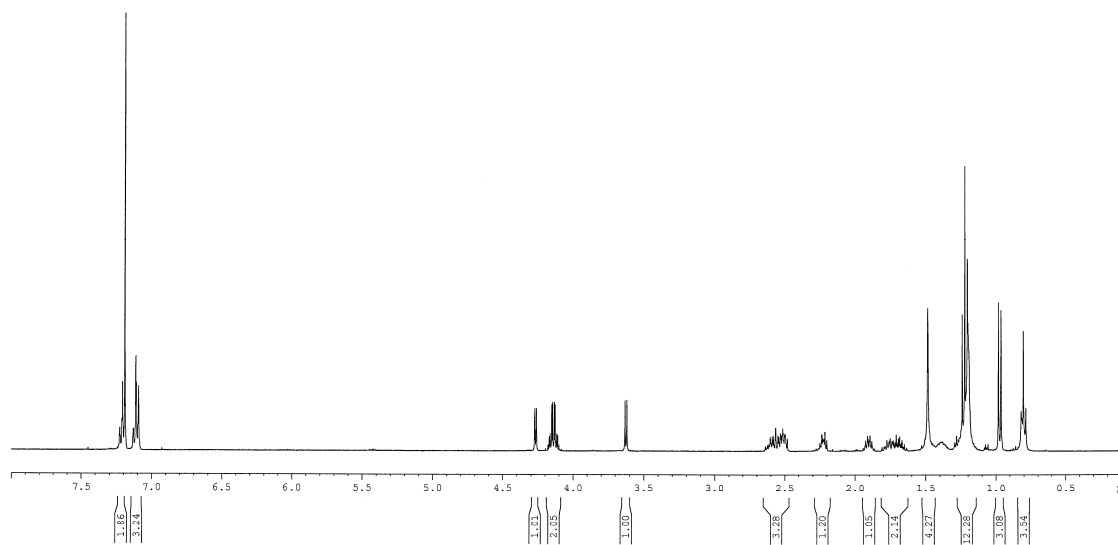

DY-3-24-10 (C)

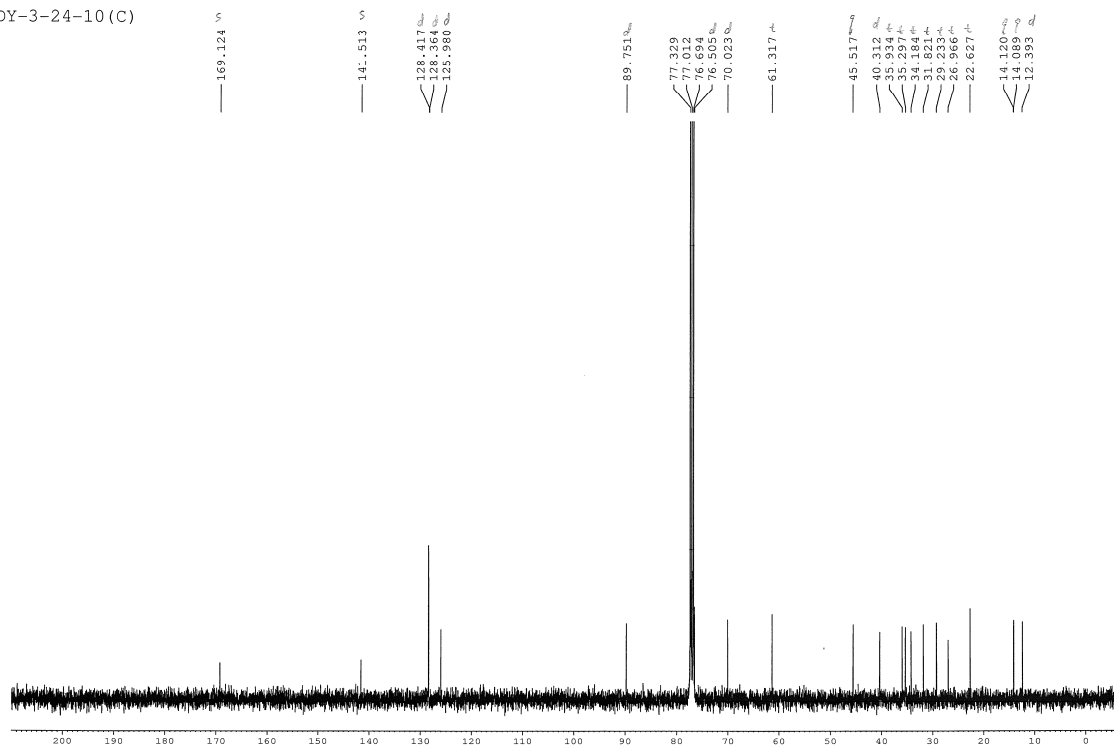

DY-3-24-2 (COSY)

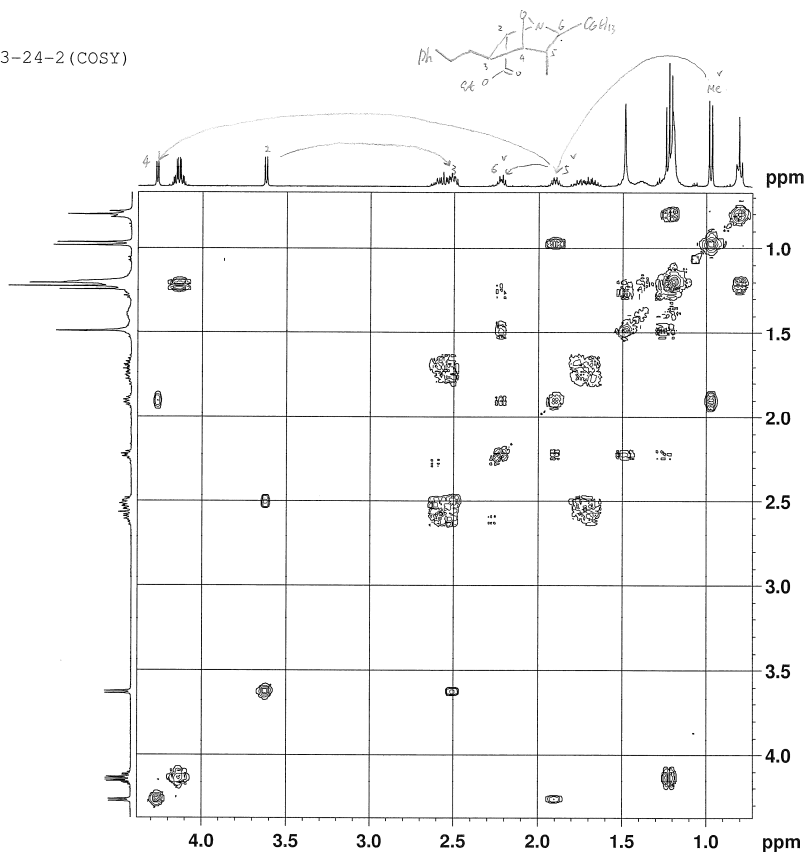

DY-3-24-3 (APT)

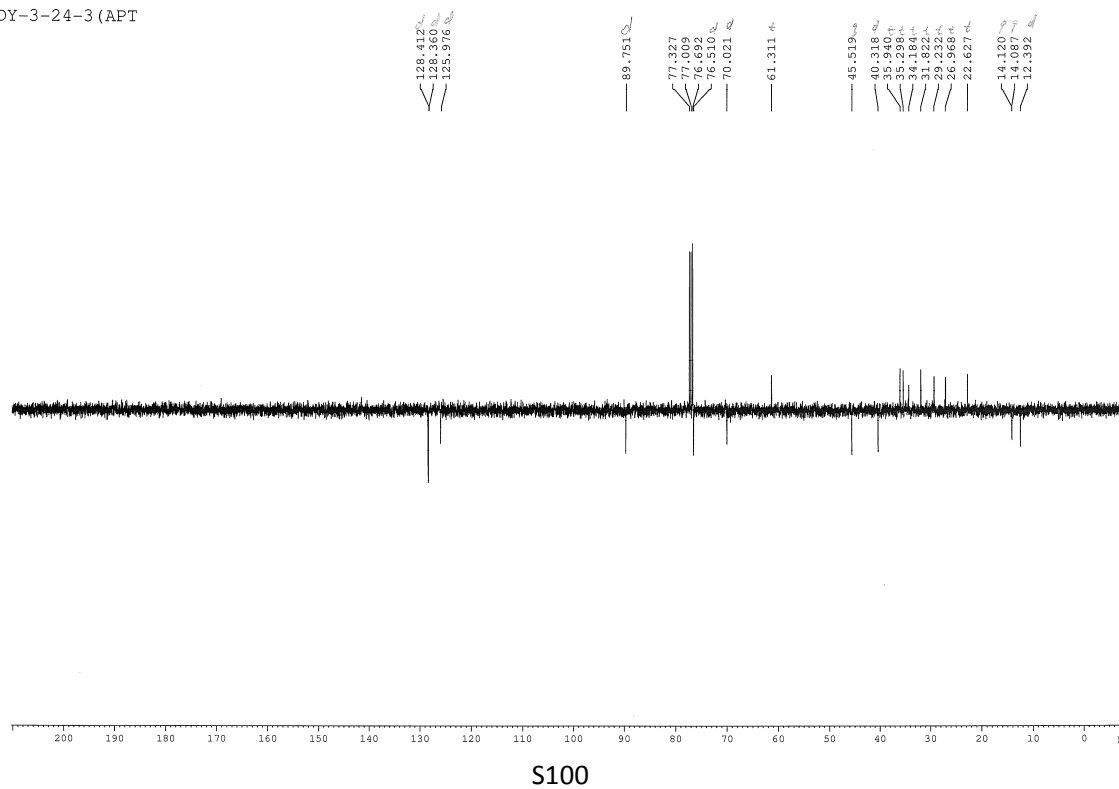

S100

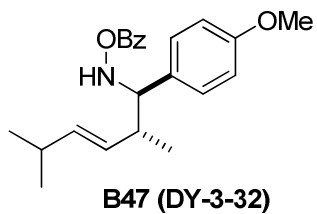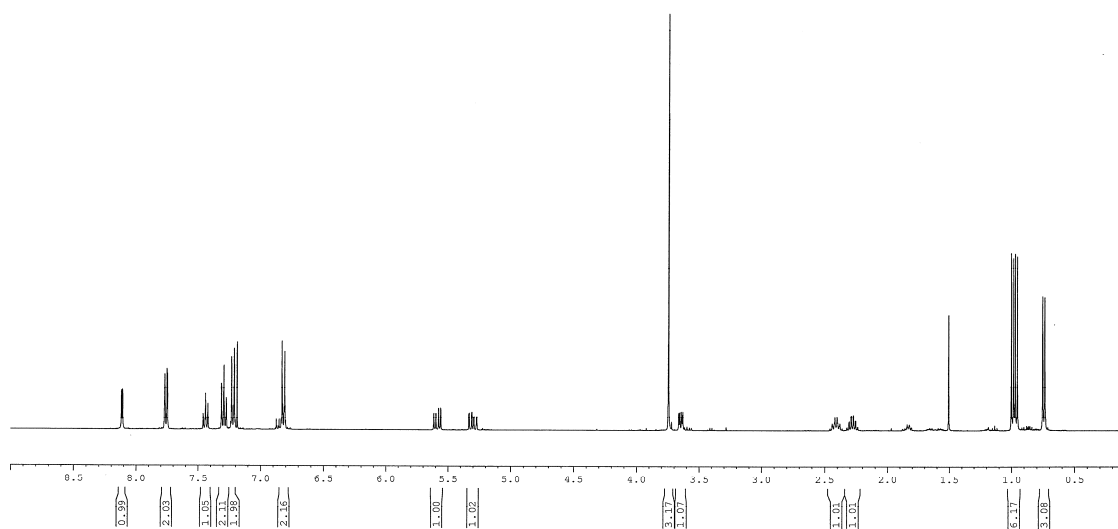

DY-3-32-3 (APT)

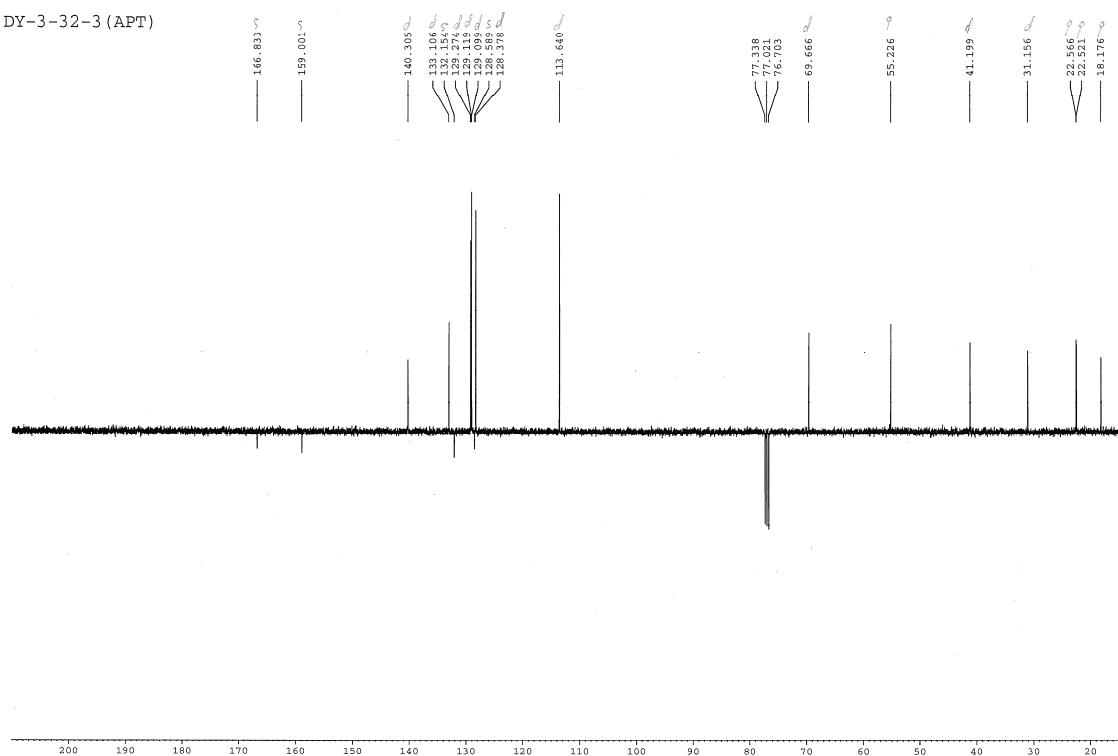

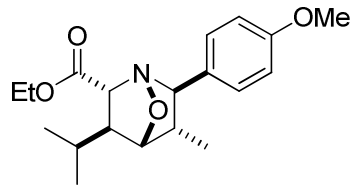

48 (DY-3-34)

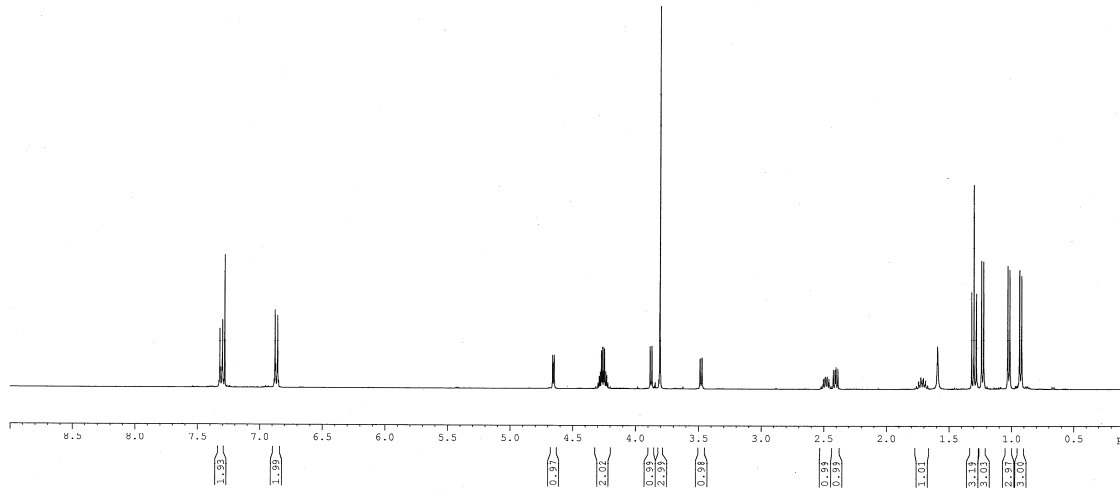

DY-3-34-4 (C)

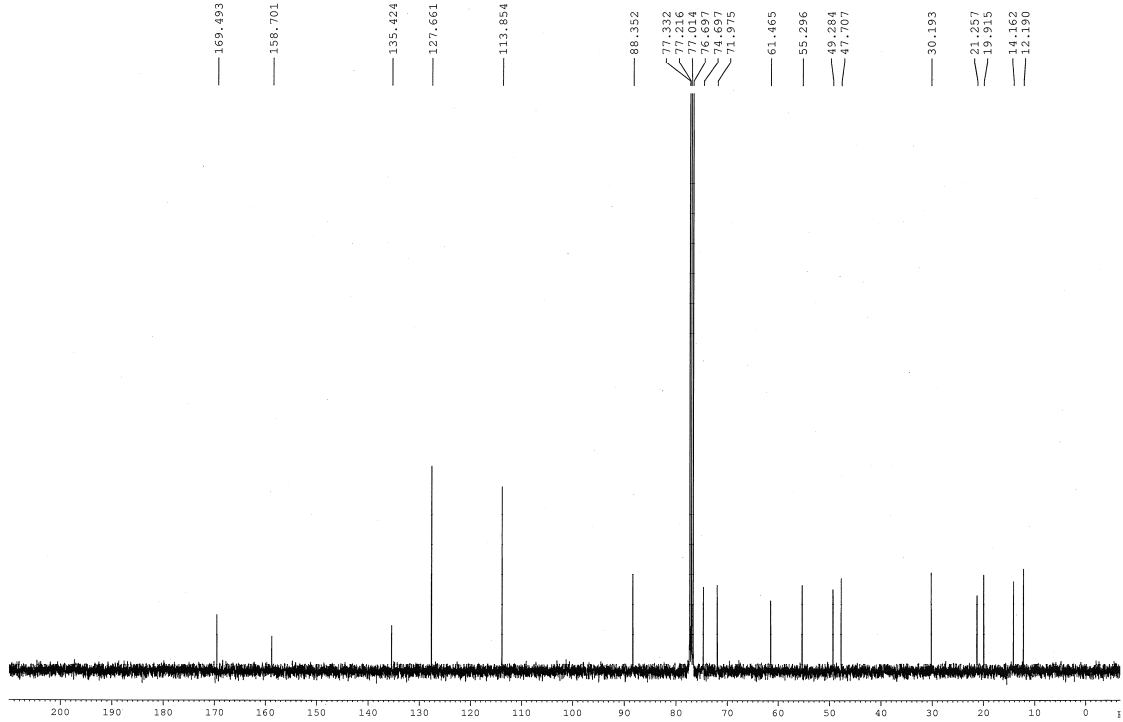

DY-3-34-2 (COSY)

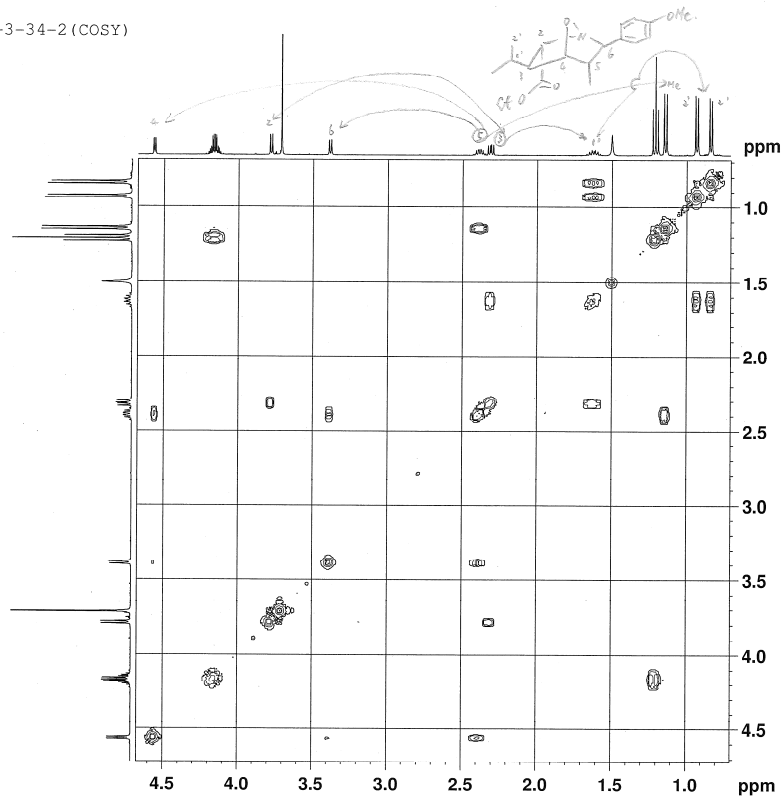

DY-3-34-3 (APT)

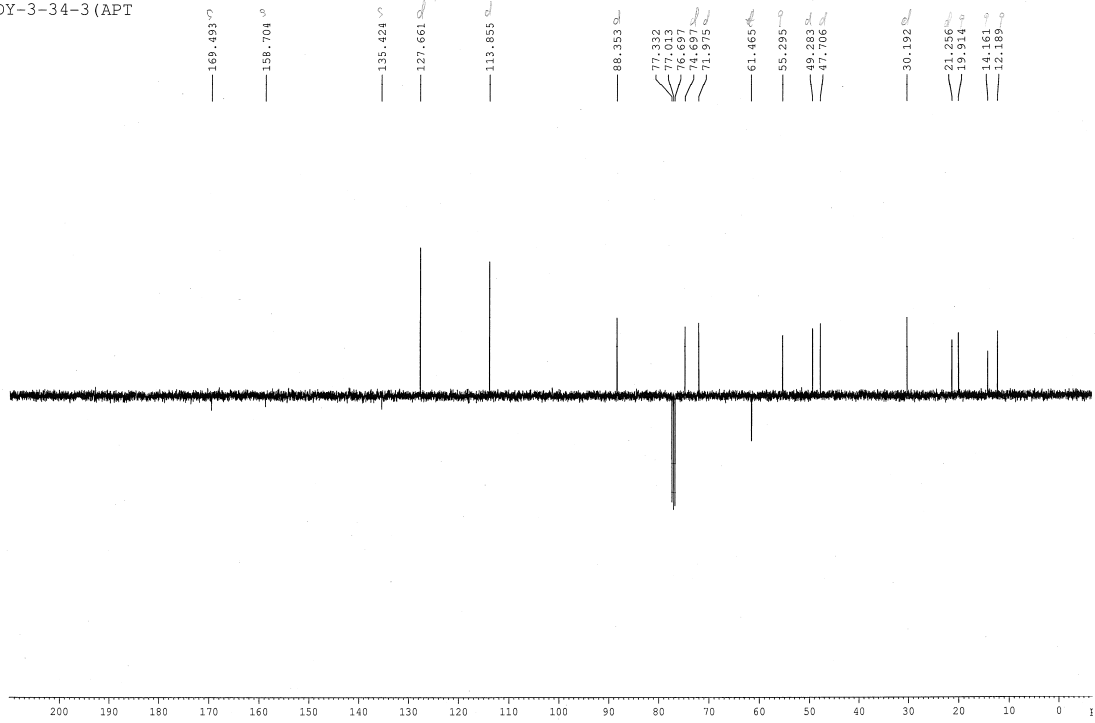

S103

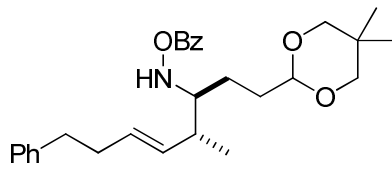

**B49 (DY-3-39)**

Note: 49 is contaminated by little inseparable

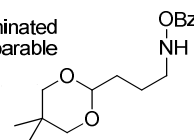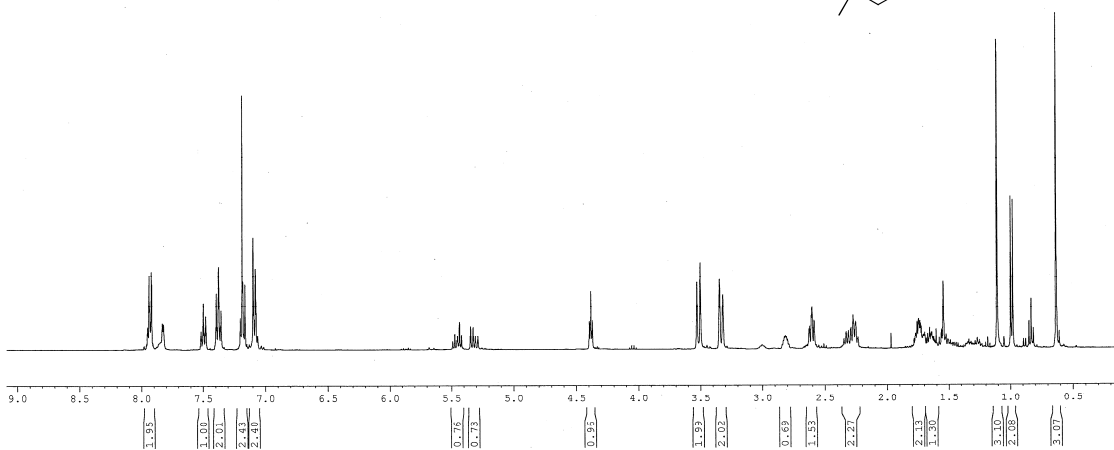

DY-3-39-4 (C)

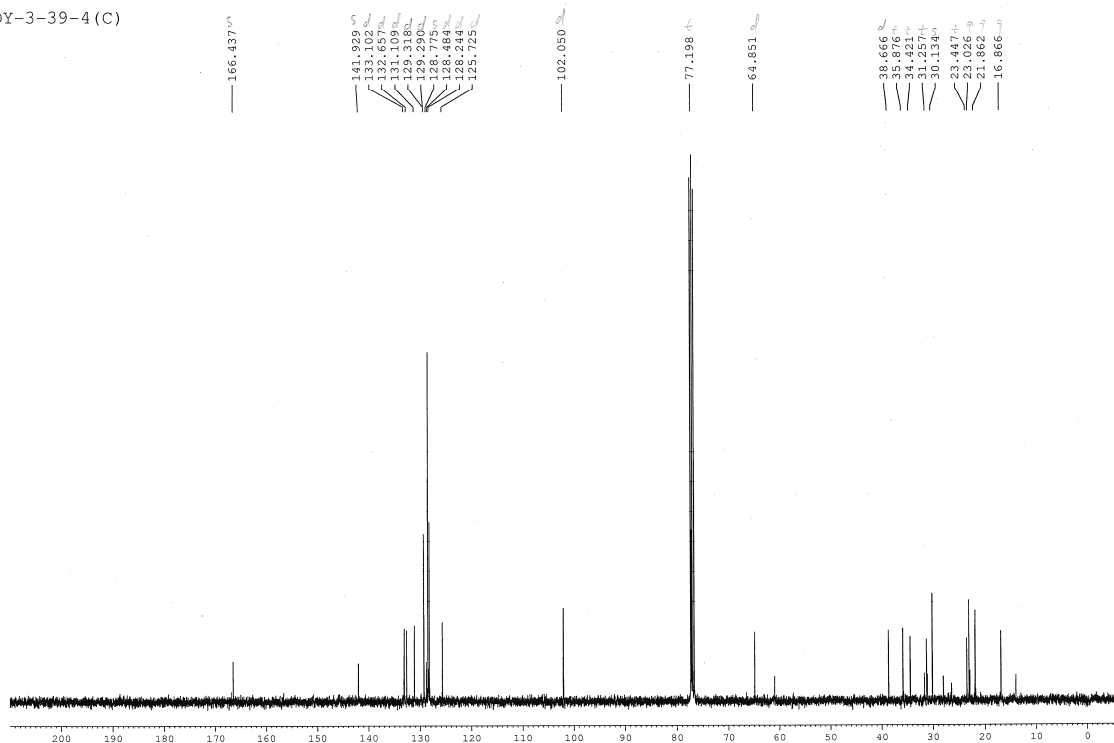



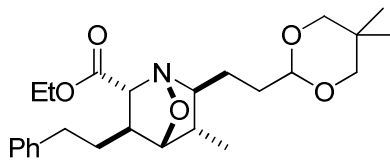

50 (DY-3-42)

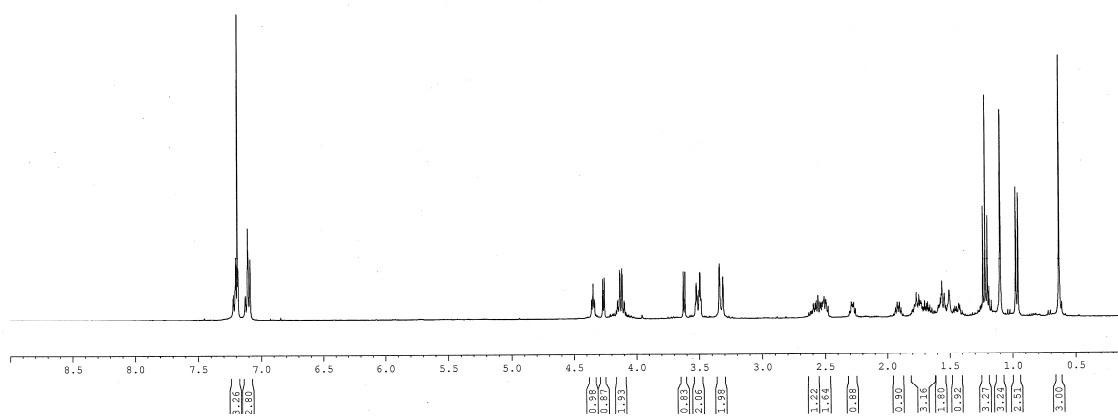

DY-3-42-3 (C)

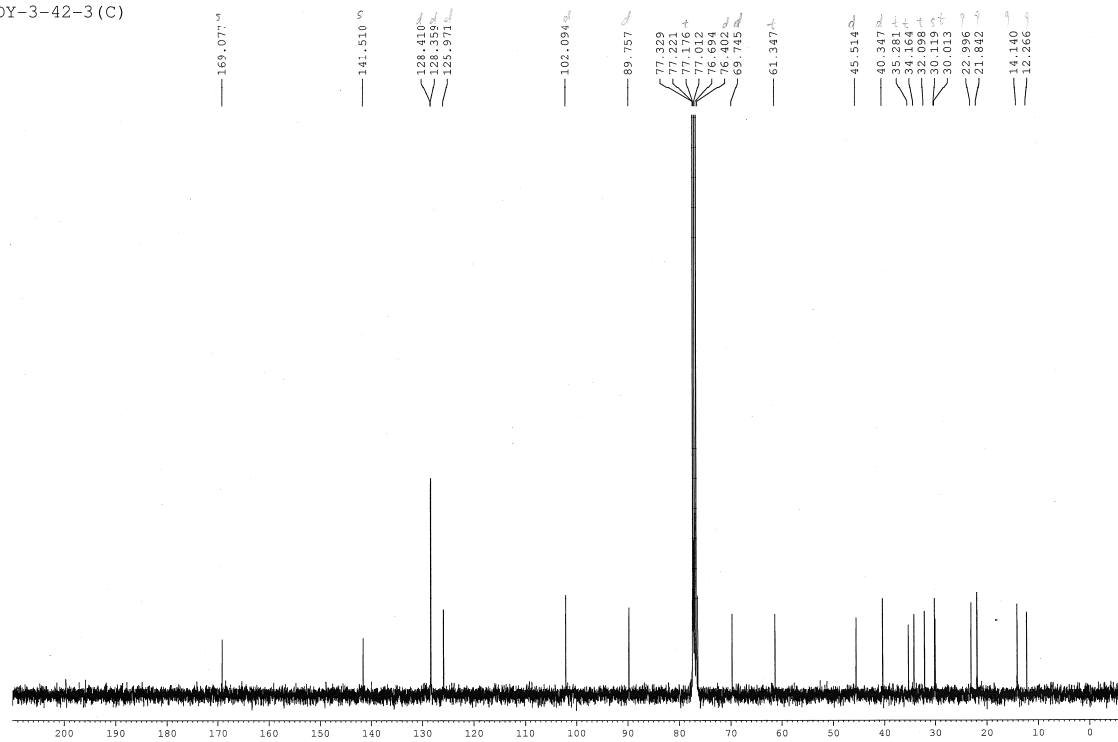

DY-3-42-1 (H)  
 COSYGPSW COSYGPSW

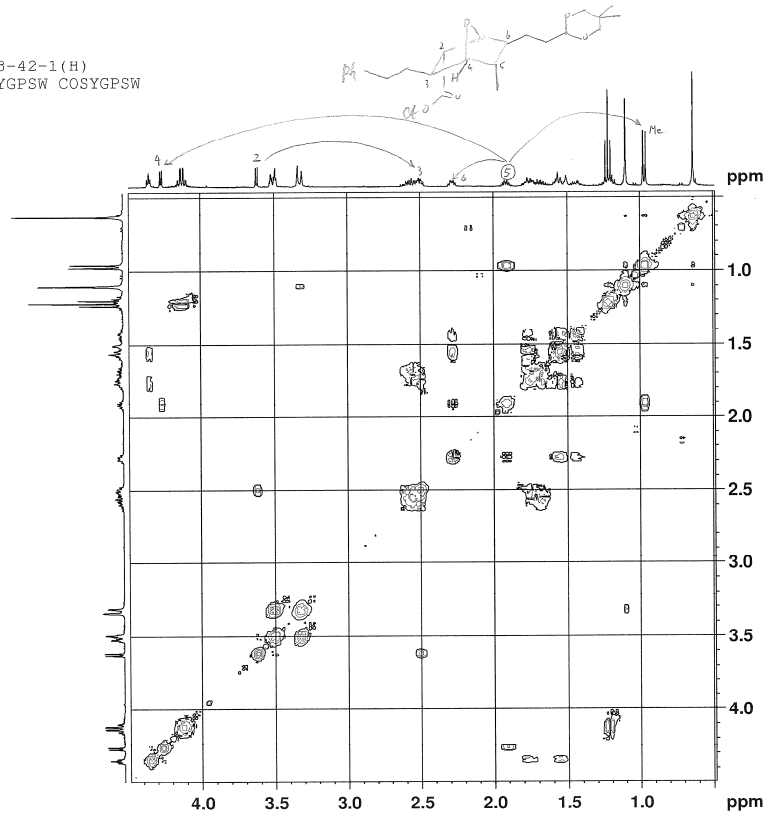

DY-3-42-2 (APT)

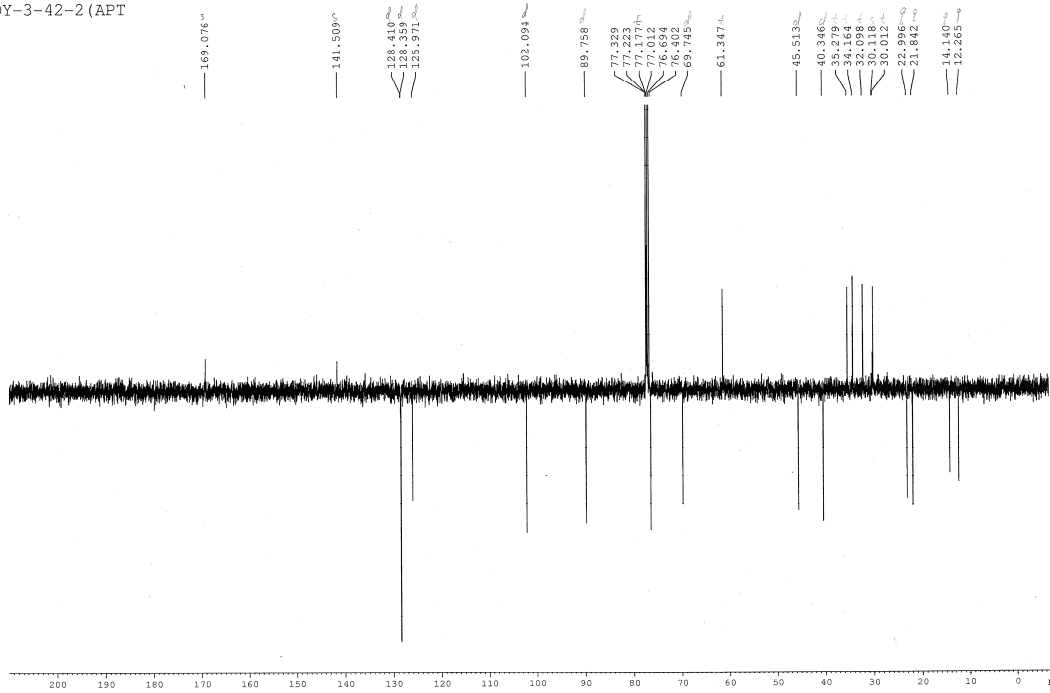

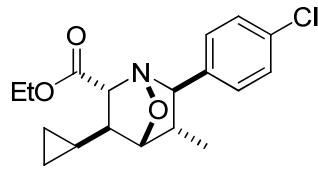

51 (DY-3-59)

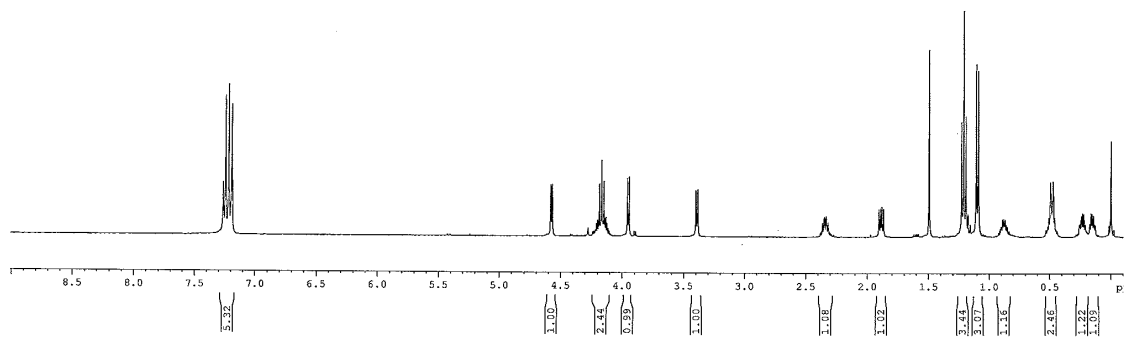

DY-3-59A-4 (C)

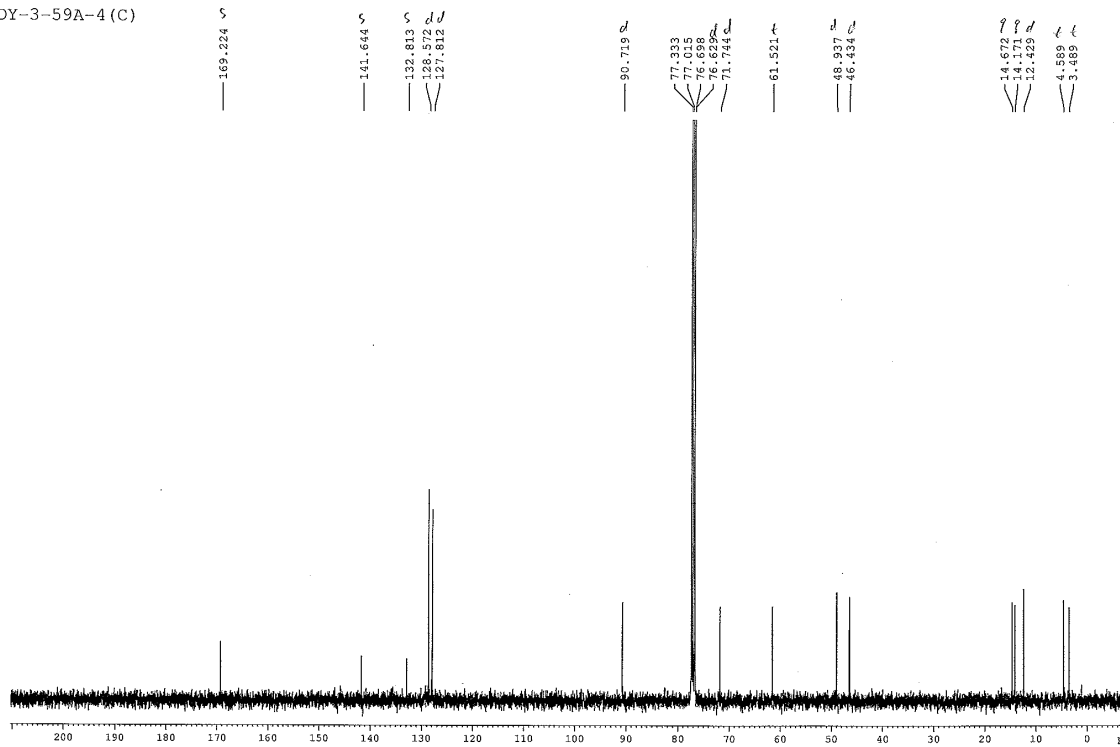

DY-3-59A-2 (COSY)

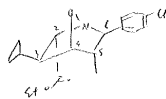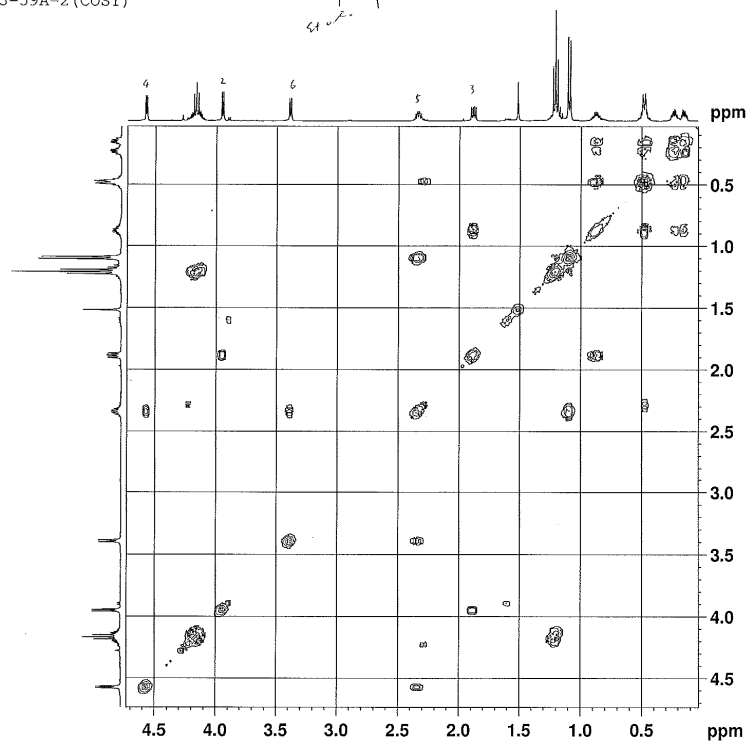

DY-3-59A-3 (AP)

- 169.221 s
- 141.648 s
- 132.810 s
- 129.129 s
- 128.570 s
- 128.039 s
- 127.812 s
- 90.718 d
- 77.340
- 77.022
- 76.705
- 76.627 s
- 71.741 d
- 61.520 t
- 48.936 d
- 46.433 d
- 14.672 s
- 14.170 s
- 12.428 d
- 4.588 s
- 3.485 d

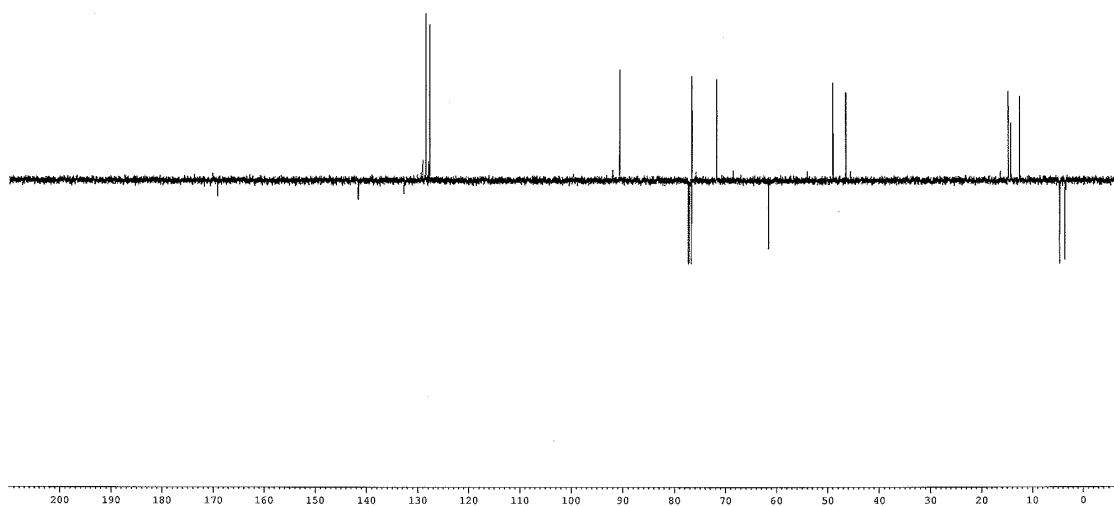

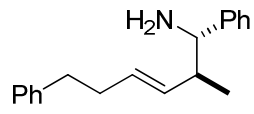

52 (DY-3-75)

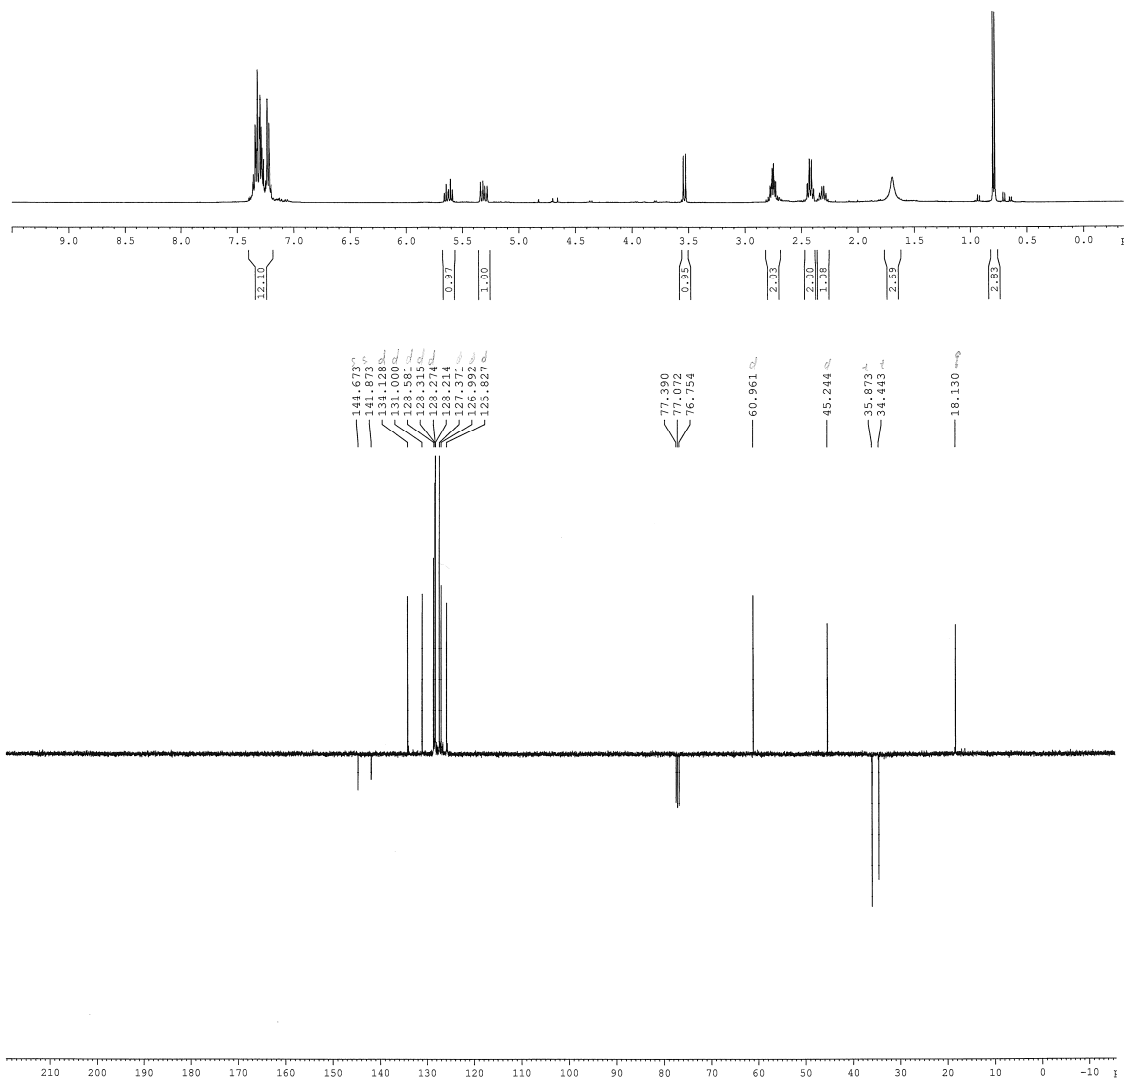

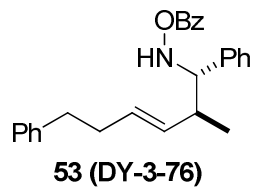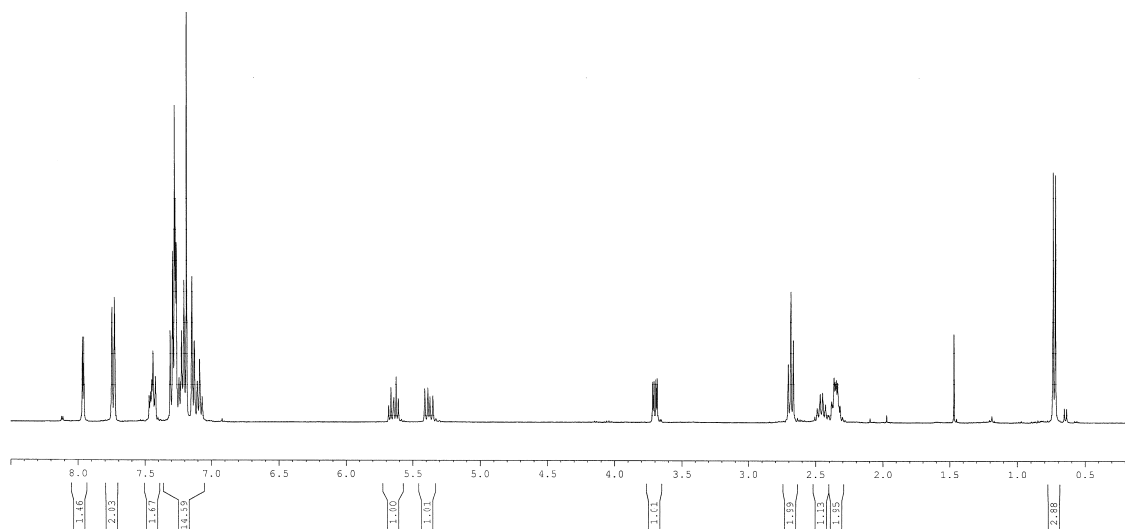

DY-3-76-3 (APT)

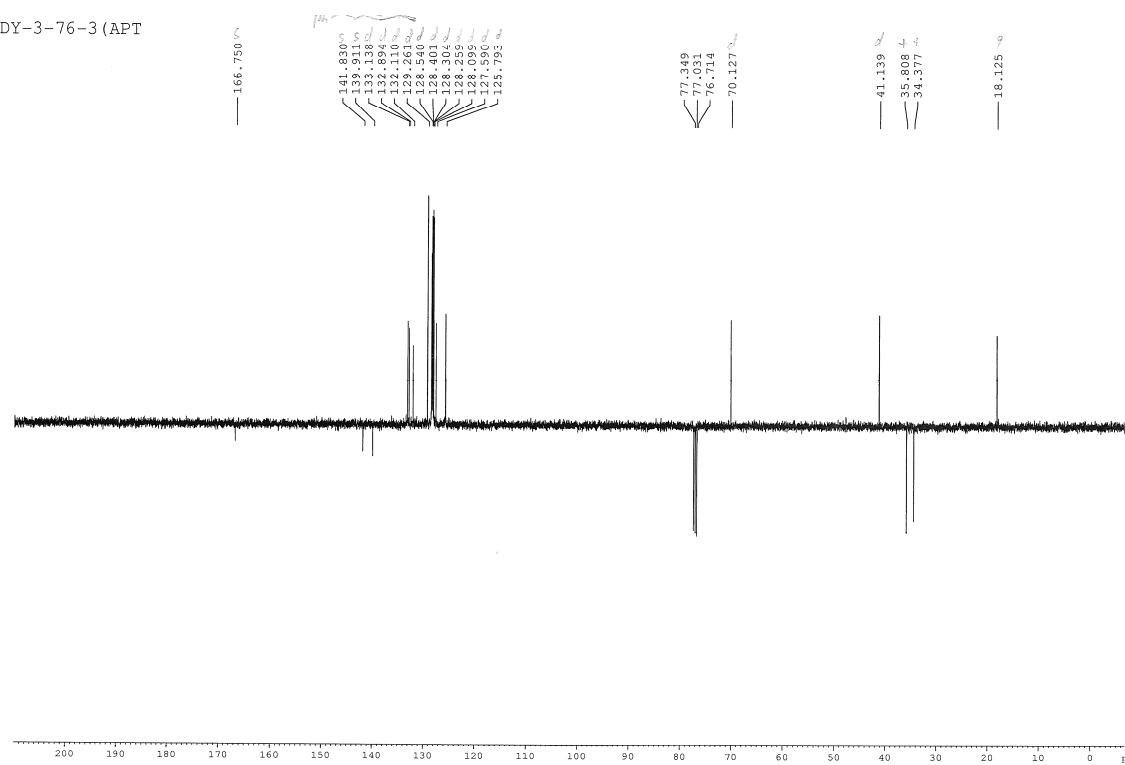

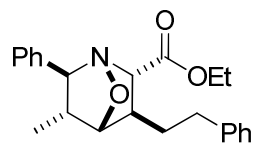

**54 (DY-3-78)**

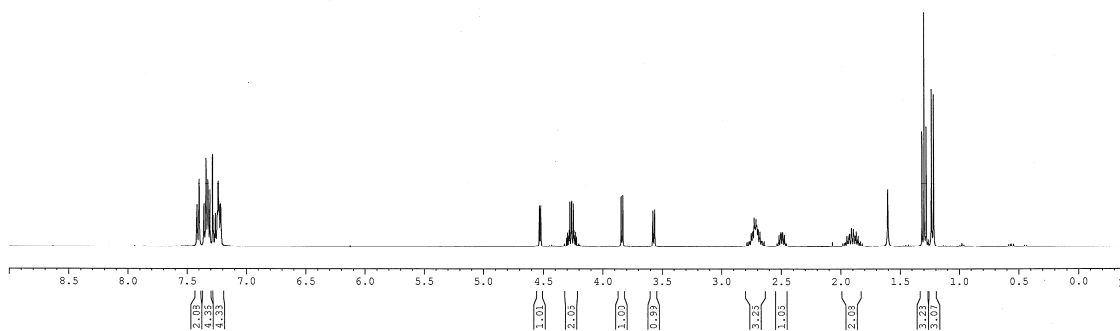

DY-3-78-4 (C)

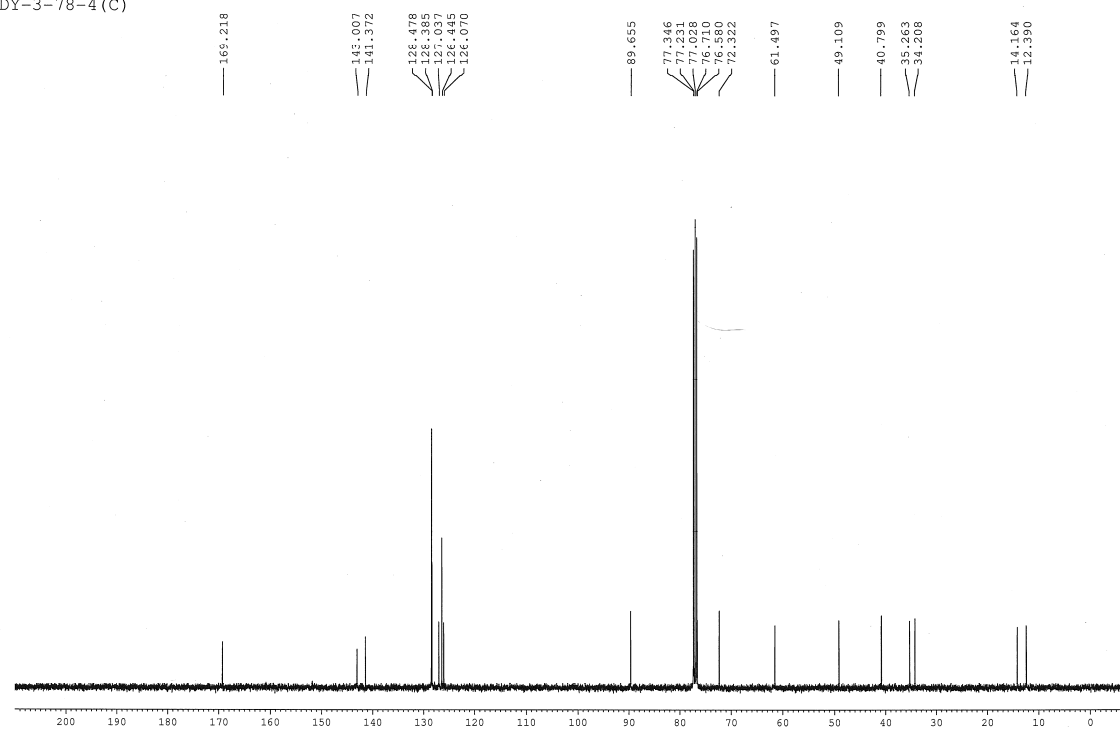

DY-3-78-2 (COSY)

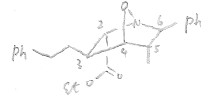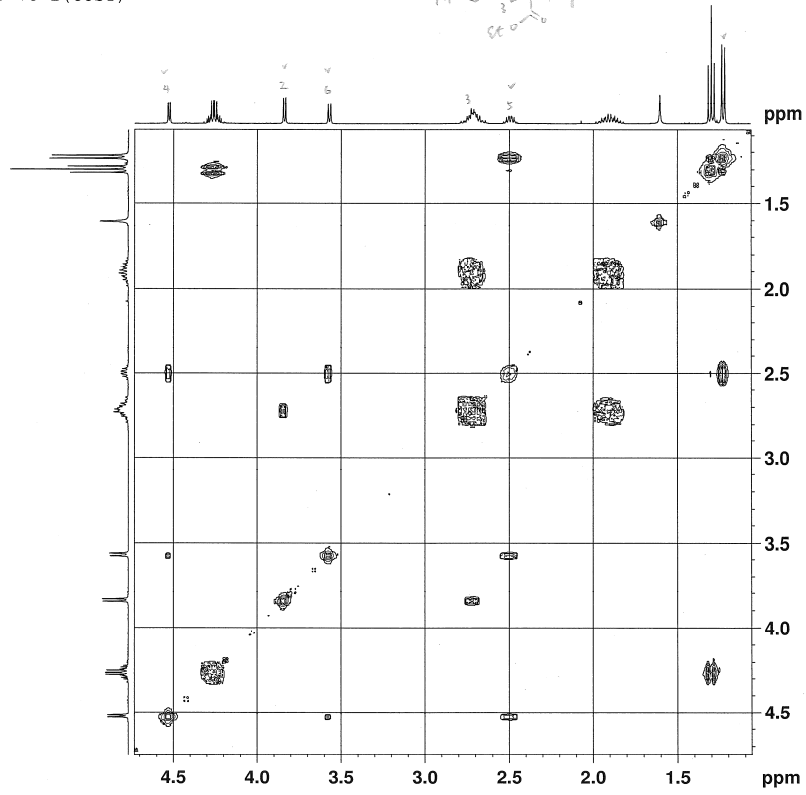

DY-3-78-2 (COS)

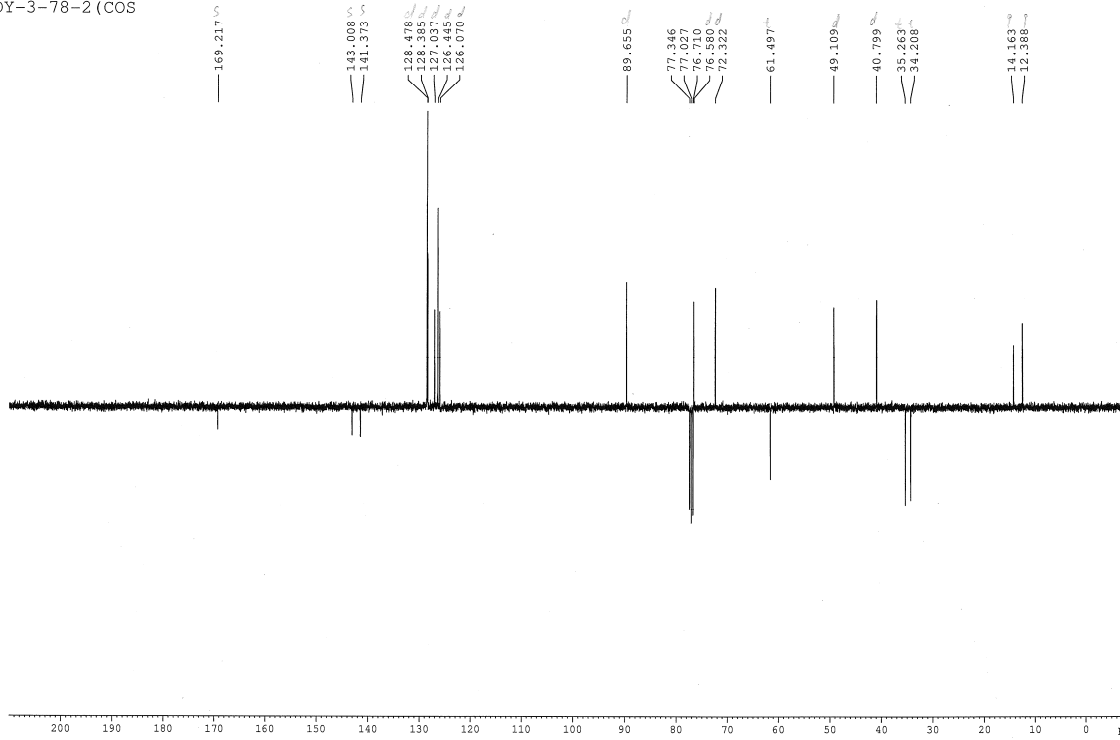



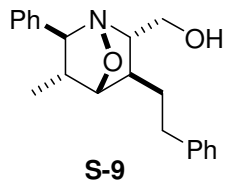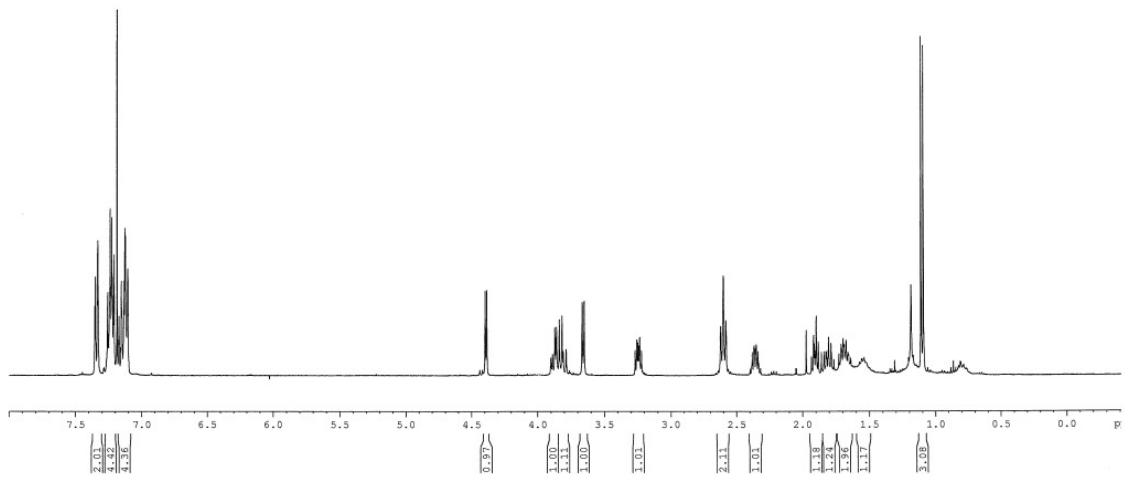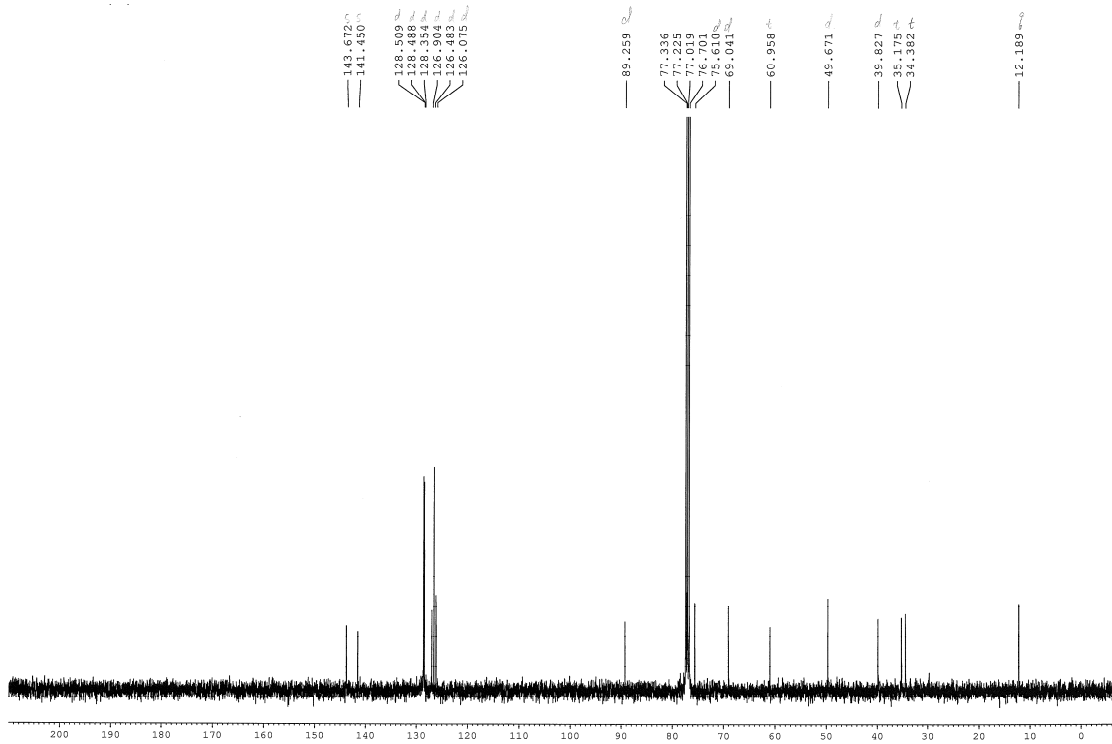

S113

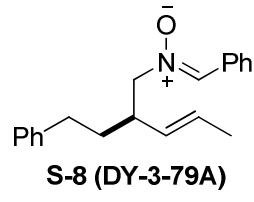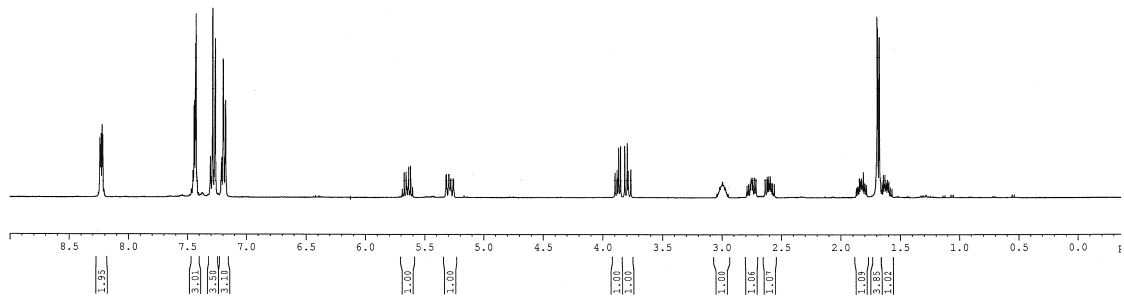

DY-3-78B-3 (AP)

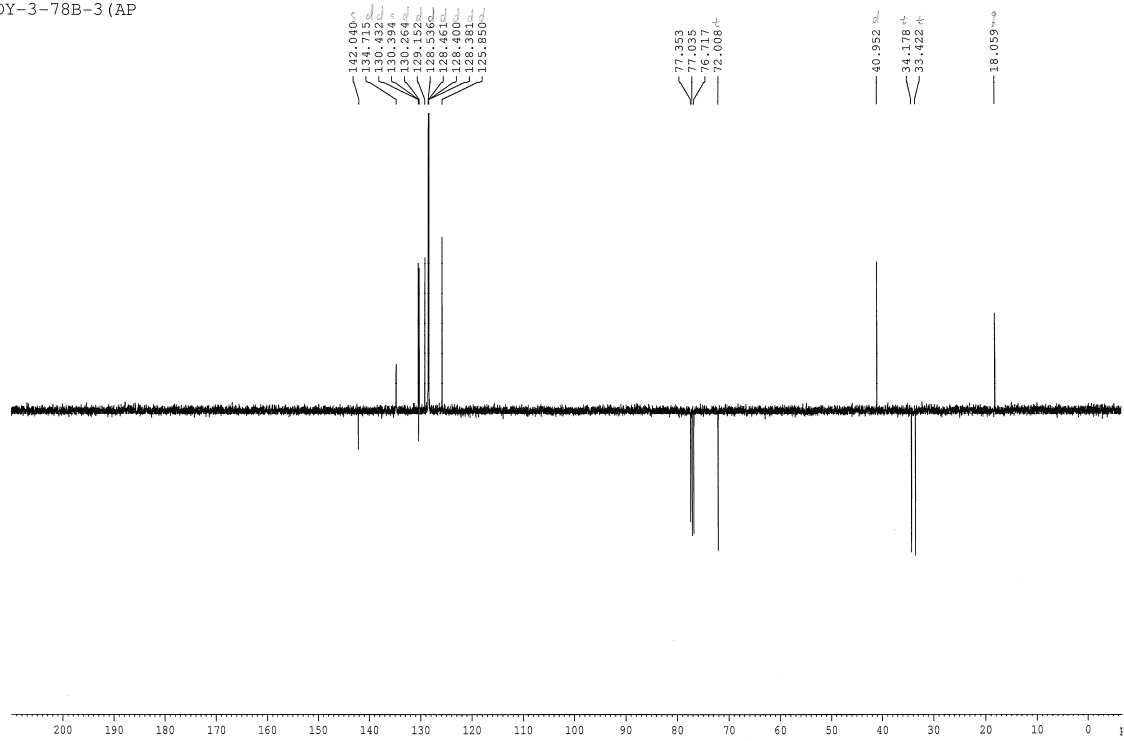

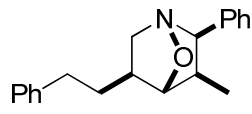

55 (DY-3-79B)

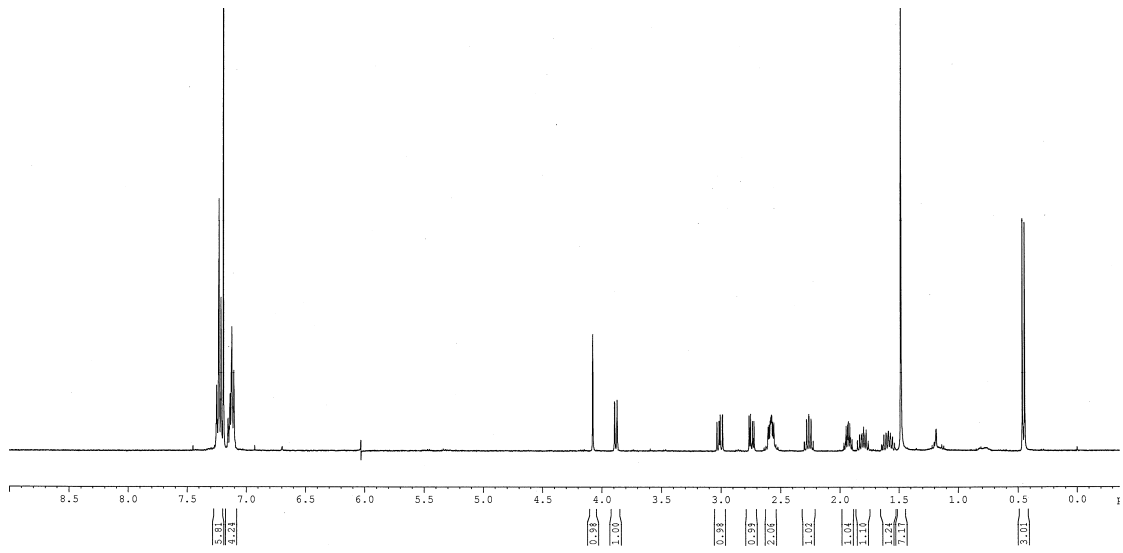

DY-3-79II-5 (C)

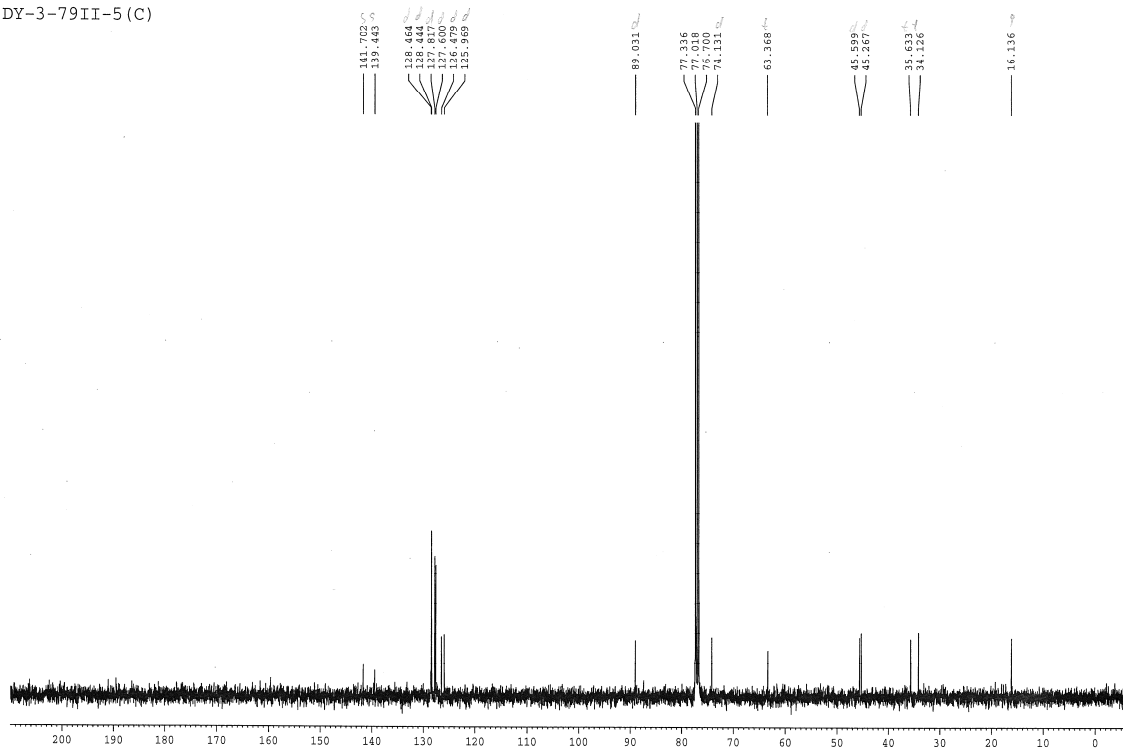

DY-2-79II-2 (COSY)



DY-3-79II-4 (A)



S116

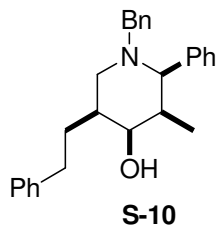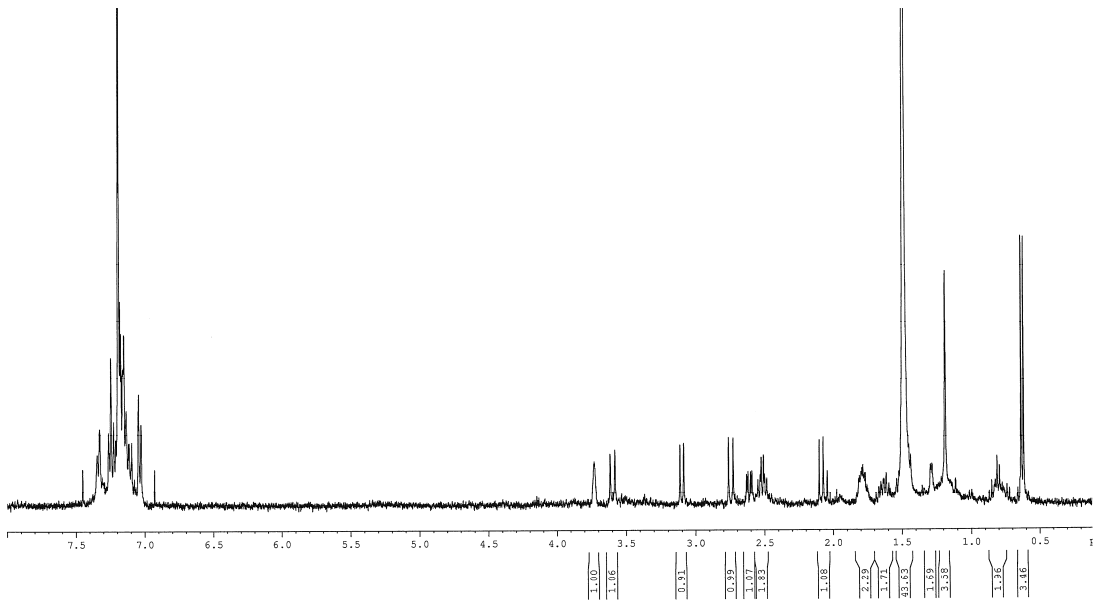

DY-3-135-2 (COSY)

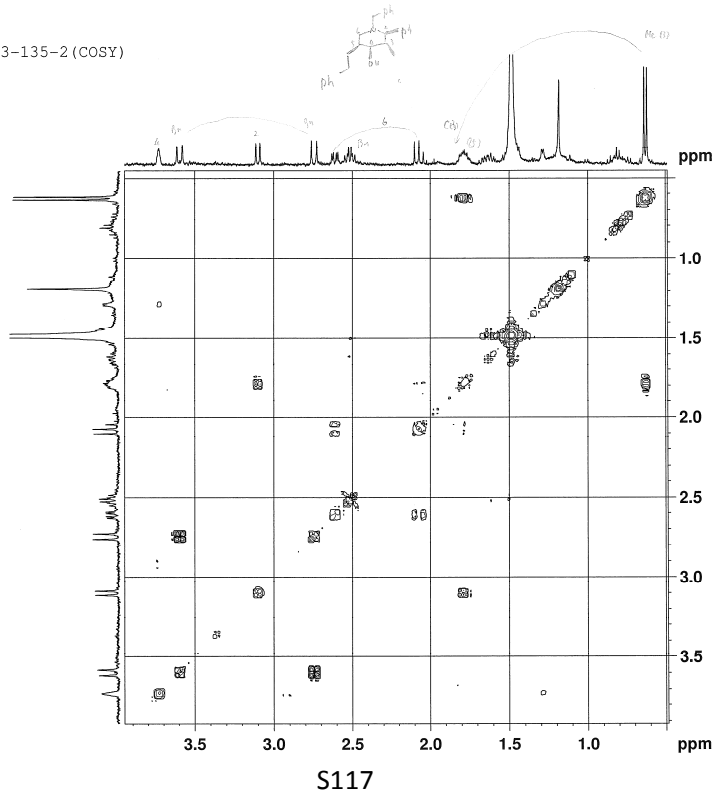

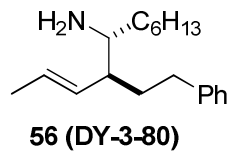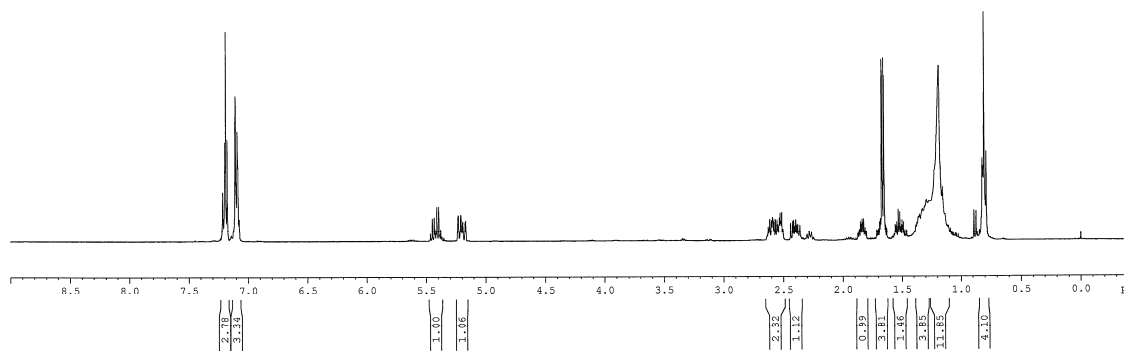

DY-3-80-4 (C)

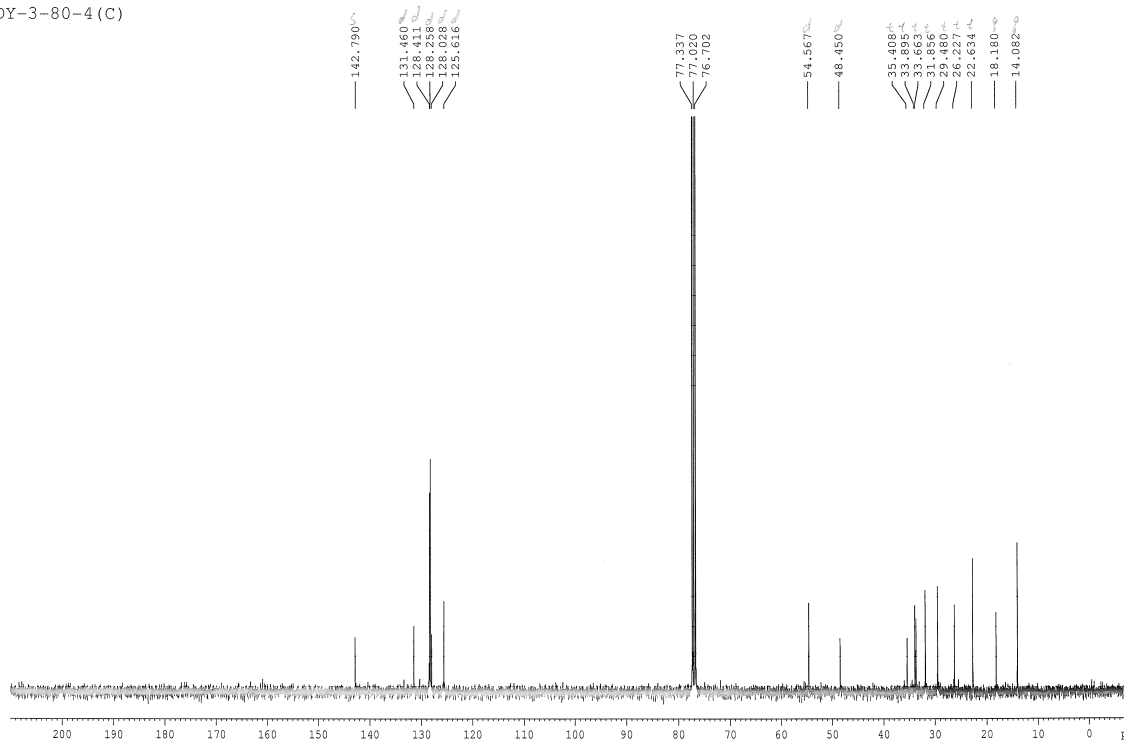

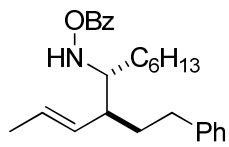

57 (DY-3-81)

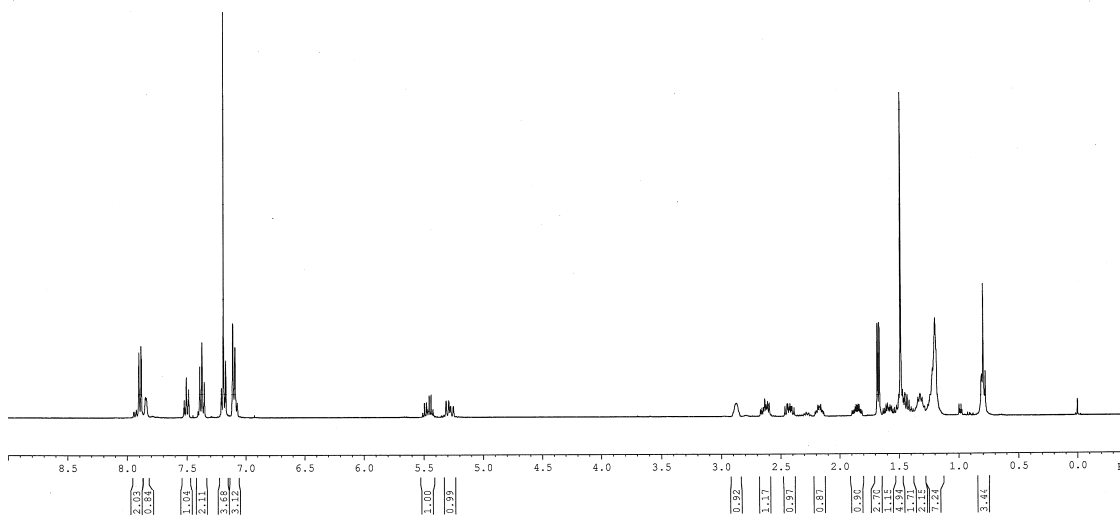

DY-3-81-4 (C)

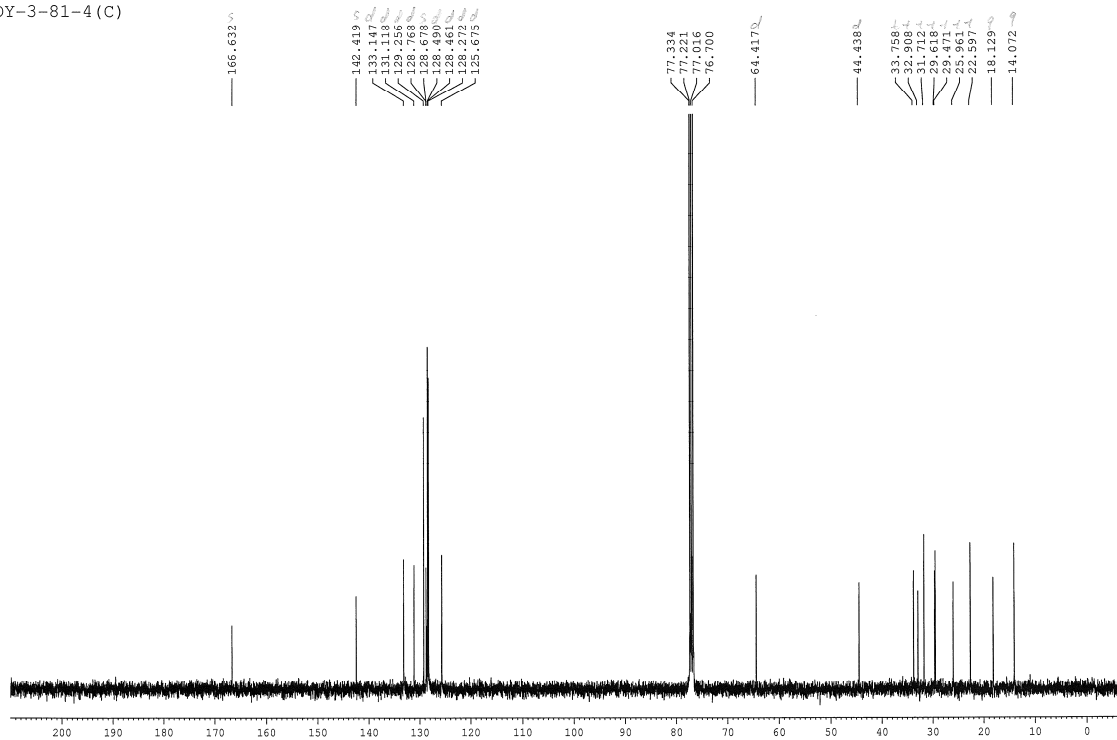

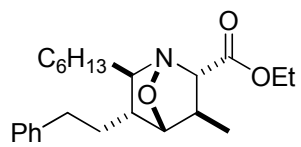

58 (DY-3-82)

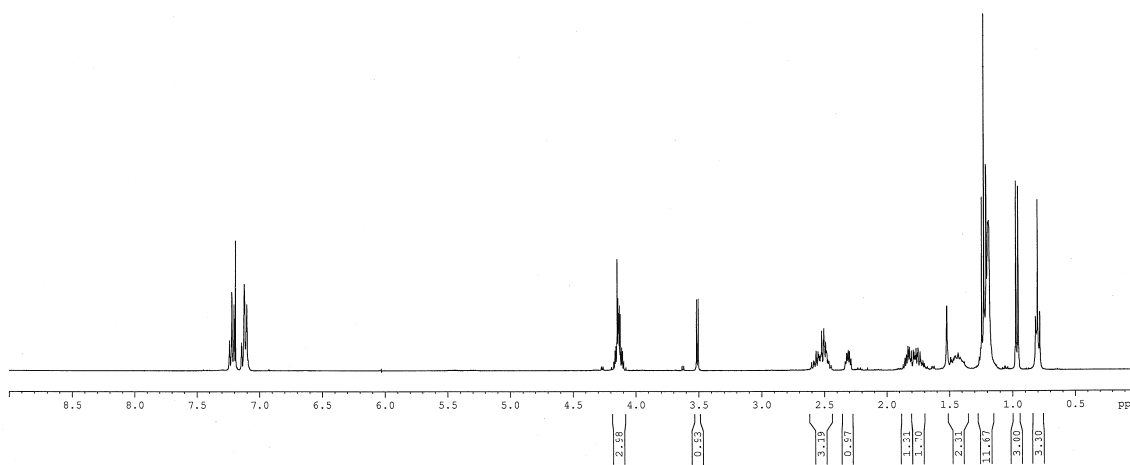

DY-3-82-4 (C)

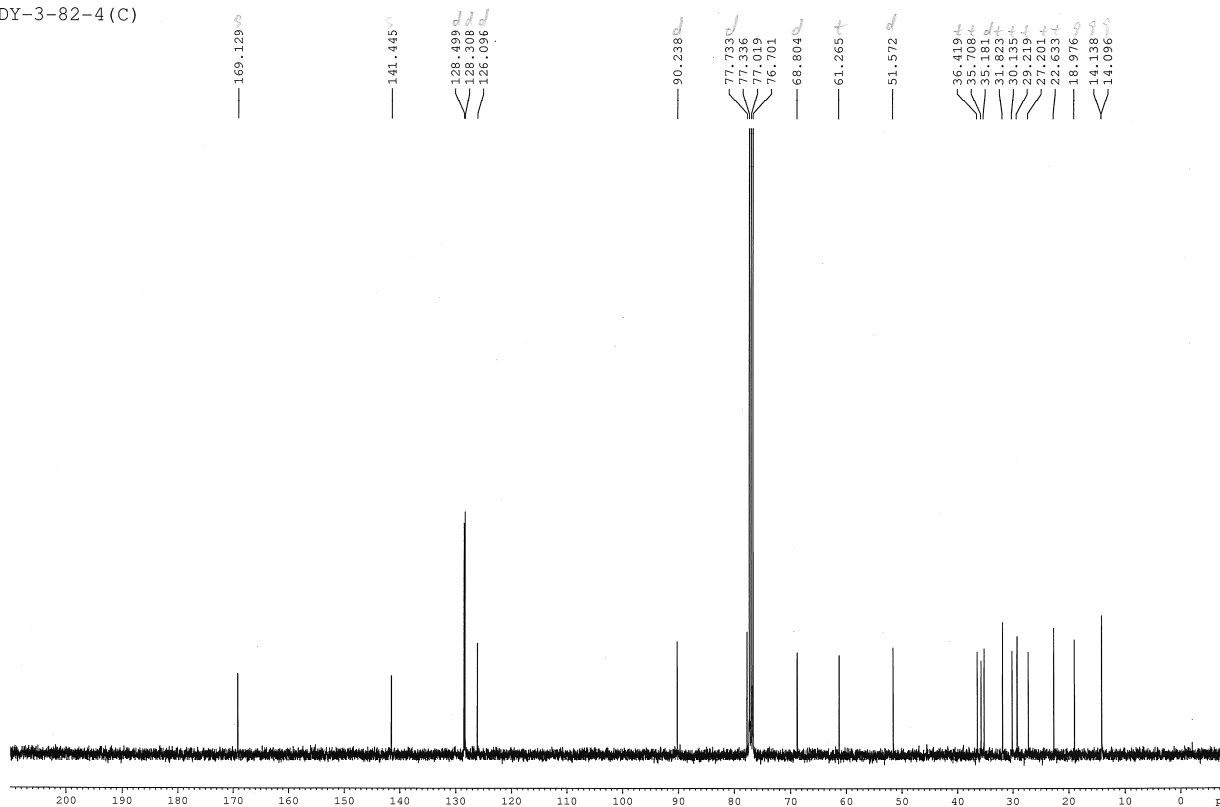



DY-3-82-2 (COSY)

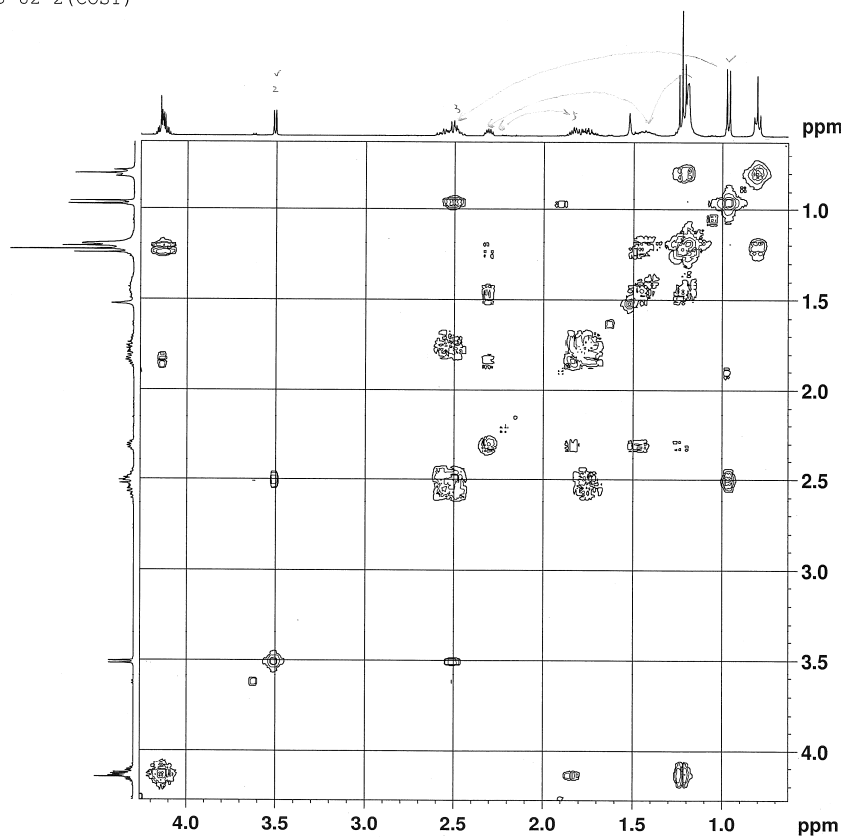

DY-3-82-3 (APT)

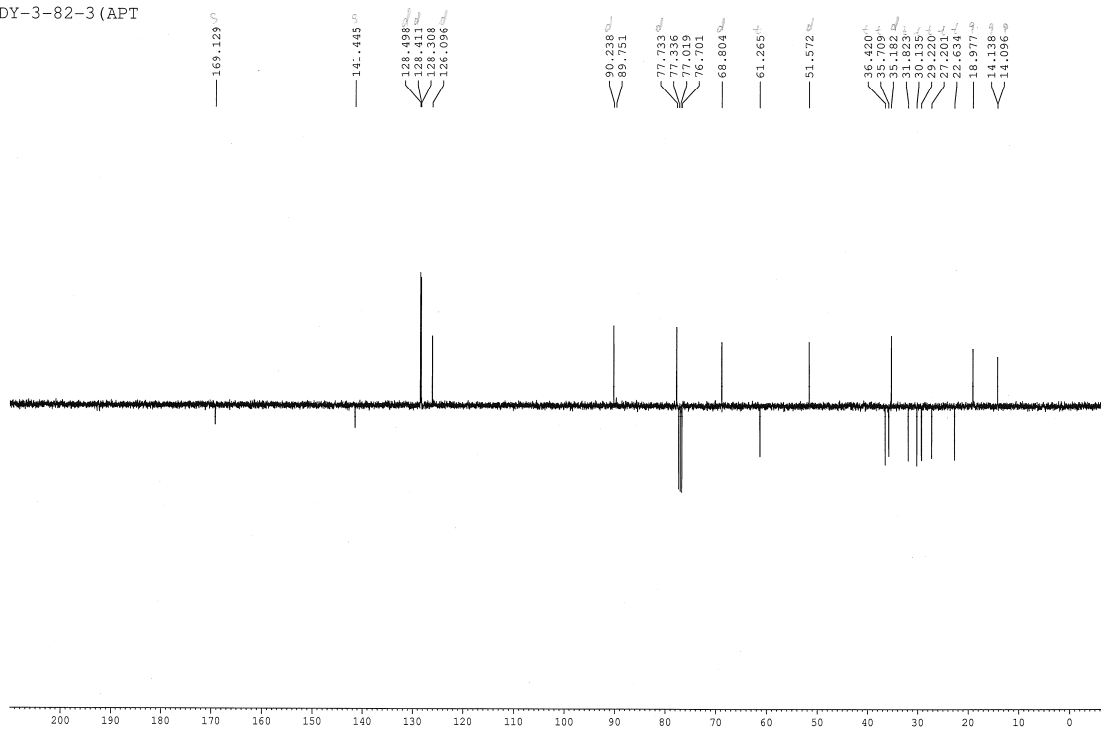

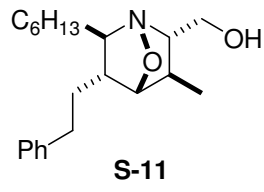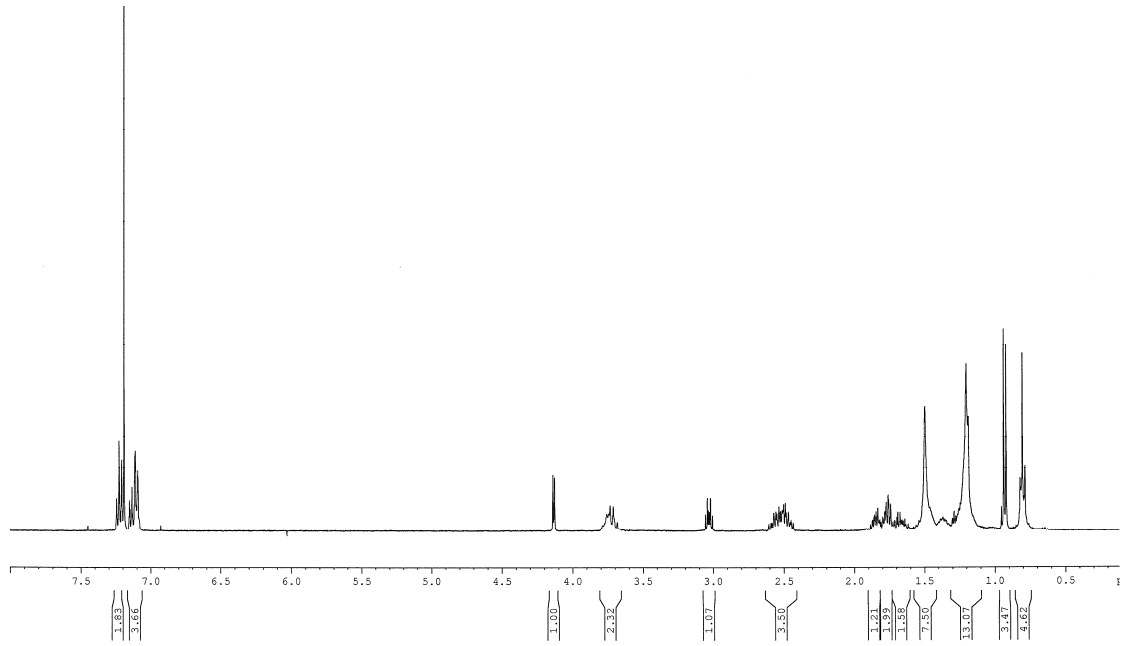

DY-3-115-2 (CO)

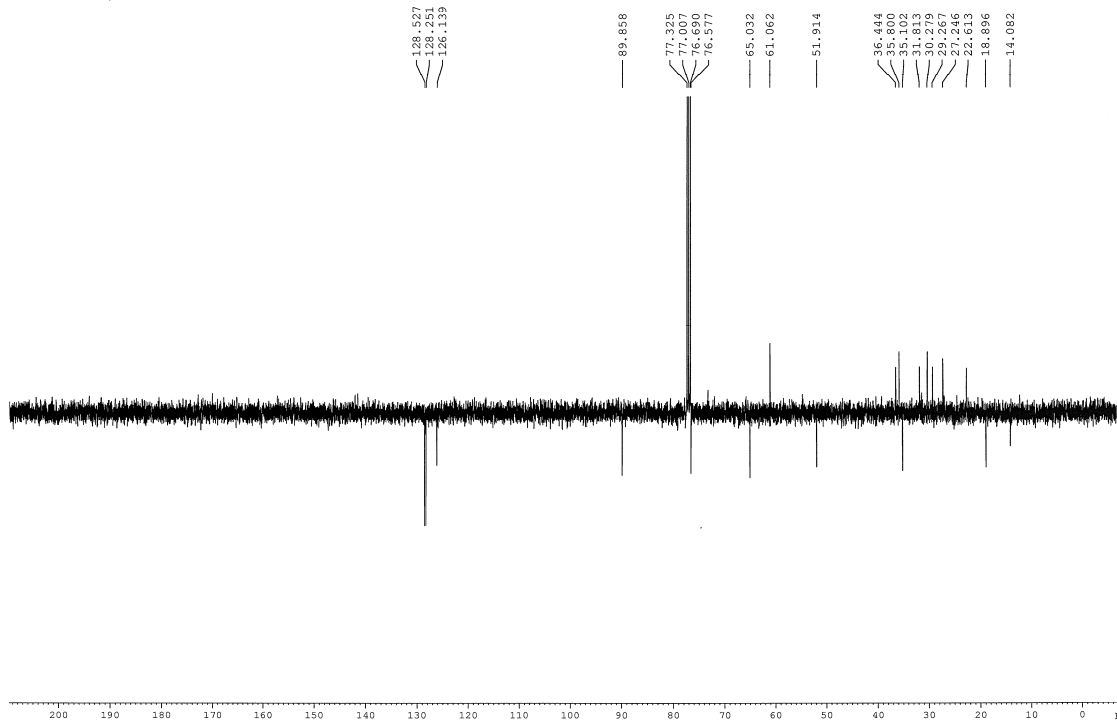

S122
